# Supplementary material for: Cardiovascular risk factor documentation and management in primary care electronic medical records among people with schizophrenia in Ontario, Canada: retrospective cohort study
Source: PubMed Central journal article supplement — BMJ Open. 2020 Oct 16;10(10):e038013. doi: 10.1136/bmjopen-2020-038013 (PMC7569984; doi:10.1136/bmjopen-2020-038013), 2020-10-16
Supplement: bmjopen-2020-038013.draft_revisions.pdf [file bmjopen-2020-038013.draft_revisions.pdf]

# BMJ Open

BMJ Open is committed to open peer review. As part of this commitment we make the peer review history of every article we publish publicly available.

When an article is published we post the peer reviewers' comments and the authors' responses online. We also post the versions of the paper that were used during peer review. These are the versions that the peer review comments apply to.

The versions of the paper that follow are the versions that were submitted during the peer review process. They are not the versions of record or the final published versions. They should not be cited or distributed as the published version of this manuscript.

BMJ Open is an open access journal and the full, final, typeset and author-corrected version of record of the manuscript is available on our site with no access controls, subscription charges or pay-per-view fees (<http://bmjopen.bmj.com>).

If you have any questions on BMJ Open's open peer review process please email [info.bmjopen@bmj.com](mailto:info.bmjopen@bmj.com)

# BMJ Open

## Cardiovascular disease risk in patients with schizophrenia: retrospective cohort study of risk factor documentation and management in primary care electronic medical records

|                               |                                                                                                                                                                                                                                                                                                                                                                                                                                                                                                                                                                                                                                                    |
|-------------------------------|----------------------------------------------------------------------------------------------------------------------------------------------------------------------------------------------------------------------------------------------------------------------------------------------------------------------------------------------------------------------------------------------------------------------------------------------------------------------------------------------------------------------------------------------------------------------------------------------------------------------------------------------------|
| Journal:                      | <i>BMJ Open</i>                                                                                                                                                                                                                                                                                                                                                                                                                                                                                                                                                                                                                                    |
| Manuscript ID                 | bmjopen-2020-038013                                                                                                                                                                                                                                                                                                                                                                                                                                                                                                                                                                                                                                |
| Article Type:                 | Original research                                                                                                                                                                                                                                                                                                                                                                                                                                                                                                                                                                                                                                  |
| Date Submitted by the Author: | 25-Feb-2020                                                                                                                                                                                                                                                                                                                                                                                                                                                                                                                                                                                                                                        |
| Complete List of Authors:     | O'Neill, Braden; North York General Hospital, Family and Community Medicine; University of Toronto, Family and Community Medicine<br>Kalia, Sumeet; University of Toronto, Department of Family and Community Medicine<br>Aliarzadeh, Babak; University of Toronto, Department of Family and Community Medicine<br>Sullivan, Frank; University of St. Andrews, ; North York General hospital,<br><br>Moineddin, Rahim; University of Toronto, Family and Community Medicine<br>Kelly, Martina; University of Calgary Faculty of Medicine, DEPARTMENT OF FAMILY MEDICINE<br>Greiver, Michelle; University of Toronto, Family and Community Medicine |
| Keywords:                     | Health informatics < BIOTECHNOLOGY & BIOINFORMATICS, Cardiology < INTERNAL MEDICINE, MENTAL HEALTH, PRIMARY CARE, PREVENTIVE MEDICINE, Schizophrenia & psychotic disorders < PSYCHIATRY                                                                                                                                                                                                                                                                                                                                                                                                                                                            |
|                               |                                                                                                                                                                                                                                                                                                                                                                                                                                                                                                                                                                                                                                                    |

SCHOLARONE™  
Manuscripts

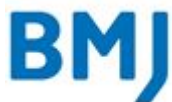

I, the Submitting Author has the right to grant and does grant on behalf of all authors of the Work (as defined in the below author licence), an exclusive licence and/or a non-exclusive licence for contributions from authors who are: i) UK Crown employees; ii) where BMJ has agreed a CC-BY licence shall apply, and/or iii) in accordance with the terms applicable for US Federal Government officers or employees acting as part of their official duties; on a worldwide, perpetual, irrevocable, royalty-free basis to BMJ Publishing Group Ltd ("BMJ") its licensees and where the relevant Journal is co-owned by BMJ to the co-owners of the Journal, to publish the Work in this journal and any other BMJ products and to exploit all rights, as set out in our [licence](#).

The Submitting Author accepts and understands that any supply made under these terms is made by BMJ to the Submitting Author unless you are acting as an employee on behalf of your employer or a postgraduate student of an affiliated institution which is paying any applicable article publishing charge ("APC") for Open Access articles. Where the Submitting Author wishes to make the Work available on an Open Access basis (and intends to pay the relevant APC), the terms of reuse of such Open Access shall be governed by a Creative Commons licence – details of these licences and which [Creative Commons](#) licence will apply to this Work are set out in our licence referred to above.

Other than as permitted in any relevant BMJ Author's Self Archiving Policies, I confirm this Work has not been accepted for publication elsewhere, is not being considered for publication elsewhere and does not duplicate material already published. I confirm all authors consent to publication of this Work and authorise the granting of this licence.

1  
2  
3 1  
4  
5 2  
6  
7 3 **Cardiovascular disease risk in patients with schizophrenia: retrospective cohort study of**  
8 4 **risk factor documentation and management in primary care electronic medical records**  
9

10 5 Braden O'Neill<sup>1,2,3</sup>, Sumeet Kalia<sup>2</sup>, Babak Aliarzadeh<sup>2</sup>, Frank Sullivan<sup>1,4</sup>, Rahim Moineddin<sup>3</sup>,  
11 6 Martina Kelly<sup>5</sup>, Michelle Greiver<sup>1,2,3</sup>  
12  
13 7

14  
15 8 <sup>1</sup>Department of Family and Community Medicine, North York General Hospital, Toronto,  
16 9 Ontario, Canada

17  
18 10 <sup>2</sup>University of Toronto Practice-Based Research Network, Toronto, Ontario, Canada

19  
20 11 <sup>3</sup>Department of Family and Community Medicine, Faculty of Medicine, University of Toronto,  
21 12 Ontario, Canada

22  
23 13 <sup>4</sup>School of Medicine, University of St. Andrews, Fife, Scotland

24  
25 14 <sup>5</sup>Department of Family Medicine, University of Calgary, Alberta, Canada  
26  
27  
28  
29

30 15  
31 16 Corresponding author:

32 17 Braden O'Neill

33 18 [braden.oneill@nygh.on.ca](mailto:braden.oneill@nygh.on.ca)  
34  
35  
36  
37  
38  
39  
40  
41

42 20 Funding: This study was funded by the Foundation for Advancing Family Medicine of the  
43 21 College of Family Physicians of Canada. Braden O'Neill completed this work during a Research  
44 22 Fellowship with the Medical Psychiatry Alliance, Toronto, Ontario.

45 23 Braden O'Neill and Michelle Greiver receive salary support from North York General Hospital  
46 24 and the Department of Family and Community Medicine, University of Toronto, Ontario,  
47 25 Canada.

48 26 There was no patient and public involvement in the design or conduct of this study.

49 27 Keywords: cardiovascular diseases; schizophrenia; primary health care; electronic health  
50 28 records; primary prevention

51 29 Word count: 2384  
52  
53  
54  
55  
56  
57  
58  
59  
60

## 32 Abstract

33 **Objectives:** In order to address the substantial increased risk of cardiovascular disease among  
34 people with schizophrenia, it is necessary to identify the factors responsible for some of that  
35 increased risk. We analyzed the extent to which these risk factors were documented in primary  
36 care electronic medical records, and compared their documentation by patient and provider  
37 characteristics.

38 **Design:** Retrospective cohort study

39 **Setting:** Electronic medical record (EMR) database of the University of Toronto Practice Based  
40 Research Network (UTOPIAN) Data Safe Haven.

41 **Participants:** 197129 adults between 40-75 years of age; 4882 with schizophrenia and 192247  
42 without.

43 **Primary and secondary outcome measures:** Documentation of cardiovascular disease risk  
44 factors (age, sex, smoking history, presence of diabetes, blood pressure, whether a patient is  
45 currently on medication to reduce blood pressure, total cholesterol, and high density lipoprotein  
46 cholesterol)

47 **Results:** Documentation of cardiovascular risk factors was more complete among people with  
48 schizophrenia (74.5% of whom had blood pressure documented at least once in the last two years  
49 versus 67.3% of those without,  $p > 0.0001$ ). Smoking status was not documented in 19.8% of  
50 those with schizophrenia and 20.8% of those without ( $p = 0.0843$ ). Factors associated with  
51 improved documentation included older patients (OR for age 70-75 vs 45-49 = 3.51, 95% CI  
52 3.26-3.78), male patients (OR = 1.39, 95% CI 1.33-1.45), patients cared for by a female provider  
53 (OR = 1.52, 95% CI: 1.12-2.07), and increased number of encounters (OR for  $\geq 10$  visits vs 3-5  
54 visits = 1.53, 95% CI 1.46-1.60).

55 **Conclusions:** Documentation of cardiovascular risk factors was better among people with  
56 schizophrenia than without, although overall documentation was inadequate. Efforts to improve  
57 documentation of risk factors are warranted in order to facilitate improved management.

58

59

60

61

62

1  
2  
3 63 **Article summary:**  
4  
5 64

- 6  
7 65 • This study analyzes data from the University of Toronto Practice-Based Research  
8 66 Network (UTOPIAN) Data Safe Haven, one of the world's largest primary care  
9 67 electronic medical record (EMR) databases  
10  
11  
12 68 • It uses de-identified data from primary care charts to identify cardiovascular disease risk  
13 69 factors  
14  
15 70 • Strengths of the study include the sample size and the breadth of data included, from  
16 71 approximately 400 primary care clinics in Ontario, Canada  
17  
18  
19 72 • Weaknesses include possible missing data resulting from the process of transferring data  
20 73 from primary care charts into a de-identified database, and the fact that the clinics  
21 74 included in the database are mainly urban and suburban academic clinics; these results  
22 75 may not necessarily be generalizable to all primary care settings  
23  
24  
25  
26  
27 76  
28 77  
29  
30 78  
31  
32 79  
33  
34 80  
35 81  
36  
37 82  
38  
39 83  
40 84  
41  
42 85  
43  
44 86  
45  
46 87  
47 88  
48  
49 89  
50  
51 90  
52  
53 91  
54 92  
55  
56  
57  
58  
59  
60

## 93 Introduction

94  
95 High quality, comprehensive data are needed to understand health and how to improve it. Risk  
96 factors must be known and documented so that interventions can be planned and implemented.

97 One of the key challenges in primary care research has been the availability and quality of data.  
98 When Julian Tudor Hart conducted research on patients accessing care in his practice in Wales in  
99 the 1970s, it required laboriously searching through individual paper charts to collect necessary  
100 data.(1) Today, electronic medical records are widely used and can facilitate instant searches at  
101 the practice level as well as at local and national levels through databases that aggregate data  
102 from multiple practices. However, several studies have demonstrated that important data – for  
103 example, regarding cardiovascular risk factors such as smoking and whether someone has a  
104 diagnosis of hypertension – remain incomplete.(2,3)

105 People with serious mental illnesses, particularly those with schizophrenia, die 8 to 10 years  
106 earlier than those without these conditions.(4,5) This is primarily due to higher rates of  
107 cardiovascular disease.(5-7) Medications used to treat schizophrenia may worsen risk factors  
108 associated with cardiovascular disease, such as obesity or hyperglycemia; patients may face  
109 challenges with self-care or accessing appropriate medical care.(8) To date there is sparse  
110 evidence about how to improve physical health status in these patients; a recent review of  
111 ‘collaborative care’ where both physical and mental health are attended to for these patients did  
112 not find any evidence of reductions in cardiovascular disease risk.(9)

113 The primary prevention of cardiovascular disease includes addressing risk factors such as  
114 tobacco use and hypertension; these are commonly managed in primary care. This is particularly  
115 true for people with serious mental illness, who are seen more frequently by family physicians  
116 than by psychiatrists.(10) The prevalence of schizophrenia in the general adult population is 1-  
117 3%, making it a relatively common condition.(11,12) The prevalence and frequency of  
118 interaction strongly supports the important role played by family medicine in reducing the risk of  
119 cardiovascular disease for people with mental illness. To do this effectively it is necessary to  
120 understand what that risk is and what variables should be focused on.

1  
2  
3 121 As a first step in establishing patients' physical health status and identifying who to target for  
4  
5 122 interventions to improve health, it is necessary to understand their health status . Whether data  
6  
7 123 completeness concerns regarding cardiovascular disease risk are general to all patients or  
8  
9 124 whether they are more pronounced amongst those with serious mental illness is unknown.

10  
11 125 Our study objectives were: to describe documentation of cardiovascular disease risk factors  
12  
13 126 (HDL, LDL, total cholesterol; blood pressure; smoking status) among patients with and without  
14  
15 127 schizophrenia; and to explore patient and provider characteristics associated with sufficient  
16  
17 128 documentation of these risk factors to calculate the Framingham risk score for patients with  
18  
19 129 schizophrenia.

20 130

## 21 131 **Methods**

22 132

23  
24  
25 133 This is an observational retrospective cohort study design. We applied the STrengthening the  
26  
27 134 Reporting of OBservational studies in Epidemiology checklist for reporting observational  
28  
29 135 studies.(13) Ethics approval was obtained from the North York General Hospital Research Ethics  
30  
31 136 Board, approval #18-0006.

32 137

### 33 138 *Setting and data sources*

34 139

35  
36  
37 140 We used data from the University of Toronto Practice-Based Research Network (UTOPIAN)  
38  
39 141 Data Safe Haven, a primary care electronic medical record (EMR) database; data extracted as of  
40  
41 142 April 1 2018 were used for this project.(14) The UTOPIAN Data Safe Haven contains EMR  
42  
43 143 records from over 550 000 patients who access care in primary care practices in the Greater  
44  
45 144 Toronto Area in Ontario, Canada. Physicians have consented to the provision of de-identified  
46  
47 145 data, housed in a secure environment. These data are used for quality improvement and research  
48  
49 146 purposes. The UTOPIAN database includes validated definitions for eight long-term conditions:  
50  
51 147 osteoarthritis, diabetes, epilepsy, parkinsonism, dementia, hypertension, COPD,  
52  
53 148 depression.(15,16) Neighbourhood level income quintiles are also available from patient  
54  
55 149 residential postal codes using Statistics Canada's Postal Code Conversion Files.(17,18)

56 150



151

*Study population*

153

154 We included patients 40-75 years of age because Canadian guidelines recommend regular  
155 screening for cardiovascular disease (CVD) risk in this age range. There is no clear consensus on  
156 the recommended interval for screening, which varies between yearly to every 5 years.(19-21)  
157 Guidelines suggest yearly CVD risk assessment for patients with schizophrenia (22); however  
158 these are not routinely followed in primary care practice and this increased frequency is  
159 consensus-based and not necessarily supported by strong evidence. We therefore chose to look at  
160 a two year interval in which screening could have taken place, recognizing that there may be  
161 some patients for whom it may be appropriate to screen less often. The most commonly used  
162 CVD risk assessment tool in Canadian primary care practice is the Framingham risk calculator  
163 (23), which includes the following items: (i) age, (ii) sex, (iii) smoking history, (iv) presence of  
164 diabetes, (v) systolic blood pressure (SBP), (vi) whether a patient is currently on medication to  
165 reduce blood pressure, (vii) total cholesterol, and (viii) high density lipoprotein (HDL)  
166 cholesterol. This is a validated risk stratification tool that establishes a patient's risk of  
167 developing cardiovascular disease (CVD; including: coronary death, myocardial infarction,  
168 coronary insufficiency, angina, ischemic stroke, hemorrhagic stroke, transient ischemic attack,  
169 peripheral artery disease, heart failure) within the next 10 years. It is valid for patients 30 – 74  
170 years of age.(23)

171

172 We identified patients that were 40-75 years of age as of March 31, 2018. We limited our cohort  
173 definition to those that had at least 3 primary care visits in the 2 year period between April 1,  
174 2016 and March 31, 2018. To identify outcomes we looked at whether people had CVD risk  
175 factors as outlined above documented at least once in the above period. This definition ensured  
176 that we included patients likely to be routinely followed by the providers whose records are  
177 included in the database, and is consistent with our usual approach for studies using this  
178 database. We identified patients with schizophrenia using the same definition used in a previous  
179 study using the same database, using a combination of encounter diagnoses used for billing  
180 purposes as well as documentation of the condition in the electronic medical record.(24)

181

1  
2  
3 1824  
5 183 *Statistical analysis*6  
7 184

8 185 We compared the documentation of cardiovascular disease (CVD) risk factors included in the  
9 186 Framingham risk calculator between those with and without schizophrenia using a chi-square  
10 187 test. In particular, the CVD risk factors included: HDL cholesterol, SBP, total cholesterol  
11 188 measured in the last two years of study follow-up, and whether smoking status had ever been  
12 189 recorded. The relationship between the complete documentation of all Framingham elements  
13 190 was also assessed with respect to patient characteristics (age, sex, number of encounters in two  
14 191 years of study follow-up, diagnosis of schizophrenia, most recent body mass index in the last two  
15 192 years of study follow-up), provider characteristics (age, sex) and geographical characteristics  
16 193 (income quintiles, rurality). A mixed-effects multilevel logistic regression was used to estimate  
17 194 unadjusted and adjusted odds ratios for the complete documentation of all Framingham elements  
18 195 (i.e. calculable Framingham score). Providers were specified as a random effect in the regression  
19 196 model.

20  
21 197

22 198 All statistical analyses were generated using SAS software, version 9.4 M4 (SAS Institute). A  
23 199 fixed nominal level of 0.05 was used to determine statistical significance in this study.

24  
25 200

## 26 201 **Results**

### 27 202 *Cohort generation*

28  
29 203

30 204 Data from 376 physicians practicing in 96 different clinic sites were included. In total, 197,309  
31 205 patients were identified with age between 40-75 years old (as of March 31, 2018), recorded sex  
32 206 and had at least 3 visits in the two years of interest (Figure 1). Out of 197,309 patients, 83,064  
33 207 patients (40.4%) had adequate data to calculate a Framingham risk score using the most recent  
34 208 data available for HDL, SBP, and total cholesterol in the last 2 years and smoking status ever  
35 209 recorded. Of these, 4880 patients met the definition of schizophrenia and 2130 (43.8%) of these  
36 210 patients with schizophrenia had complete documentation to calculate the Framingham risk score.

37  
38 211

39 212 FIGURE 1 HERE

1  
2  
3 2134  
5 214 *Individual Framingham Data Elements*6  
7 215

8 216 We compared the presence of individual Framingham elements between 4882 patients with  
9 217 schizophrenia and 192247 patients without, over a two year look back window (April 1, 2016 –  
10 218 March 31, 2018) (Table 1). Framingham elements were documented more completely among  
11 219 those with schizophrenia: 25.5% of those with schizophrenia and 32.7% of those without had no  
12 220 documented blood pressure readings over the last two years ( $p < 0.0001$ ). 39.2% of those with  
13 221 schizophrenia and 42.1% of those without did not have any cholesterol readings ( $p < 0.0001$ ).  
14 222 There was no difference in documentation of smoking status between the two groups ( $p = 0.084$ ),  
15 223 with documentation missing in approximately 20% of all charts.  
16 224

17  
18  
19  
20  
21  
22 22523  
24 226 TABLE 1 HERE25  
26 22727 228 *Patient, provider and geographical characteristics as predictors of calculable Framingham*  
28 229 *score*29  
30  
31 230

32 231 Overall, patients with schizophrenia appeared to have decreased adjusted odds for the complete  
33 232 documentation of Framingham score as compared to patients without schizophrenia, but this was  
34 233 not statistically significant (OR = 0.90, 95% CI 0.79 – 1.01,  $p$ -value=0.07) (Figure 2). Individual  
35 234 patient characteristics between those who had complete documentation of Framingham score  
36 235 factors and those who did not are in Table 2. The adjusted odds for the complete documentation  
37 236 of Framingham factors increased with respect to the patient's age (70-75 years vs 40-44 years  
38 237 OR = 3.51, 95% CI 3.26 – 3.78). Male patients had increased adjusted odds of calculable  
39 238 Framingham score as compared to female patients (male vs. female OR = 1.39, 95% CI 1.33 –  
40 239 1.45). An increase in the BMI level was associated with an increase in adjusted odds for  
41 240 calculable Framingham score (Obese class III vs. Underweight, OR = 2.00, 95% CI 1.66 – 2.43)  
42 241 (Table 3). An increase in the total number of encounters also led to increased adjusted odds for  
43 242 the complete documentation of Framingham factors (more than 10 visits vs. 3-5 visits in last two  
44 243 years OR = 1.53, 95% CI 1.46 – 1.60).

45  
46  
47  
48  
49  
50  
51  
52  
53  
54  
55  
56  
57  
58  
59  
60

1  
2  
3 244 TABLE 2 HERE  
4

5 245 Patients residing in urban regions had higher adjusted odds for the complete documentation of  
6 246 Framingham factors as compared to patients residing in rural regions (OR=1.08, 95% CI: 1.02 –  
7 247 1.16). However, no significant differences in adjusted odds ratios were detected across the five  
8  
9 248 levels of income quintiles (1 vs 5, OR=0.97, 95% CI: 0.91-1.03, p-value=0.38). Female  
10 249 physicians had increased adjusted odds for the complete documentation of Framingham factors  
11  
12 250 as compared to male physicians (OR=1.52, 95% CI: 1.12 – 2.07). However, provider age did not  
13  
14 251 contribute to increased or decreased adjusted odds for calculable Framingham score (29-39 years  
15  
16 252 vs. 60+ years, OR=1.49, 95% CI: 0.98 – 2.26, p-value=0.06).  
17  
18

19 253 TABLE 3 HERE  
20

21 254  
22

## 23 255 **Discussion** 24

25 256  
26

27 257 In this study of primary care electronic medical records from the University of Toronto Practice-  
28  
29 258 Based Research Network, we found better documentation of cardiovascular risk factors among  
30  
31 259 people with schizophrenia as opposed to those without the condition. However, overall  
32  
33 260 documentation was inadequate.  
34

35 261 Other studies on preventive health for people with schizophrenia, such as those addressing  
36  
37 262 cancer screening, have found lower rates of preventive care when compared with the general  
38  
39 263 population.(25) We actually found more complete documentation of some risk factors among  
40  
41 264 people with schizophrenia when compared to those without, such as blood pressure. There are  
42  
43 265 various recommendations for frequency of cardiovascular disease risk screening in the general  
44  
45 266 population; Allan et al suggested every 5 years for men over 40 and women over 50.(21) More  
46  
47 267 complete documentation of risk factors would be expected based on guidelines suggesting more  
48  
49 268 frequent cardiovascular disease risk assessment among people who are on antipsychotic  
50  
51 269 medication.(12) To some extent the present study demonstrates a promising finding, suggesting  
52  
53 270 that patients with schizophrenia are receiving at least as good care from this perspective as those  
54  
55 271 without the condition. It is, however, quite concerning that there are substantial gaps in  
56  
57 272 documentation of particular risk factors such as smoking cessation. Nearly 20% of patients did  
58  
59 273 not have smoking status documented in the chart. We suggest that if it is not documented, then it  
60

1  
2  
3 274 is extremely unlikely that smoking cessation has been addressed at a primary care visit. Smoking  
4  
5 275 is highly prevalent among people with schizophrenia; Canadian estimates range from 47% (26)  
6  
7 276 and 78% (27). There are many effective interventions to support patients with schizophrenia to  
8  
9 277 stop smoking.(28) It is therefore essential to document smoking status for all patients with  
10  
11 278 schizophrenia and to make smoking cessation a priority.

12  
13 279 We found several factors associated with what we assessed to be ‘appropriate’ documentation of  
14  
15 280 risk factors sufficient for cardiovascular risk assessment.

16  
17 281 Limitations of this study include the use of EMR data, which is known to have deficiencies  
18  
19 282 around data quality and completeness.(29,30) UTOPIAN, as part of the Canadian Primary Care  
20  
21 283 Sentinel Surveillance Network, is disproportionately comprised of more providers in academic  
22  
23 284 practices and has an older population than the Canadian average.(31) These findings therefore  
24  
25 285 may not be generalizable to all Canadian primary care settings. UTOPIAN contains data from  
26  
27 286 multiple EMR vendors and as a consequence there is the possibility that some data may be  
28  
29 287 missing as a result of errors in database formation; these data are extracted with the best  
30  
31 288 available approaches and regular data cleaning attempts to minimize these errors. Other studies  
32  
33 289 have found some deficiencies, particularly related to documentation of health conditions, in  
34  
35 290 EMR data in the Canadian setting.(3) There are no Canadian national standards for necessary  
36  
37 291 elements of EMR documentation in primary care. In Ontario, laboratory results enter most  
38  
39 292 physicians’ EMRs through the Ontario Laboratory Information System (32) which is an  
40  
41 293 automatic process, reducing the extent to which documentation is incomplete because of  
42  
43 294 provider error. Our focus on ‘documentation’ in this study is as a result of the practical principle  
44  
45 295 that if something is not documented, it cannot be acted on; therefore data documentation and  
46  
47 296 completeness are being taken as a proxy for their consideration in clinical decision-making. It is  
48  
49 297 not possible from the data considered in this study to ascertain whether a provider has attempted  
50  
51 298 to intervene towards smoking cessation, or whether someone has addressed blood pressure  
52  
53 299 management. There are other available risk stratification approaches available both for the  
54  
55 300 general population [such as QRISK2 (33)] and specifically for people with serious mental illness  
56  
57 301 [PRIMROSE (34)]. We chose to focus on the Framingham assessment because it is the most  
58  
59 302 commonly used in Canadian primary care and therefore would be most relevant to the study  
60  
303 context.

1  
2  
3 304 In summary, we found slightly more complete documentation of cardiovascular risk factors and  
4  
5 305 their management among people with schizophrenia as opposed to those without this condition.  
6  
7 306 However, overall documentation of these risk factors remains incomplete. Adequate  
8  
9 307 cardiovascular disease risk assessment is essential to identifying and addressing risk factors,  
10  
11 308 particularly among people with schizophrenia who have much higher mortality from  
12  
13 309 cardiovascular disease (and other conditions) than the general public. Efforts should be  
14  
15 310 undertaken in primary care to improve data completeness and CVD risk assessment and  
16  
17 311 management.

18 312  
19  
20 313 **Conflicts of interest:** All authors report that they have no conflicts of interest to declare.

21  
22  
23 314 **Data statement:** Data from this study are held by the University of Toronto Practice-Based  
24  
25 315 Research Network; ethics approval for this study does not allow unrestricted public access to the  
26  
27 316 data. Please contact the corresponding author for information on how to access.

28  
29 317 **Author statement:** BO, SK, BA, FS, RM, MK, MG contributed to the initial conception of the  
30  
31 318 study. BO, SK, BA, RM made substantial contributions to the statistical methodology, analysis  
32  
33 319 and data interpretation. BO and SK wrote the first draft of the manuscript. BO, SK, BA, FS, MK,  
34  
35 320 MG provided substantial revisions to the manuscript.

36 321

37 322

38 323

39 324

40 325

41 326

42 327

43 328

44 329

330 **References**

- 331 1. Hart JT. The inverse care law. *Lancet*. 1971 Feb 27;297(7696):405-12.
- 332 333 2. Greiver M, Aliarzadeh B, Meaney C, Moineddin R, Southgate CA, Barber DT, White  
334 DG, Martin KB, Ikhtiar T, Williamson T. Are we asking patients if they smoke? Missing  
335 information on tobacco use in Canadian electronic medical records. *Am J Prevent Med*.  
336 2015 Aug 31;49(2):264-8.
- 337 338 3. Singer A, Yakubovich S, Kroeker AL, Dufault B, Duarte R, Katz A. Data quality of  
339 electronic medical records in Manitoba: do problem lists accurately reflect chronic  
340 disease billing diagnoses? *J Am Med Inform Assoc*. 2016 Apr 23;23(6):1107-12.
- 341 342 4. Walker ER, McGee RE, Druss BG. Mortality in mental disorders and global disease  
343 burden implications: a systematic review and meta-analysis. *JAMA Psych*. 2015 Apr  
344 1;72(4):334-41.
- 345 346 5. Gatov E, Rosella L, Chiu M, Kurdyak P. Trends in standardized mortality among  
347 individuals with schizophrenia, 1993–2012: a population-based, repeated cross-sectional  
348 study. *CMAJ* 2017;189:e1177-87.
- 349 350 6. Hennekens CH, Hennekens AR, Hollar D, Casey DE. Schizophrenia and increased risks  
351 of cardiovascular disease. *Am Heart J*. 2005 Dec 31;150(6):1115-21.
- 352 353 7. Goldstein BI, Fagiolini A, Houck P, Kupfer DJ. Cardiovascular disease and hypertension  
354 among adults with bipolar I disorder in the United States. *Bipolar Disor*. 2009 Sep  
355 1;11(6):657-62.
- 356 357 8. De Hert M, Dekker JM, Wood D, Kahl KG, Holt RI, Möller HJ. Cardiovascular disease  
358 and diabetes in people with severe mental illness position statement from the European  
359 Psychiatric Association (EPA), supported by the European Association for the Study of  
360 Diabetes (EASD) and the European Society of Cardiology (ESC). *European Psych*. 2009  
361 Sep 1;24(6):412-24.
- 362 363 9. Bullock HL, Waddell K, & Wilson MG. Rapid synthesis: Identifying and assessing core  
364 components of collaborative-care models for treating mental and physical health  
365 conditions. Hamilton, Canada: McMaster Health Forum, 31 March 2017.
- 366 367 10. Slomp M, Bland R, Patterson S, Whittaker L. Three-year physician treated prevalence  
368 rate of mental disorders in Alberta. *Can J Psych*. 2009 Mar;54(3):199-203.

- 1  
2  
3 371 11. Government of Canada [Internet]: Ottawa, ON. Chapter 3: Schizophrenia – A report on  
4 372 mental illnesses in Canada. 2012. [cited 31 January 2018] Available from:  
5 373 [https://www.canada.ca/en/public-health/services/reports-publications/report-on-mental-](https://www.canada.ca/en/public-health/services/reports-publications/report-on-mental-illnesses-canada/schizophrenia.htm)  
6 374 [illnesses-canada/schizophrenia.htm](https://www.canada.ca/en/public-health/services/reports-publications/report-on-mental-illnesses-canada/schizophrenia.htm)  
7 375
- 8  
9 376 12. Saha S, Chant D, Welham J, McGrath J. A systematic review of the prevalence of  
10 377 schizophrenia. *PLoS medicine*. 2005 May 31;2(5):e141.  
11 378
- 12 379 13. von Elm E , Altman DG , Egger M , et al. The Strengthening the Reporting of  
13 380 Observational Studies in Epidemiology (STROBE) Statement: guidelines for reporting  
14 381 observational studies. *Int J Surg* 2014;12:1495–9.doi:10.1016/j.ijvsu.2014.07.013  
15 382
- 16 383 14. University of Toronto Department of Family and Community Medicine [Internet].  
17 384 University of Toronto Practice Based Research Network (UTOPIAN). [cited 31 January  
18 385 2018] Available from: <https://www.dfc.utoronto.ca/landing-page/utopian>  
19 386
- 20 387 15. CPCSSN Team, Case Definitions: Canadian Primary Care Sentinel Surveillance Network  
21 388 (CPCSSN), Version 2. July 16, 2019. URL: [http://cpcssn.ca/research-resources/cpcssn-](http://cpcssn.ca/research-resources/cpcssn-case-definitions-v2)  
22 389 [case-definitions-v2](http://cpcssn.ca/research-resources/cpcssn-case-definitions-v2)  
23 390
- 24 391 16. Williamson T, Green ME, Birtwhistle R, Khan S, Garies S, Wong ST, Natarajan N,  
25 392 Manca D, Drummond N. Validating the 8 CPCSSN case definitions for chronic disease  
26 393 surveillance in a primary care database of electronic health records. *Ann Fam Med*. 2014  
27 394 Jul 1;12(4):367-72.  
28 395
- 29 396 17. Wilkins R. Use of postal codes and addresses in the analysis of health data. *Health*  
30 397 *Reports*. 1993;5(2):157–77. pmid:8292756  
31 398
- 32 399 18. Pampalon R, Hamel D, Gamache P, Raymond G. A deprivation index for health planning  
33 400 in Canada. *Chronic Dis Can*. 2009 Jan 1;29(4):178–91. pmid:1980468  
34 401
- 35 402 19. Genest J, McPherson R, Frohlich J, Anderson T, Campbell N, Carpentier A, Couture P,  
36 403 Dufour R, Fodor G, Francis GA, Grover S. 2009 Canadian Cardiovascular  
37 404 Society/Canadian guidelines for the diagnosis and treatment of dyslipidemia and  
38 405 prevention of cardiovascular disease in the adult–2009 recommendations. *Canadian*  
39 406 *Journal of Cardiology*. 2009 Oct 1;25(10):567-79.  
40 407
- 41 408 20. Anderson TJ, Grégoire J, Hegele RA, Couture P, Mancini GJ, McPherson R, Francis GA,  
42 409 Poirier P, Lau DC, Grover S, Genest Jr J. 2012 update of the Canadian Cardiovascular  
43 410 Society guidelines for the diagnosis and treatment of dyslipidemia for the prevention of  
44  
45  
46  
47  
48  
49  
50  
51  
52  
53  
54  
55  
56  
57  
58  
59  
60



- 1  
2  
3 411 cardiovascular disease in the adult. *Canadian Journal of Cardiology*. 2013 Feb  
4 412 1;29(2):151-67.  
5 413  
6  
7  
8 414 21. Allan GM, Lindblad AJ, Comeau A, Coppola J, Hudson B, Mannarino M, McMinis C,  
9 415 Padwal R, Schelstraete C, Zarnke K, Garrison S. Simplified lipid guidelines: Prevention  
10 416 and management of cardiovascular disease in primary care. *Canadian Family Physician*.  
11 417 2015 Oct 1;61(10):857-67.  
12  
13 418  
14 419 22. Pringsheim T, Kelly M, Urness D, Teehan M, Ismail Z, Gardner D. Physical Health and  
15 420 Drug Safety in individuals with schizophrenia. *Can J Psych*. 2017 Sep;62(9):673-83.  
16 421  
17  
18 422 23. D'Agostino RB, Vasan RS, Pencina MJ, Wolf PA, Cobain M, Massaro JM, Kannel WB.  
19 423 General cardiovascular risk profile for use in primary care. *Circulation*. 2008 Feb  
20 424 12;117(6):743-53.  
21 425  
22  
23 426 24. O'Neill B, Kalia S, Aliarzadeh B, Moineddin R, Fung WL, Sullivan F, Maloul A,  
24 427 Bernard S, Greiver M. Agreement between primary care and hospital diagnosis of  
25 428 schizophrenia and bipolar disorder: A cross-sectional, observational study using record  
26 429 linkage. *PLOS One*. 2019 Jan 7;14(1):e0210214.  
27  
28 430  
29 431 25. Martens PJ, Chochinov HM, Prior HJ, Fransoo R, Burland E, Team TN. Are cervical  
30 432 cancer screening rates different for women with schizophrenia? A Manitoba population-  
31 433 based study. *Schizophrenia research*. 2009 Aug 1;113(1):101-6.  
32  
33 434  
34  
35 435 26. Johnson JL, Ratner PA, Malchy LA, Okoli CT, Procyshyn RM, Bottorff JL, Groening M,  
36 436 Schultz A, Osborne M. Gender-specific profiles of tobacco use among non-  
37 437 institutionalized people with serious mental illness. *BMC psychiatry*. 2010  
38 438 Dec;10(1):101.  
39  
40 439  
41  
42 440 27. Gerber, G.J., Krupa, T., Eastabrook, S., Gargaro, J., 2003. Substance use among persons  
43 441 with serious mental illness in eastern Ontario. *Can J Community Ment Health* 22, 113 –  
44 442 128.  
45 443  
46  
47 444 28. Tsoi DT, Porwal M, Webster AC. Interventions for smoking cessation and reduction in  
48 445 individuals with schizophrenia. *Cochrane Database Sys Rev*. 2013(2).  
49 446  
50  
51 447 29. Weiskopf NG, Weng C. Methods and dimensions of electronic health record data quality  
52 448 assessment: enabling reuse for clinical research. *J Am Inform Assoc*. 2013 Jan  
53 449 1;20(1):144-51.  
54 450  
55  
56  
57  
58  
59  
60

- 1  
2  
3 451 30. Birtwhistle R, Williamson T. Primary care electronic medical records: a new data source  
4 452 for research in Canada. CMAJ. 2015 Mar 3;187(4):239-40.  
5 453  
6 454 31. Queenan JA, Williamson T, Khan S, Drummond N, Garies S, Morkem R, Birtwhistle R.  
7 455 Representativeness of patients and providers in the Canadian Primary Care Sentinel  
8 456 Surveillance Network: a cross-sectional study. CMAJ Open. 2016 Jan;4(1):E28.  
9 457  
10 458 32. Ontario Laboratory Information System. eHealth Ontario.  
11 459 [https://www.ehealthontario.on.ca/en/for-healthcare-professionals/ontario-laboratories-  
13 461 information-system-olis](https://www.ehealthontario.on.ca/en/for-healthcare-professionals/ontario-laboratories-<br/>12 460 information-system-olis)  
14 462  
15 463 33. Hippisley-Cox J, Coupland C, Vinogradova Y, Robson J, Brindle P. Performance of the  
16 464 QRISK cardiovascular risk prediction algorithm in an independent UK sample of patients  
17 465 from general practice: a validation study. Heart. 2008 Jan 1;94(1):34-9.  
18 466  
19 467 34. Zomer E, Osborn D, Nazareth I, Blackburn R, Burton A, Hardoon S, Holt RI, King M,  
20 468 Marston L, Morris S, Omar R. Effectiveness and cost-effectiveness of a cardiovascular  
21 469 risk prediction algorithm for people with severe mental illness (PRIMROSE). BMJ open.  
22 470 2017 Sep 1;7(9):e018181.  
23 471  
24 472  
25 473  
26 474  
27 475  
28 476  
29 477  
30 478  
31 479  
32 480  
33 481  
34 482  
35 483  
36 484  
37 485  
38 486  
39 487  
40 488  
41 489  
42 490  
43 491  
44 492  
45 493  
46 494

1  
2  
3  
4  
5  
6  
7  
8  
9  
10  
11  
12  
13  
14  
15  
16  
17  
18  
19  
20  
21  
22  
23  
24  
25  
26  
27  
28  
29  
30  
31  
32  
33  
34  
35  
36  
37  
38  
39  
40  
41  
42  
43  
44  
45  
46  
47  
48  
49  
50  
51  
52  
53  
54  
55  
56  
57  
58  
59  
60

495 **Figures and tables**

496  
497  
498  
499

Figure 1. Cohort generation

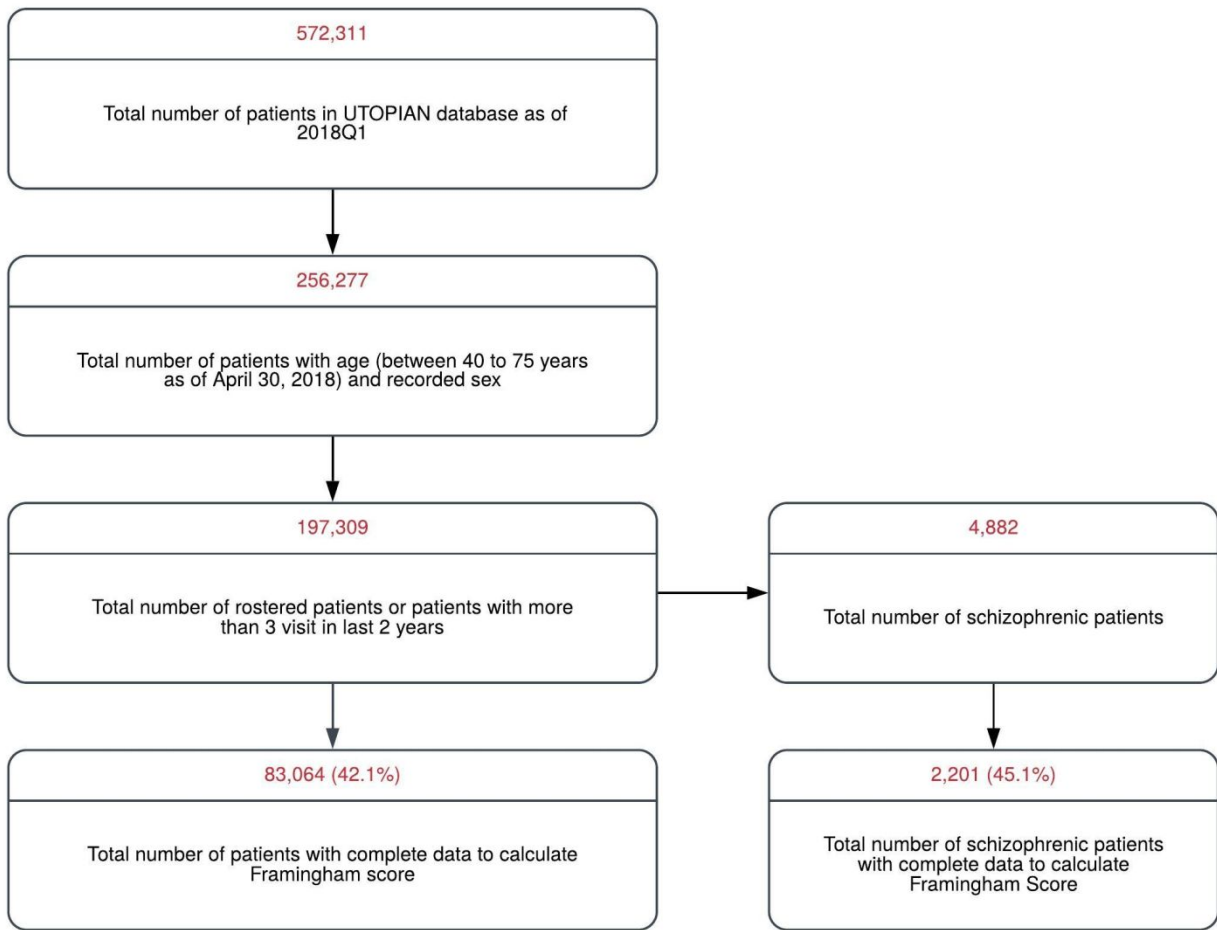

500  
501  
502  
503  
504  
505  
506  
507  
508  
509  
510  
511  
512

513 Table 1. Distribution of Framingham factors among patients with and without schizophrenia

|                                       | Schizophrenia |                    |      |                    | P-values* |
|---------------------------------------|---------------|--------------------|------|--------------------|-----------|
|                                       | No            |                    | Yes  |                    |           |
|                                       | N             | Column Percent (%) | N    | Column Percent (%) |           |
| <b>Age range (years)</b>              |               |                    |      |                    | -         |
| 40-44 years                           | 28574         | 14.8%              | 700  | 14.3%              |           |
| 45-49 years                           | 29137         | 15.1%              | 753  | 15.4%              |           |
| 50-54 years                           | 30939         | 16.1%              | 784  | 16.1%              |           |
| 55-59 years                           | 31790         | 16.5%              | 832  | 17.0%              |           |
| 60-64 years                           | 27061         | 14.1%              | 707  | 14.5%              |           |
| 65-69 years                           | 22430         | 11.7%              | 588  | 12.0%              |           |
| 70-75 years                           | 22496         | 11.7%              | 518  | 10.6%              |           |
| <b>Sex (M/F)</b>                      |               |                    |      |                    | -         |
| Female                                | 106841        | 55.5%              | 2539 | 52.0%              |           |
| Male                                  | 85586         | 44.5%              | 2343 | 48.0%              |           |
| <b>HDL level (mmol/L)</b>             |               |                    |      |                    | <0.0001   |
| Missing                               | 79437         | 41.3%              | 1842 | 37.7%              |           |
| 0-0.89 mmol/L                         | 8565          | 4.5%               | 375  | 7.7%               |           |
| 0.9-1.19 mmol/L                       | 27925         | 14.5%              | 866  | 17.7%              |           |
| 1.2-1.29 mmol/L                       | 11006         | 5.7%               | 272  | 5.6%               |           |
| 1.3-1.59 mmol/L                       | 28313         | 14.7%              | 703  | 14.4%              |           |
| 1.60+ mmol/L                          | 37181         | 19.3%              | 824  | 16.9%              |           |
| <b>Total cholesterol (mmol/L)</b>     |               |                    |      |                    | <0.0001   |
| Missing                               | 81073         | 42.1%              | 1916 | 39.2%              |           |
| 0-4.09 mmol/L                         | 25388         | 13.2%              | 865  | 17.7%              |           |
| 4.1-5.19 mmol/L                       | 39801         | 20.7%              | 1068 | 21.9%              |           |
| 5.2-6.19 mmol/L                       | 30009         | 15.6%              | 663  | 13.6%              |           |
| 6.2-7.19 mmol/L                       | 11225         | 5.8%               | 252  | 5.2%               |           |
| 7.2+ mmol/L                           | 4931          | 2.6%               | 118  | 2.4%               |           |
| <b>Systolic blood pressure (mmHg)</b> |               |                    |      |                    | <0.0001   |
| Missing                               | 62934         | 32.7%              | 1245 | 25.5%              |           |
| 120 mmHg or less                      | 42293         | 22.0%              | 1445 | 29.6%              |           |
| 120-129 mmHg                          | 36752         | 19.1%              | 940  | 19.3%              |           |
| 130-139 mmHg                          | 28764         | 14.9%              | 725  | 14.9%              |           |
| 140-149 mmHg                          | 14043         | 7.3%               | 350  | 7.2%               |           |
| 150-159 mmHg                          | 5752          | 3.0%               | 124  | 2.5%               |           |
| 160 mmHg or more                      | 1889          | 1.0%               | 53   | 1.1%               |           |
| <b>Smoking Status</b>                 |               |                    |      |                    | 0.0843    |
| Missing                               | 40109         | 20.8%              | 968  | 19.8%              |           |
| Non-smoker                            | 125796        | 65.4%              | 2633 | 53.9%              |           |
| Smoker                                | 26522         | 13.8%              | 1281 | 26.2%              |           |
| <b>Type II Diabetes Mellitus</b>      |               |                    |      |                    | -         |
| No                                    | 168151        | 87.4%              | 3953 | 81.0%              |           |
| Yes                                   | 24276         | 12.6%              | 929  | 19.0%              |           |
| <b>Anti-Hypertensive medication</b>   |               |                    |      |                    | -         |
| No                                    | 140415        | 73.0%              | 3486 | 71.4%              |           |

|              | Schizophrenia |                    |      |                    | P-values* |
|--------------|---------------|--------------------|------|--------------------|-----------|
|              | No            |                    | Yes  |                    |           |
|              | N             | Column Percent (%) | N    | Column Percent (%) |           |
| Yes          | 52012         | 27.0%              | 1396 | 28.6%              |           |
| <b>Total</b> | 192427        | 100.0%             | 4882 | 100.0%             | -         |

514 \*p-values compare the proportion of missing data and non-missing data with respect to schizophrenia (using chi-square  
515 test).

516

517

518 Table 2. Calculable Framingham score with respect to individual Framingham factors

|                                       | Calculable Framingham Score |                 |       |                 | Total<br>N |
|---------------------------------------|-----------------------------|-----------------|-------|-----------------|------------|
|                                       | No                          |                 | Yes   |                 |            |
|                                       | N                           | Row Percent (%) | N     | Row Percent (%) |            |
| <b>Age range (years)</b>              |                             |                 |       |                 |            |
| 40-44 years                           | 21922                       | 74.9%           | 7352  | 25.1%           | 29274      |
| 45-49 years                           | 20367                       | 68.1%           | 9523  | 31.9%           | 29890      |
| 50-54 years                           | 19024                       | 60.0%           | 12699 | 40.0%           | 31723      |
| 55-59 years                           | 18106                       | 55.5%           | 14516 | 44.5%           | 32622      |
| 60-64 years                           | 14143                       | 50.9%           | 13625 | 49.1%           | 27768      |
| 65-69 years                           | 10565                       | 45.9%           | 12453 | 54.1%           | 23018      |
| 70-75 years                           | 10118                       | 44.0%           | 12896 | 56.0%           | 23014      |
| <b>Sex (M/F)</b>                      |                             |                 |       |                 |            |
| Female                                | 63352                       | 57.9%           | 46028 | 42.1%           | 109380     |
| Male                                  | 50893                       | 57.9%           | 37036 | 42.1%           | 87929      |
| <b>HDL level (mmol/L)</b>             |                             |                 |       |                 |            |
| Missing                               | 81279                       | 100.0%          | .     | .               | 81279      |
| 0-0.89 mmol/L                         | 2408                        | 26.9%           | 6532  | 73.1%           | 8940       |
| 0.9-1.19 mmol/L                       | 7973                        | 27.7%           | 20818 | 72.3%           | 28791      |
| 1.2-1.29 mmol/L                       | 3092                        | 27.4%           | 8186  | 72.6%           | 11278      |
| 1.3-1.59 mmol/L                       | 8069                        | 27.8%           | 20947 | 72.2%           | 29016      |
| 1.60+ mmol/L                          | 11424                       | 30.1%           | 26581 | 69.9%           | 38005      |
| <b>Total cholesterol (mmol/L)</b>     |                             |                 |       |                 |            |
| Missing                               | 82989                       | 100.0%          | .     | .               | 82989      |
| 0-4.09 mmol/L                         | 6336                        | 24.1%           | 19917 | 75.9%           | 26253      |
| 4.1-5.19 mmol/L                       | 11400                       | 27.9%           | 29469 | 72.1%           | 40869      |
| 5.2-6.19 mmol/L                       | 8686                        | 28.3%           | 21986 | 71.7%           | 30672      |
| 6.2-7.19 mmol/L                       | 3167                        | 27.6%           | 8310  | 72.4%           | 11477      |
| 7.2+ mmol/L                           | 1667                        | 33.0%           | 3382  | 67.0%           | 5049       |
| <b>Systolic blood pressure (mmHg)</b> |                             |                 |       |                 |            |
| Missing                               | 62874                       | 98.0%           | 1305  | 2.0%            | 64179      |
| 120 mmHg or less                      | 18185                       | 41.6%           | 25553 | 58.4%           | 43738      |
| 120-129 mmHg                          | 14338                       | 38.0%           | 23354 | 62.0%           | 37692      |
| 130-139 mmHg                          | 10431                       | 35.4%           | 19058 | 64.6%           | 29489      |
| 140-149 mmHg                          | 5359                        | 37.2%           | 9034  | 62.8%           | 14393      |
| 150-159 mmHg                          | 2270                        | 38.6%           | 3606  | 61.4%           | 5876       |
| 160 mmHg or more                      | 788                         | 40.6%           | 1154  | 59.4%           | 1942       |

|                                     | Calculable Framingham Score |                 |       |                 | Total<br>N |
|-------------------------------------|-----------------------------|-----------------|-------|-----------------|------------|
|                                     | No                          |                 | Yes   |                 |            |
|                                     | N                           | Row Percent (%) | N     | Row Percent (%) |            |
| <b>Smoking Status</b>               |                             |                 |       |                 |            |
| Missing                             | 41077                       | 100.0%          | .     | .               | 41077      |
| Non-smoker                          | 58342                       | 45.4%           | 70087 | 54.6%           | 128429     |
| Smoker                              | 14826                       | 53.3%           | 12977 | 46.7%           | 27803      |
| <b>Type II Diabetes Mellitus</b>    |                             |                 |       |                 |            |
| No                                  | 105354                      | 61.2%           | 66750 | 38.8%           | 172104     |
| Yes                                 | 8891                        | 35.3%           | 16314 | 64.7%           | 25205      |
| <b>Anti-Hypertensive medication</b> |                             |                 |       |                 |            |
| No                                  | 92342                       | 64.2%           | 51559 | 35.8%           | 143901     |
| Yes                                 | 21903                       | 41.0%           | 31505 | 59.0%           | 53408      |
| <b>Total</b>                        | 114245                      | 57.9%           | 83064 | 42.1%           | 197309     |

519  
520  
521  
522  
523 Table 3: Calculable Framingham score with respect to patient, provider and geographical  
524 characteristics

|                                     | Calculable Framingham Score |                 |       |                 | Total<br>N |
|-------------------------------------|-----------------------------|-----------------|-------|-----------------|------------|
|                                     | No                          |                 | Yes   |                 |            |
|                                     | N                           | Row Percent (%) | N     | Row Percent (%) |            |
| <b>Schizophrenia</b>                |                             |                 |       |                 |            |
| No                                  | 111564                      | 58.0%           | 80863 | 42.0%           | 192427     |
| Yes                                 | 2681                        | 54.9%           | 2201  | 45.1%           | 4882       |
| <b>BMI level (Kg/m<sup>2</sup>)</b> |                             |                 |       |                 |            |
| Missing                             | 84398                       | 77.7%           | 24206 | 22.3%           | 108604     |
| 18.4 or less (Underweight)          | 378                         | 42.9%           | 503   | 57.1%           | 881        |
| 18.5 - 24.9 (Normal)                | 9191                        | 38.6%           | 14619 | 61.4%           | 23810      |
| 25 - 29.9 (overweight)              | 10622                       | 32.6%           | 21935 | 67.4%           | 32557      |
| 30 - 34.9 (Obese Class I)           | 5847                        | 30.5%           | 13331 | 69.5%           | 19178      |
| 35 - 39.9 (Obese Class II)          | 2306                        | 30.4%           | 5279  | 69.6%           | 7585       |
| 40 or more (Obese Class III)        | 1503                        | 32.0%           | 3191  | 68.0%           | 4694       |
| <b>No. of encounters</b>            |                             |                 |       |                 |            |
| Missing                             | 42673                       | 86.0%           | 6952  | 14.0%           | 49625      |
| 3-5 visits                          | 25915                       | 58.6%           | 18311 | 41.4%           | 44226      |
| 6-9 visits                          | 19861                       | 48.8%           | 20830 | 51.2%           | 40691      |
| >=10 visits                         | 25796                       | 41.1%           | 36971 | 58.9%           | 62767      |
| <b>Income Quintiles</b>             |                             |                 |       |                 |            |
| Missing                             | 14795                       | 58.9%           | 10326 | 41.1%           | 25121      |
| 1                                   | 15851                       | 58.7%           | 11162 | 41.3%           | 27013      |
| 2                                   | 15883                       | 58.3%           | 11348 | 41.7%           | 27231      |
| 3                                   | 17118                       | 58.2%           | 12281 | 41.8%           | 29399      |
| 4                                   | 20810                       | 57.8%           | 15221 | 42.2%           | 36031      |
| 5                                   | 29788                       | 56.7%           | 22726 | 43.3%           | 52514      |

|                     | Calculable Framingham Score |                 |       |                 | Total<br>N |
|---------------------|-----------------------------|-----------------|-------|-----------------|------------|
|                     | No                          |                 | Yes   |                 |            |
|                     | N                           | Row Percent (%) | N     | Row Percent (%) |            |
| <b>Region</b>       |                             |                 |       |                 |            |
| Missing             | 2284                        | 73.6%           | 819   | 26.4%           | 3103       |
| Rural               | 11590                       | 59.7%           | 7833  | 40.3%           | 19423      |
| Urban               | 100371                      | 57.4%           | 74412 | 42.6%           | 174783     |
| <b>Provider age</b> |                             |                 |       |                 |            |
| Missing             | 5880                        | 50.6%           | 5741  | 49.4%           | 11621      |
| 29-39 years         | 21926                       | 54.1%           | 18618 | 45.9%           | 40544      |
| 40-49 years         | 23203                       | 58.4%           | 16550 | 41.6%           | 39753      |
| 50-59 years         | 29127                       | 55.9%           | 22943 | 44.1%           | 52070      |
| 60+ years           | 34109                       | 64.0%           | 19212 | 36.0%           | 53321      |
| <b>Provider sex</b> |                             |                 |       |                 |            |
| Female              | 52950                       | 54.2%           | 44655 | 45.8%           | 97605      |
| Male                | 61295                       | 61.5%           | 38409 | 38.5%           | 99704      |
| <b>Total</b>        | 114245                      | 57.9%           | 83064 | 42.1%           | 197309     |

525  
526  
527  
528

Figure 2: Adjusted odds ratios for calculable Framingham score using random-effects multilevel logistic regression model

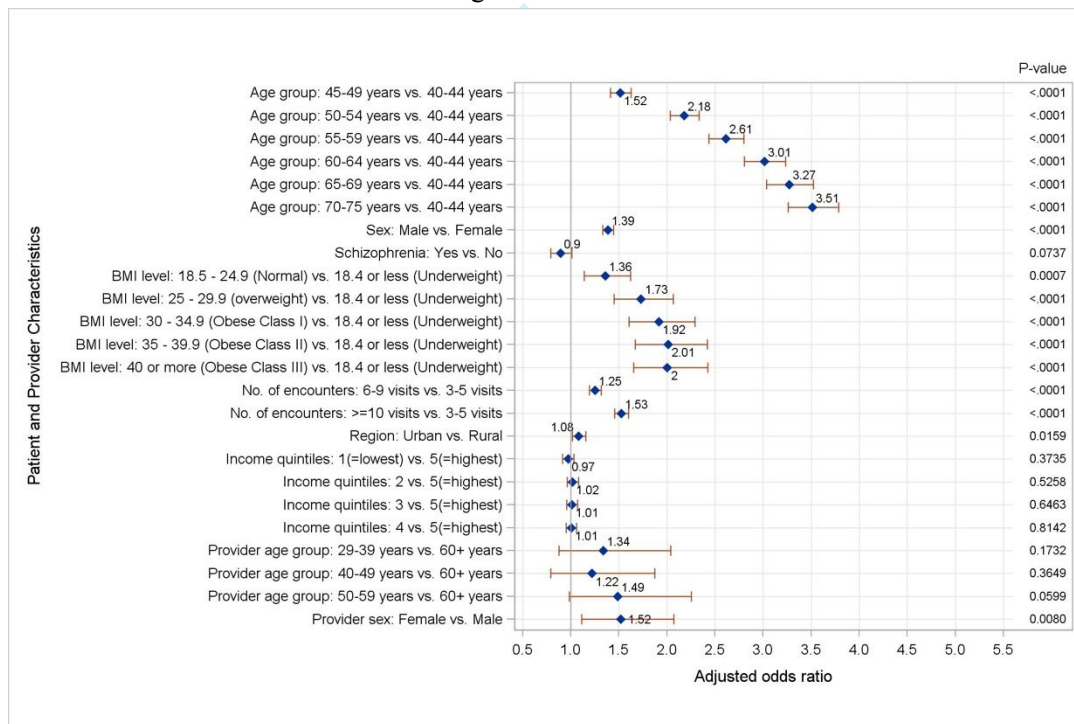

529  
530  
531  
532  
533  
534  
535

536 **Supplementary tables**

537 Table S1: Unadjusted odds ratios for calculable Framingham score using random-effects multilevel  
 538 logistic regression model

| Unadjusted odds ratio |                                 |                            |            |             |             |         |
|-----------------------|---------------------------------|----------------------------|------------|-------------|-------------|---------|
| Characteristics       | Index group                     | Reference group            | Odds Ratio | Lower limit | Upper limit | P-value |
| Age                   | 45-49 years                     | 40-44 years                | 1.49       | 1.434       | 1.547       | <.0001  |
| Age                   | 50-54 years                     | 40-44 years                | 2.24       | 2.162       | 2.329       | <.0001  |
| Age                   | 55-59 years                     | 40-44 years                | 2.78       | 2.681       | 2.887       | <.0001  |
| Age                   | 60-64 years                     | 40-44 years                | 3.50       | 3.371       | 3.640       | <.0001  |
| Age                   | 65-69 years                     | 40-44 years                | 4.44       | 4.266       | 4.626       | <.0001  |
| Age                   | 70-75 years                     | 40-44 years                | 5.05       | 4.850       | 5.262       | <.0001  |
| Sex                   | Male                            | Female                     | 1.07       | 1.048       | 1.092       | <.0001  |
| Schizophrenia         | Yes                             | No                         | 1.25       | 1.173       | 1.327       | <.0001  |
| BMI level             | 18.5 - 24.9<br>(Normal)         | 18.4 or less (Underweight) | 1.25       | 1.077       | 1.450       | 0.0034  |
| BMI level             | 25 - 29.9<br>(overweight)       | 18.4 or less (Underweight) | 1.77       | 1.522       | 2.047       | <.0001  |
| BMI level             | 30 - 34.9 (Obese<br>Class I)    | 18.4 or less (Underweight) | 2.03       | 1.749       | 2.361       | <.0001  |
| BMI level             | 35 - 39.9 (Obese<br>Class II)   | 18.4 or less (Underweight) | 2.09       | 1.784       | 2.437       | <.0001  |
| BMI level             | 40 or more<br>(Obese Class III) | 18.4 or less (Underweight) | 1.99       | 1.695       | 2.342       | <.0001  |
| No. of encounters     | 6-9 visits                      | 3-5 visits                 | 1.60       | 1.558       | 1.653       | <.0001  |
| No. of encounters     | >=10 visits                     | 3-5 visits                 | 2.39       | 2.320       | 2.455       | <.0001  |
| Region                | Urban                           | Rural                      | 1.06       | 1.026       | 1.105       | 0.0008  |
| Income quintiles      | 1(=lowest)                      | 5(=highest)                | 1.04       | 1.004       | 1.075       | 0.0285  |
| Income quintiles      | 2                               | 5(=highest)                | 1.05       | 1.020       | 1.089       | 0.0017  |
| Income quintiles      | 3                               | 5(=highest)                | 1.04       | 1.005       | 1.071       | 0.0217  |
| Income quintiles      | 4                               | 5(=highest)                | 1.00       | 0.974       | 1.034       | 0.8188  |
| Provider age          | 29-39 years                     | 60+ years                  | 1.69       | 1.225       | 2.334       | 0.0014  |
| Provider age          | 40-49 years                     | 60+ years                  | 1.36       | 0.972       | 1.914       | 0.0725  |
| Provider age          | 50-59 years                     | 60+ years                  | 1.38       | 0.986       | 1.944       | 0.0600  |
| Provider sex          | Female                          | Male                       | 1.61       | 1.296       | 2.012       | <.0001  |

539

540

541

542

543

544

545

546

547

548

549



550 Table S2: Adjusted odds ratios for calculable Framingham score using random-effects multilevel logistic  
 551 regression model

| Adjusted odds ratio |                              |                            |            |             |             |         |
|---------------------|------------------------------|----------------------------|------------|-------------|-------------|---------|
| Characteristics     | Index group                  | Reference group            | Odds Ratio | Lower limit | Upper limit | P-value |
| Age group           | 45-49 years                  | 40-44 years                | 1.52       | 1.41        | 1.63        | <.0001  |
| Age group           | 50-54 years                  | 40-44 years                | 2.18       | 2.03        | 2.33        | <.0001  |
| Age group           | 55-59 years                  | 40-44 years                | 2.61       | 2.44        | 2.80        | <.0001  |
| Age group           | 60-64 years                  | 40-44 years                | 3.01       | 2.81        | 3.24        | <.0001  |
| Age group           | 65-69 years                  | 40-44 years                | 3.27       | 3.04        | 3.52        | <.0001  |
| Age group           | 70-75 years                  | 40-44 years                | 3.51       | 3.26        | 3.78        | <.0001  |
| Sex                 | Male                         | Female                     | 1.39       | 1.33        | 1.45        | <.0001  |
| Schizophrenia       | Yes                          | No                         | 0.90       | 0.79        | 1.01        | 0.0737  |
| BMI level           | 18.5 - 24.9 (Normal)         | 18.4 or less (Underweight) | 1.36       | 1.14        | 1.62        | 0.0007  |
| BMI level           | 25 - 29.9 (overweight)       | 18.4 or less (Underweight) | 1.73       | 1.45        | 2.07        | <.0001  |
| BMI level           | 30 - 34.9 (Obese Class I)    | 18.4 or less (Underweight) | 1.92       | 1.60        | 2.29        | <.0001  |
| BMI level           | 35 - 39.9 (Obese Class II)   | 18.4 or less (Underweight) | 2.01       | 1.67        | 2.42        | <.0001  |
| BMI level           | 40 or more (Obese Class III) | 18.4 or less (Underweight) | 2.00       | 1.66        | 2.43        | <.0001  |
| No. of encounters   | 6-9 visits                   | 3-5 visits                 | 1.25       | 1.19        | 1.31        | <.0001  |
| No. of encounters   | >=10 visits                  | 3-5 visits                 | 1.53       | 1.46        | 1.60        | <.0001  |
| Region              | Urban                        | Rural                      | 1.08       | 1.02        | 1.16        | 0.0159  |
| Income quintiles    | 1(=lowest)                   | 5(=highest)                | 0.97       | 0.91        | 1.03        | 0.3735  |
| Income quintiles    | 2                            | 5(=highest)                | 1.02       | 0.96        | 1.08        | 0.5258  |
| Income quintiles    | 3                            | 5(=highest)                | 1.01       | 0.96        | 1.07        | 0.6463  |
| Income quintiles    | 4                            | 5(=highest)                | 1.01       | 0.96        | 1.06        | 0.8142  |
| Provider age group  | 29-39 years                  | 60+ years                  | 1.34       | 0.88        | 2.04        | 0.1732  |
| Provider age group  | 40-49 years                  | 60+ years                  | 1.22       | 0.79        | 1.88        | 0.3649  |
| Provider age group  | 50-59 years                  | 60+ years                  | 1.49       | 0.98        | 2.26        | 0.0599  |
| Provider sex        | Female                       | Male                       | 1.52       | 1.12        | 2.07        | 0.0080  |

552

STROBE Statement—Checklist of items that should be included in reports of *cohort studies***Cardiovascular disease risk in patients with schizophrenia: retrospective cohort study of risk factor documentation and management in primary care electronic medical records**

|                              | Item No | Recommendation                                                                                                                                                                                                                                                                                                         | Page No |
|------------------------------|---------|------------------------------------------------------------------------------------------------------------------------------------------------------------------------------------------------------------------------------------------------------------------------------------------------------------------------|---------|
| <b>Title and abstract</b>    | 1       | (a) Indicate the study's design with a commonly used term in the title or the abstract<br>(b) Provide in the abstract an informative and balanced summary of what was done and what was found                                                                                                                          | 1<br>2  |
| <b>Introduction</b>          |         |                                                                                                                                                                                                                                                                                                                        |         |
| Background/rationale         | 2       | Explain the scientific background and rationale for the investigation being reported                                                                                                                                                                                                                                   | 4       |
| Objectives                   | 3       | State specific objectives, including any prespecified hypotheses                                                                                                                                                                                                                                                       | 5       |
| <b>Methods</b>               |         |                                                                                                                                                                                                                                                                                                                        |         |
| Study design                 | 4       | Present key elements of study design early in the paper                                                                                                                                                                                                                                                                | 5       |
| Setting                      | 5       | Describe the setting, locations, and relevant dates, including periods of recruitment, exposure, follow-up, and data collection                                                                                                                                                                                        | 5       |
| Participants                 | 6       | (a) Give the eligibility criteria, and the sources and methods of selection of participants. Describe methods of follow-up<br>(b) For matched studies, give matching criteria and number of exposed and unexposed                                                                                                      | 6       |
| Variables                    | 7       | Clearly define all outcomes, exposures, predictors, potential confounders, and effect modifiers. Give diagnostic criteria, if applicable                                                                                                                                                                               | 6       |
| Data sources/<br>measurement | 8*      | For each variable of interest, give sources of data and details of methods of assessment (measurement). Describe comparability of assessment methods if there is more than one group                                                                                                                                   | 6       |
| Bias                         | 9       | Describe any efforts to address potential sources of bias                                                                                                                                                                                                                                                              | 7       |
| Study size                   | 10      | Explain how the study size was arrived at                                                                                                                                                                                                                                                                              | 7       |
| Quantitative variables       | 11      | Explain how quantitative variables were handled in the analyses. If applicable, describe which groupings were chosen and why                                                                                                                                                                                           | 7       |
| Statistical methods          | 12      | (a) Describe all statistical methods, including those used to control for confounding<br>(b) Describe any methods used to examine subgroups and interactions<br>(c) Explain how missing data were addressed<br>(d) If applicable, explain how loss to follow-up was addressed<br>(e) Describe any sensitivity analyses | 7       |
| <b>Results</b>               |         |                                                                                                                                                                                                                                                                                                                        |         |
| Participants                 | 13*     | (a) Report numbers of individuals at each stage of study—eg numbers potentially eligible, examined for eligibility, confirmed eligible, included in the study, completing follow-up, and analysed<br>(b) Give reasons for non-participation at each stage<br>(c) Consider use of a flow diagram                        | 7/8     |
| Descriptive data             | 14*     | (a) Give characteristics of study participants (eg demographic, clinical, social) and information on exposures and potential confounders<br>(b) Indicate number of participants with missing data for each variable of interest<br>(c) Summarise follow-up time (eg, average and total amount)                         | 8       |

1  
2  
3  
4  
5  
6  
7  
8  
9  
10  
11  
12  
13  
14  
15  
16  
17  
18  
19  
20  
21  
22  
23  
24  
25  
26  
27  
28  
29  
30  
31  
32  
33  
34  
35  
36  
37  
38  
39  
40  
41  
42  
43  
44  
45  
46  
47  
48  
49  
50  
51  
52  
53  
54  
55  
56  
57  
58  
59  
60

---

|              |     |                                                                |   |
|--------------|-----|----------------------------------------------------------------|---|
| Outcome data | 15* | Report numbers of outcome events or summary measures over time | 8 |
|--------------|-----|----------------------------------------------------------------|---|

---

For peer review only

|    |                          |    |                                                                                                                                                                                                              |    |
|----|--------------------------|----|--------------------------------------------------------------------------------------------------------------------------------------------------------------------------------------------------------------|----|
| 1  | Main results             | 16 | (a) Give unadjusted estimates and, if applicable, confounder-adjusted estimates and their precision (eg, 95% confidence interval). Make clear which confounders were adjusted for and why they were included | 8  |
| 2  |                          |    | (b) Report category boundaries when continuous variables were categorized                                                                                                                                    |    |
| 3  |                          |    | (c) If relevant, consider translating estimates of relative risk into absolute risk for a meaningful time period                                                                                             |    |
| 4  |                          |    |                                                                                                                                                                                                              |    |
| 5  |                          |    |                                                                                                                                                                                                              |    |
| 6  |                          |    |                                                                                                                                                                                                              |    |
| 7  |                          |    |                                                                                                                                                                                                              |    |
| 8  |                          |    |                                                                                                                                                                                                              |    |
| 9  | Other analyses           | 17 | Report other analyses done—eg analyses of subgroups and interactions, and sensitivity analyses                                                                                                               | 9  |
| 10 |                          |    |                                                                                                                                                                                                              |    |
| 11 | <b>Discussion</b>        |    |                                                                                                                                                                                                              |    |
| 12 |                          |    |                                                                                                                                                                                                              |    |
| 13 | Key results              | 18 | Summarise key results with reference to study objectives                                                                                                                                                     | 9  |
| 14 | Limitations              | 19 | Discuss limitations of the study, taking into account sources of potential bias or imprecision. Discuss both direction and magnitude of any potential bias                                                   | 10 |
| 15 |                          |    |                                                                                                                                                                                                              |    |
| 16 | Interpretation           | 20 | Give a cautious overall interpretation of results considering objectives, limitations, multiplicity of analyses, results from similar studies, and other relevant evidence                                   | 10 |
| 17 |                          |    |                                                                                                                                                                                                              |    |
| 18 |                          |    |                                                                                                                                                                                                              |    |
| 19 | Generalisability         | 21 | Discuss the generalisability (external validity) of the study results                                                                                                                                        | 10 |
| 20 |                          |    |                                                                                                                                                                                                              |    |
| 21 | <b>Other information</b> |    |                                                                                                                                                                                                              |    |
| 22 | Funding                  | 22 | Give the source of funding and the role of the funders for the present study and, if applicable, for the original study on which the present article is based                                                | 1  |
| 23 |                          |    |                                                                                                                                                                                                              |    |
| 24 |                          |    |                                                                                                                                                                                                              |    |

\*Give information separately for exposed and unexposed groups.

**Note:** An Explanation and Elaboration article discusses each checklist item and gives methodological background and published examples of transparent reporting. The STROBE checklist is best used in conjunction with this article (freely available on the Web sites of PLoS Medicine at <http://www.plosmedicine.org/>, Annals of Internal Medicine at <http://www.annals.org/>, and Epidemiology at <http://www.epidem.com/>). Information on the STROBE Initiative is available at <http://www.strobe-statement.org>.

# BMJ Open

## Cardiovascular risk factor documentation and management in primary care electronic medical records among people with schizophrenia: retrospective cohort study

|                                 |                                                                                                                                                                                                                                                                                                                                                                                                                                                                                                                                                                                                                                                    |
|---------------------------------|----------------------------------------------------------------------------------------------------------------------------------------------------------------------------------------------------------------------------------------------------------------------------------------------------------------------------------------------------------------------------------------------------------------------------------------------------------------------------------------------------------------------------------------------------------------------------------------------------------------------------------------------------|
| Journal:                        | <i>BMJ Open</i>                                                                                                                                                                                                                                                                                                                                                                                                                                                                                                                                                                                                                                    |
| Manuscript ID                   | bmjopen-2020-038013.R1                                                                                                                                                                                                                                                                                                                                                                                                                                                                                                                                                                                                                             |
| Article Type:                   | Original research                                                                                                                                                                                                                                                                                                                                                                                                                                                                                                                                                                                                                                  |
| Date Submitted by the Author:   | 08-Jun-2020                                                                                                                                                                                                                                                                                                                                                                                                                                                                                                                                                                                                                                        |
| Complete List of Authors:       | O'Neill, Braden; North York General Hospital, Family and Community Medicine; University of Toronto, Family and Community Medicine<br>Kalia, Sumeet; University of Toronto, Department of Family and Community Medicine<br>Aliarzadeh, Babak; University of Toronto, Department of Family and Community Medicine<br>Sullivan, Frank; University of St. Andrews, ; North York General hospital,<br><br>Moineddin, Rahim; University of Toronto, Family and Community Medicine<br>Kelly, Martina; University of Calgary Faculty of Medicine, DEPARTMENT OF FAMILY MEDICINE<br>Greiver, Michelle; University of Toronto, Family and Community Medicine |
| <b>Primary Subject Heading</b>: | General practice / Family practice                                                                                                                                                                                                                                                                                                                                                                                                                                                                                                                                                                                                                 |
| Secondary Subject Heading:      | Cardiovascular medicine, Health services research, Mental health                                                                                                                                                                                                                                                                                                                                                                                                                                                                                                                                                                                   |
| Keywords:                       | Health informatics < BIOTECHNOLOGY & BIOINFORMATICS, Cardiology < INTERNAL MEDICINE, MENTAL HEALTH, PRIMARY CARE, PREVENTIVE MEDICINE, Schizophrenia & psychotic disorders < PSYCHIATRY                                                                                                                                                                                                                                                                                                                                                                                                                                                            |
|                                 |                                                                                                                                                                                                                                                                                                                                                                                                                                                                                                                                                                                                                                                    |

SCHOLARONE™  
Manuscripts



I, the Submitting Author has the right to grant and does grant on behalf of all authors of the Work (as defined in the below author licence), an exclusive licence and/or a non-exclusive licence for contributions from authors who are: i) UK Crown employees; ii) where BMJ has agreed a CC-BY licence shall apply, and/or iii) in accordance with the terms applicable for US Federal Government officers or employees acting as part of their official duties; on a worldwide, perpetual, irrevocable, royalty-free basis to BMJ Publishing Group Ltd ("BMJ") its licensees and where the relevant Journal is co-owned by BMJ to the co-owners of the Journal, to publish the Work in this journal and any other BMJ products and to exploit all rights, as set out in our [licence](#).

The Submitting Author accepts and understands that any supply made under these terms is made by BMJ to the Submitting Author unless you are acting as an employee on behalf of your employer or a postgraduate student of an affiliated institution which is paying any applicable article publishing charge ("APC") for Open Access articles. Where the Submitting Author wishes to make the Work available on an Open Access basis (and intends to pay the relevant APC), the terms of reuse of such Open Access shall be governed by a Creative Commons licence – details of these licences and which [Creative Commons](#) licence will apply to this Work are set out in our licence referred to above.

Other than as permitted in any relevant BMJ Author's Self Archiving Policies, I confirm this Work has not been accepted for publication elsewhere, is not being considered for publication elsewhere and does not duplicate material already published. I confirm all authors consent to publication of this Work and authorise the granting of this licence.

1  
2  
3 1  
4  
5 2  
6  
7 3 **Cardiovascular risk factor documentation and management in primary care electronic**  
8 4 **medical records among people with schizophrenia: retrospective cohort study**  
9

10 5  
11  
12 6 Braden O'Neill<sup>1,2,3</sup>, Sumeet Kalia<sup>2</sup>, Babak Aliarzadeh<sup>2</sup>, Frank Sullivan<sup>1,4</sup>, Rahim Moineddin<sup>3</sup>,  
13 7 Martina Kelly<sup>5</sup>, Michelle Greiver<sup>1,2,3</sup>  
14

15 8  
16  
17 9 <sup>1</sup>Department of Family and Community Medicine, North York General Hospital, Toronto,  
18 10 Ontario, Canada

19  
20 11 <sup>2</sup>University of Toronto Practice-Based Research Network, Toronto, Ontario, Canada

21  
22 12 <sup>3</sup>Department of Family and Community Medicine, Faculty of Medicine, University of Toronto,  
23 13 Ontario, Canada

24  
25 14 <sup>4</sup>School of Medicine, University of St. Andrews, Fife, Scotland

26  
27 15 <sup>5</sup>Department of Family Medicine, University of Calgary, Alberta, Canada  
28  
29  
30 16

31 17 Corresponding author:

32 18 Braden O'Neill

33  
34 19 [braden.oneill@nygh.on.ca](mailto:braden.oneill@nygh.on.ca)  
35  
36  
37  
38 20

39 21 Funding: This study was funded by the Foundation for Advancing Family Medicine of the  
40 22 College of Family Physicians of Canada. Braden O'Neill completed this work during a Research  
41 23 Fellowship with the Medical Psychiatry Alliance, Toronto, Ontario.  
42  
43

44 24 Braden O'Neill and Michelle Greiver receive salary support from North York General Hospital  
45 25 and the Department of Family and Community Medicine, University of Toronto, Ontario,  
46 26 Canada.  
47

48 27 There was no patient and public involvement in the design or conduct of this study.  
49

50 28 Keywords: cardiovascular diseases; schizophrenia; primary health care; electronic health  
51 29 records; primary prevention  
52

53 30 Word count: 2384  
54  
55 31  
56  
57  
58  
59  
60

32

**Abstract**

**Objectives:** In order to address the substantial increased risk of cardiovascular disease among people with schizophrenia, it is necessary to identify the factors responsible for some of that increased risk. We analyzed the extent to which these risk factors were documented in primary care electronic medical records, and compared their documentation by patient and provider characteristics.

**Design:** Retrospective cohort study

**Setting:** Electronic medical record (EMR) database of the University of Toronto Practice Based Research Network (UTOPIAN) Data Safe Haven.

**Participants:** 197129 adults between 40-75 years of age; 4882 with schizophrenia and 192247 without.

**Primary and secondary outcome measures:** Documentation of cardiovascular disease risk factors (age, sex, smoking history, presence of diabetes, blood pressure, whether a patient is currently on medication to reduce blood pressure, total cholesterol, and high density lipoprotein cholesterol)

**Results:** Documentation of cardiovascular risk factors was more complete among people with schizophrenia (74.5% of whom had blood pressure documented at least once in the last two years versus 67.3% of those without,  $p > 0.0001$ ). Smoking status was not documented in 19.8% of those with schizophrenia and 20.8% of those without ( $p = 0.0843$ ). Factors associated with improved documentation included older patients (OR for age 70-75 vs 45-49 = 3.51, 95% CI 3.26-3.78), male patients (OR = 1.39, 95% CI 1.33-1.45), patients cared for by a female provider (OR = 1.52, 95% CI: 1.12-2.07), and increased number of encounters (OR for  $\geq 10$  visits vs 3-5 visits = 1.53, 95% CI 1.46-1.60).

**Conclusions:** Documentation of cardiovascular risk factors was better among people with schizophrenia than without, although overall documentation was inadequate. Efforts to improve documentation of risk factors are warranted in order to facilitate improved management.

59

60

61



1  
2  
3 62  
4  
5 63  
6  
7 64  
8 65  
9  
10 66  
11  
12 67  
13  
14 68  
15  
16 69  
17 70  
18  
19 71  
20  
21 72  
22  
23 73  
24 74  
25  
26 75  
27  
28 76  
29  
30 77  
31  
32 78  
33  
34 79  
35 80  
36  
37 81  
38  
39 82  
40  
41 83  
42 84  
43  
44 85  
45  
46 86  
47  
48 87  
49  
50 88  
51  
52 89  
53  
54 90  
55  
56 91  
57  
58  
59  
60

### Article summary:

- This study analyzes data from the University of Toronto Practice-Based Research Network (UTOPIAN) Data Safe Haven, one of the world's largest primary care electronic medical record (EMR) databases
- It uses de-identified data from primary care charts to identify cardiovascular disease risk factors
- Strengths of the study include the sample size and the breadth of data included, from approximately 400 primary care clinics in Ontario, Canada
- Weaknesses include possible missing data resulting from the process of transferring data from primary care charts into a de-identified database, and the fact that the clinics included in the database are mainly urban and suburban academic clinics; these results may not necessarily be generalizable to all primary care settings

1  
2  
3 924  
5 936  
7 94 **Introduction**8  
9 9510 96 High quality, comprehensive data are needed to understand health and how to improve it. Risk  
11 97 factors must be known and documented so that interventions can be planned and implemented.12  
13  
14 98 One of the key challenges in primary care research has been the availability and quality of data.

15 99 When Julian Tudor Hart conducted research on patients accessing care in his practice in Wales in

16 100 the 1970s, it required laboriously searching through individual paper charts to collect necessary

17 101 data.(1) Today, electronic medical records are widely used and can facilitate instant searches at

18 102 the practice level as well as at local and national levels through databases that aggregate data

19 103 from multiple practices. However, several studies have demonstrated that important data – for

20 104 example, regarding cardiovascular risk factors such as smoking and whether someone has a

21 105 diagnosis of hypertension – remain incomplete.(2,3)

22  
23  
24 106 People with serious mental illnesses, particularly those with schizophrenia, die 8 to 10 years

25 107 earlier than those without these conditions.(4,5) This is primarily due to higher rates of

26 108 cardiovascular disease.(5-7) While the long-term metabolic effects of antipsychotic medications

27 109 used to treat schizophrenia are unclear, their use is associated with increased weight and blood

28 110 glucose.(8,9) Patients may also face challenges with self-care or accessing appropriate medical

29 111 care.(10) To date there is sparse evidence about how to improve physical health status in these

30 112 patients; a recent review of ‘collaborative care’ where both physical and mental health are

31 113 attended to for these patients did not find any evidence of reductions in cardiovascular disease

32 114 risk.(11)

33  
34  
35 115 The primary prevention of cardiovascular disease includes addressing risk factors such as

36 116 tobacco use and hypertension; these are commonly managed in primary care. This is particularly

37 117 true for people with serious mental illness, who are seen more frequently by family physicians

38 118 than by psychiatrists.(12) The prevalence of schizophrenia in the general adult population is 1-

39 119 3%, making it a relatively common condition.(13,14) The prevalence and frequency of

40 120 interaction strongly supports the important role played by family medicine in reducing the risk of

1  
2  
3 121 cardiovascular disease for people with mental illness. To do this effectively it is necessary to  
4  
5 122 understand what that risk is and what variables should be focused on.  
6

7 123 As a first step in establishing patients' physical health status and identifying who to target for  
8  
9 124 interventions to improve health, it is necessary to understand their health status. Whether data  
10  
11 125 completeness concerns regarding cardiovascular disease risk are general to all patients or  
12  
13 126 whether they are more pronounced amongst those with serious mental illness is unknown.  
14

15 127 Our study objectives were: to describe documentation of cardiovascular disease risk factors  
16  
17 128 (HDL, LDL, total cholesterol; blood pressure; smoking status) among patients with and without  
18  
19 129 schizophrenia; and to explore patient and provider characteristics associated with sufficient  
20  
21 130 documentation of these risk factors to calculate the Framingham risk score for patients with  
22  
23 131 schizophrenia.  
24

25 132

## 26 133 **Methods**

27 134

28  
29  
30 135 This is an observational retrospective cohort study design. We applied the STrengthening the  
31  
32 136 Reporting of OBServational studies in Epidemiology checklist for reporting observational  
33  
34 137 studies.(15) Ethics approval was obtained from the North York General Hospital Research Ethics  
35  
36 138 Board, approval #18-0006.  
37

38 139

### 39 140 *Setting and data sources*

40 141

41  
42 142 We used data from the University of Toronto Practice-Based Research Network (UTOPIAN)  
43  
44 143 Data Safe Haven, a primary care electronic medical record (EMR) database; data extracted as of  
45  
46 144 April 1 2018 were used for this project.(16) The UTOPIAN Data Safe Haven contains EMR  
47  
48 145 records from over 550 000 patients who access care in primary care practices in the Greater  
49  
50 146 Toronto Area in Ontario, Canada. Physicians have consented to the provision of de-identified  
51  
52 147 data, housed in a secure environment. These data are used for quality improvement and research  
53  
54 148 purposes. The UTOPIAN database includes validated definitions for eight long-term conditions:  
55  
56 149 osteoarthritis, diabetes, epilepsy, parkinsonism, dementia, hypertension, COPD,  
57  
58  
59  
60

1  
2  
3 150 depression.(17,18) Neighbourhood level income quintiles are also available from patient  
4  
5 151 residential postal codes using Statistics Canada's Postal Code Conversion Files.(19,20)  
6  
7  
8 152  
9 153

10  
11 154 *Study population*  
12  
13 155

14 156 We included patients 40-75 years of age because Canadian guidelines recommend regular  
15  
16 157 screening for cardiovascular disease (CVD) risk in this age range. There is no clear consensus on  
17  
18 158 the recommended interval for screening, which varies between yearly to every 5 years.(21-23)  
19  
20 159 Guidelines suggest yearly CVD risk assessment for patients with schizophrenia (24); however  
21  
22 160 these are not routinely followed in primary care practice and this increased frequency is  
23  
24 161 consensus-based and not necessarily supported by strong evidence. We therefore chose to look at  
25  
26 162 a two year interval in which screening could have taken place, recognizing that there may be  
27  
28 163 some patients for whom it may be appropriate to screen less often. The most commonly used  
29  
30 164 CVD risk assessment tool in Canadian primary care practice is the Framingham risk calculator  
31  
32 165 (25), which includes the following items: (i) age, (ii) sex, (iii) smoking history, (iv) presence of  
33  
34 166 diabetes, (v) systolic blood pressure (SBP), (vi) whether a patient is currently on medication to  
35  
36 167 reduce blood pressure, (vii) total cholesterol, and (viii) high density lipoprotein (HDL)  
37  
38 168 cholesterol. This is a validated risk stratification tool that establishes a patient's risk of  
39  
40 169 developing cardiovascular disease (CVD; including: coronary death, myocardial infarction,  
41  
42 170 coronary insufficiency, angina, ischemic stroke, hemorrhagic stroke, transient ischemic attack,  
43  
44 171 peripheral artery disease, heart failure) within the next 10 years. It is valid for patients 30 – 74  
45  
46 172 years of age.(25)  
47  
48 173

49 174 We identified patients that were 40-75 years of age as of March 31, 2018. We limited our cohort  
50  
51 175 definition to those that had at least 3 primary care visits in the 2 year period between April 1,  
52  
53 176 2016 and March 31, 2018. To identify outcomes we looked at whether people had CVD risk  
54  
55 177 factors as outlined above documented at least once in the above period. This definition ensured  
56  
57 178 that we included patients likely to be routinely followed by the providers whose records are  
58  
59 179 included in the database, and is consistent with our usual approach for studies using this  
60  
180 database. We identified patients with schizophrenia using the same definition used in a previous

1  
2  
3 181 study using the same database, using a combination of encounter diagnoses used for billing  
4  
5 182 purposes as well as documentation of the condition in the electronic medical record.(26)

6 183

7 184

8  
9  
10 185 *Statistical analysis*

11 186

12  
13 187 We compared the documentation of cardiovascular disease (CVD) risk factors included in the  
14  
15 188 Framingham risk calculator between those with and without schizophrenia using a chi-square  
16  
17 189 test. P-values derived from multiple hypothesis tests were adjusted using false discovery rates. In  
18  
19 190 particular, the CVD risk factors included: HDL cholesterol, SBP, total cholesterol measured in  
20  
21 191 the last two years of study follow-up, and whether smoking status had ever been recorded. The  
22  
23 192 relationship between the complete documentation of all Framingham elements was also assessed  
24  
25 193 with respect to patient characteristics (age, sex, number of encounters in two years of study  
26  
27 194 follow-up, diagnosis of schizophrenia, most recent body mass index in the last two years of study  
28  
29 195 follow-up), provider characteristics (age, sex) and geographical characteristics (income quintiles,  
30  
31 196 rurality). A mixed-effects multilevel logistic regression was used to estimate unadjusted and  
32  
33 197 adjusted odds ratios for the complete documentation of all Framingham elements (i.e. calculable  
34  
35 198 Framingham score). Providers were specified as a random effect in the regression model.

36 199

37 200 All statistical analyses were generated using SAS software, version 9.4 M4 (SAS Institute). A  
38 201 fixed nominal level of 0.05 was used to determine statistical significance in this study.

39 202

## 40 203 **Results**

41 204 *Cohort generation*

42 205

43  
44 206 Data from 376 physicians practicing in 96 different clinic sites were included. In total, 197,309  
45  
46 207 patients were identified with age between 40-75 years old (as of March 31, 2018), recorded sex  
47  
48 208 and had at least 3 visits in the two years of interest (Figure 1). Out of 197,309 patients, 83,064  
49  
50 209 patients (40.4%) had adequate data to calculate a Framingham risk score using the most recent  
51  
52 210 data available for HDL, SBP, and total cholesterol in the last 2 years and smoking status ever  
53  
54  
55  
56  
57  
58  
59  
60

1  
2  
3 211 recorded. Of these, 4880 patients met the definition of schizophrenia and 2130 (43.8%) of these  
4 212 patients with schizophrenia had complete documentation to calculate the Framingham risk score.

5 213

6  
7  
8 214 FIGURE 1 HERE

9 215

10 216 *Individual Framingham Data Elements*

11 217

12 218 We compared the presence of individual Framingham elements between 4882 patients with  
13 219 schizophrenia and 192247 patients without, over a two year look back window (April 1, 2016 –  
14 220 March 31, 2018) (Table 1). Framingham elements were documented more completely among  
15 221 those with schizophrenia: 25.5% of those with schizophrenia and 32.7% of those without had no  
16 222 documented blood pressure readings over the last two years ( $p < 0.0001$ ). 39.2% of those with  
17 223 schizophrenia and 42.1% of those without did not have any cholesterol readings ( $p < 0.0001$ ).  
18 224 There was no difference in documentation of smoking status between the two groups ( $p = 0.084$ ),  
19 225 with documentation missing in approximately 20% of all charts.

20 226

21 227 TABLE 1 HERE

22 228

23 229 *Patient, provider and geographical characteristics as predictors of calculable Framingham*  
24 230 *score*

25 231

26 232 Individual patient characteristics between those who had complete documentation of  
27 233 Framingham score factors and those who did not are in Table 2 and Table 3. Unadjusted and  
28 234 adjusted odds ratios for the complete documentation of Framingham score are in supplementary  
29 235 Table S1 and Table S2.

30 236

31 237 Patients with schizophrenia did not have statistically significant decreased adjusted odds for the  
32 238 complete documentation of Framingham score as compared to patients without schizophrenia,  
33 239 (OR = 0.90, 95% CI 0.79 – 1.01,  $p$ -value=0.10) (Figure 2). The adjusted odds for the complete  
34 240 documentation of Framingham factors increased with respect to the patient's age (70-75 years vs  
35 241 40-44 years OR = 3.51, 95% CI 3.26 – 3.78). Male patients had increased adjusted odds of

1  
2  
3 242 calculable Framingham score as compared to female patients (male vs. female OR = 1.39, 95%  
4 243 CI 1.33 – 1.45). An increase in the BMI level was associated with an increase in adjusted odds  
5 244 for calculable Framingham score (Obese class III vs. Underweight, OR = 2.00, 95% CI 1.66 –  
6 245 2.43) (Table 3). An increase in the total number of encounters also led to increased adjusted odds  
7 246 for the complete documentation of Framingham factors (more than 10 visits vs. 3-5 visits in last  
8 247 two years OR = 1.53, 95% CI 1.46 – 1.60).  
9  
10  
11  
12  
13  
14

15 248  
16 249 TABLE 2 HERE

17 250 Patients residing in urban regions had higher adjusted odds for the complete documentation of  
18 251 Framingham factors as compared to patients residing in rural regions (OR=1.08, 95% CI: 1.02 –  
19 252 1.16). However, no significant differences in adjusted odds ratios were detected across the five  
20 253 levels of income quintiles (1 vs 5, OR=0.97, 95% CI: 0.91-1.03, p-value=0.43). Female  
21 254 physicians had increased adjusted odds for the complete documentation of Framingham factors  
22 255 as compared to male physicians (OR=1.52, 95% CI: 1.12 – 2.07). However, provider age did not  
23 256 contribute to increased or decreased adjusted odds for calculable Framingham score (29-39 years  
24 257 vs. 60+ years, OR=1.49, 95% CI: 0.98 – 2.26, p-value=0.08).  
25  
26  
27  
28  
29  
30

31 258  
32 259 TABLE 3 HERE  
33  
34  
35  
36

## 37 260 38 261 **Discussion** 39 262

40  
41 263 In this study of primary care electronic medical records from the University of Toronto Practice-  
42 264 Based Research Network, we found better documentation of cardiovascular risk factors among  
43 265 people with schizophrenia as opposed to those without the condition. However, overall  
44 266 documentation was inadequate.  
45  
46  
47  
48

49 267 Other studies on preventive health for people with schizophrenia, such as those addressing  
50 268 cancer screening, have found lower rates of preventive care when compared with the general  
51 269 population.(27) We actually found more complete documentation of some risk factors among  
52 270 people with schizophrenia when compared to those without, such as blood pressure. There are  
53 271 various recommendations for frequency of cardiovascular disease risk screening in the general  
54  
55  
56  
57  
58  
59  
60

1  
2  
3 272 population; Allan et al suggested every 5 years for men over 40 and women over 50.(23) More  
4  
5 273 complete documentation of risk factors would be expected based on guidelines suggesting more  
6  
7 274 frequent cardiovascular disease risk assessment among people who are on antipsychotic  
8  
9 275 medication.(14) To some extent the present study demonstrates a promising finding, suggesting  
10  
11 276 that patients with schizophrenia are receiving at least as good care from this perspective as those  
12  
13 277 without the condition. It is, however, quite concerning that there are substantial gaps in  
14  
15 278 documentation of particular risk factors such as smoking cessation. Nearly 20% of patients did  
16  
17 279 not have smoking status documented in the chart. We suggest that if it is not documented, then it  
18  
19 280 is extremely unlikely that smoking cessation has been addressed at a primary care visit. Smoking  
20  
21 281 is highly prevalent among people with schizophrenia; Canadian estimates range from 47% (28)  
22  
23 282 and 78% (29). There are many effective interventions to support patients with schizophrenia to  
24  
25 283 stop smoking.(30) It is therefore essential to document smoking status for all patients with  
26  
27 284 schizophrenia and to make smoking cessation a priority.

26 285 We found several factors associated with what we assessed to be ‘appropriate’ documentation of  
27  
28 286 risk factors sufficient for cardiovascular risk assessment.

29  
30  
31 287 Limitations of this study include the use of EMR data, which is known to have deficiencies  
32  
33 288 around data quality and completeness.(31, 32) UTOPIAN, as part of the Canadian Primary Care  
34  
35 289 Sentinel Surveillance Network, is disproportionately comprised of more providers in academic  
36  
37 290 practices and has an older population than the Canadian average.(33) These findings therefore  
38  
39 291 may not be generalizable to all Canadian primary care settings. UTOPIAN contains data from  
40  
41 292 multiple EMR vendors and as a consequence there is the possibility that some data may be  
42  
43 293 missing as a result of errors in database formation; these data are extracted with the best  
44  
45 294 available approaches and regular data cleaning attempts to minimize these errors. Other studies  
46  
47 295 have found some deficiencies, particularly related to documentation of health conditions, in  
48  
49 296 EMR data in the Canadian setting.(3) There are no Canadian national standards for necessary  
50  
51 297 elements of EMR documentation in primary care. In Ontario, laboratory results enter most  
52  
53 298 physicians’ EMRs through the Ontario Laboratory Information System (34) which is an  
54  
55 299 automatic process, reducing the extent to which documentation is incomplete because of  
56  
57 300 provider error. Our focus on ‘documentation’ in this study is as a result of the practical principle  
58  
59 301 that if something is not documented, it cannot be acted on; therefore data documentation and  
60



1  
2  
3 302 completeness are being taken as a proxy for their consideration in clinical decision-making. It is  
4  
5 303 not possible from the data considered in this study to ascertain whether a provider has attempted  
6  
7 304 to intervene towards smoking cessation, or whether someone has addressed blood pressure  
8  
9 305 management. There are other available risk stratification approaches available both for the  
10  
11 306 general population [such as QRISK2 (35)] and specifically for people with serious mental illness  
12  
13 307 [PRIMROSE (36)]. We chose to focus on the Framingham assessment because it is the most  
14  
15 308 commonly used in Canadian primary care and therefore would be most relevant to the study  
16  
17 309 context.

18 310 In summary, we found slightly more complete documentation of cardiovascular risk factors and  
19  
20 311 their management among people with schizophrenia as opposed to those without this condition.  
21  
22 312 However, overall documentation of these risk factors remains incomplete. Adequate  
23  
24 313 cardiovascular disease risk assessment is essential to identifying and addressing risk factors,  
25  
26 314 particularly among people with schizophrenia who have much higher mortality from  
27  
28 315 cardiovascular disease (and other conditions) than the general public. Efforts should be  
29  
30 316 undertaken in primary care to improve data completeness and CVD risk assessment and  
31  
32 317 management.

33 318

35 319 **Conflicts of interest:** All authors report that they have no conflicts of interest to declare.

37 320 **Data statement:** Data from this study are held by the University of Toronto Practice-Based  
38  
39 321 Research Network; ethics approval for this study does not allow unrestricted public access to the  
40  
41 322 data. Please contact the corresponding author for information on how to access.

43 323 **Author statement:** BO, SK, BA, FS, RM, MK, MG contributed to the initial conception of the  
44  
45 324 study. BO, SK, BA, RM made substantial contributions to the statistical methodology, analysis  
46  
47 325 and data interpretation. BO and SK wrote the first draft of the manuscript. BO, SK, BA, FS, MK,  
48  
49 326 MG provided substantial revisions to the manuscript.

51 327

53 328

55 329

330

331

332

333

334

335

336

**References**

337

1. Hart JT. The inverse care law. *Lancet*. 1971 Feb 27;297(7696):405-12.

338

339

2. Greiver M, Aliarzadeh B, Meaney C, Moineddin R, Southgate CA, Barber DT, White DG, Martin KB, Ikhtiar T, Williamson T. Are we asking patients if they smoke? Missing information on tobacco use in Canadian electronic medical records. *Am J Prevent Med*. 2015 Aug 31;49(2):264-8.

343

344

3. Singer A, Yakubovich S, Kroeker AL, Dufault B, Duarte R, Katz A. Data quality of electronic medical records in Manitoba: do problem lists accurately reflect chronic disease billing diagnoses? *J Am Med Inform Assoc*. 2016 Apr 23;23(6):1107-12.

345

346

347

348

4. Walker ER, McGee RE, Druss BG. Mortality in mental disorders and global disease burden implications: a systematic review and meta-analysis. *JAMA Psych*. 2015 Apr 1;72(4):334-41.

349

350

351

352

5. Gatov E, Rosella L, Chiu M, Kurdyak P. Trends in standardized mortality among individuals with schizophrenia, 1993–2012: a population-based, repeated cross-sectional study. *CMAJ* 2017;189:e1177-87.

353

354

355

356

6. Hennekens CH, Hennekens AR, Hollar D, Casey DE. Schizophrenia and increased risks of cardiovascular disease. *Am Heart J*. 2005 Dec 31;150(6):1115-21.

357

358

359

7. Goldstein BI, Fagiolini A, Houck P, Kupfer DJ. Cardiovascular disease and hypertension among adults with bipolar I disorder in the United States. *Bipolar Disor*. 2009 Sep 1;11(6):657-62.

360

361

362

363

8. Hirsch L, Yang J, Bresee L, Jette N, Patten S, Pringsheim T. Second-generation antipsychotics and metabolic side effects: a systematic review of population-based studies. *Drug safety*. 2017 Sep 1;40(9):771-81.

364

365

366

367

368

- 1  
2  
3 366  
4  
5 367  
6 368  
7 369  
8 370  
9 371  
10 372  
11 373  
12 374  
13 375  
14 376  
15 377  
16 378  
17 379  
18 380  
19 381  
20 382  
21 383  
22 384  
23 385  
24 386  
25 387  
26 388  
27 389  
28 390  
29 391  
30 392  
31 393  
32 394  
33 395  
34 396  
35 397  
36 398  
37 399  
38 400  
39 401  
40 402  
41 403  
42 404  
43 405
9. Spertus J, Horvitz-Lennon M, Abing H, Normand SL. Risk of weight gain for specific antipsychotic drugs: a meta-analysis. *NPJ schizophrenia*. 2018 Jun 27;4(1):1-7.
  10. De Hert M, Dekker JM, Wood D, Kahl KG, Holt RI, Möller HJ. Cardiovascular disease and diabetes in people with severe mental illness position statement from the European Psychiatric Association (EPA), supported by the European Association for the Study of Diabetes (EASD) and the European Society of Cardiology (ESC). *European Psych*. 2009 Sep 1;24(6):412-24.
  11. Bullock HL, Waddell K, & Wilson MG. Rapid synthesis: Identifying and assessing core components of collaborative-care models for treating mental and physical health conditions. Hamilton, Canada: McMaster Health Forum, 31 March 2017.
  12. Slomp M, Bland R, Patterson S, Whittaker L. Three-year physician treated prevalence rate of mental disorders in Alberta. *Can J Psych*. 2009 Mar;54(3):199-203.
  13. Government of Canada [Internet]: Ottawa, ON. Chapter 3: Schizophrenia – A report on mental illnesses in Canada. 2012. [cited 31 January 2018] Available from: <https://www.canada.ca/en/public-health/services/reports-publications/report-on-mental-illnesses-canada/schizophrenia.htm>
  14. Saha S, Chant D, Welham J, McGrath J. A systematic review of the prevalence of schizophrenia. *PLoS medicine*. 2005 May 31;2(5):e141.
  15. von Elm E , Altman DG , Egger M , et al. The Strengthening the Reporting of Observational Studies in Epidemiology (STROBE) Statement: guidelines for reporting observational studies. *Int J Surg* 2014;12:1495–9.doi:10.1016/j.ijsu.2014.07.013
  16. University of Toronto Department of Family and Community Medicine [Internet]. University of Toronto Practice Based Research Network (UTOPIAN). [cited 31 January 2018] Available from: <https://www.dfc.utoronto.ca/landing-page/utopian>
  17. CPCSSN Team, Case Definitions: Canadian Primary Care Sentinel Surveillance Network (CPCSSN), Version 2. July 16, 2019. URL: <http://cpcssn.ca/research-resources/cpcssn-case-definitions-v2>
  18. Williamson T, Green ME, Birtwhistle R, Khan S, Garies S, Wong ST, Natarajan N, Manca D, Drummond N. Validating the 8 CPCSSN case definitions for chronic disease

- 1  
2  
3 406 surveillance in a primary care database of electronic health records. *Ann Fam Med*. 2014  
4 407 Jul 1;12(4):367-72.  
5  
6 408
- 7 409 19. Wilkins R. Use of postal codes and addresses in the analysis of health data. *Health*  
8 410 *Reports*. 1993;5(2):157–77. pmid:8292756  
9 411
- 10 412 20. Pampalon R, Hamel D, Gamache P, Raymond G. A deprivation index for health planning  
11 413 in Canada. *Chronic Dis Can*. 2009 Jan 1;29(4):178–91. pmid:1980468  
12 414  
13 415
- 14 416 21. Genest J, McPherson R, Frohlich J, Anderson T, Campbell N, Carpentier A, Couture P,  
15 417 Dufour R, Fodor G, Francis GA, Grover S. 2009 Canadian Cardiovascular  
16 418 Society/Canadian guidelines for the diagnosis and treatment of dyslipidemia and  
17 419 prevention of cardiovascular disease in the adult–2009 recommendations. *Canadian*  
18 420 *Journal of Cardiology*. 2009 Oct 1;25(10):567-79.  
19 421
- 20 422 22. Anderson TJ, Grégoire J, Hegele RA, Couture P, Mancini GJ, McPherson R, Francis GA,  
21 423 Poirier P, Lau DC, Grover S, Genest Jr J. 2012 update of the Canadian Cardiovascular  
22 424 Society guidelines for the diagnosis and treatment of dyslipidemia for the prevention of  
23 425 cardiovascular disease in the adult. *Canadian Journal of Cardiology*. 2013 Feb  
24 426 1;29(2):151-67.  
25 427
- 26 428 23. Allan GM, Lindblad AJ, Comeau A, Coppola J, Hudson B, Mannarino M, McMinis C,  
27 429 Padwal R, Schelstraete C, Zarnke K, Garrison S. Simplified lipid guidelines: Prevention  
28 430 and management of cardiovascular disease in primary care. *Canadian Family Physician*.  
29 431 2015 Oct 1;61(10):857-67.  
30 432
- 31 433 24. Pringsheim T, Kelly M, Urness D, Teehan M, Ismail Z, Gardner D. Physical Health and  
32 434 Drug Safety in individuals with schizophrenia. *Can J Psych*. 2017 Sep;62(9):673-83.  
33 435
- 34 436 25. D’Agostino RB, Vasan RS, Pencina MJ, Wolf PA, Cobain M, Massaro JM, Kannel WB.  
35 437 General cardiovascular risk profile for use in primary care. *Circulation*. 2008 Feb  
36 438 12;117(6):743-53.  
37 439
- 38 440 26. O’Neill B, Kalia S, Aliarzadeh B, Moineddin R, Fung WL, Sullivan F, Maloul A,  
39 441 Bernard S, Greiver M. Agreement between primary care and hospital diagnosis of  
40 442 schizophrenia and bipolar disorder: A cross-sectional, observational study using record  
41 443 linkage. *PLOS One*. 2019 Jan 7;14(1):e0210214.  
42  
43  
44  
45  
46  
47  
48  
49  
50  
51  
52  
53  
54  
55  
56  
57  
58  
59  
60

- 1  
2  
3 444 27. Martens PJ, Chochinov HM, Prior HJ, Fransoo R, Burland E, Team TN. Are cervical  
4 445 cancer screening rates different for women with schizophrenia? A Manitoba population-  
5 446 based study. *Schizophrenia research*. 2009 Aug 1;113(1):101-6.  
6 447  
7  
8 448 28. Johnson JL, Ratner PA, Malchy LA, Okoli CT, Procyshyn RM, Bottorff JL, Groening M,  
9 449 Schultz A, Osborne M. Gender-specific profiles of tobacco use among non-  
10 450 institutionalized people with serious mental illness. *BMC psychiatry*. 2010  
11 451 Dec;10(1):101.  
12 452  
13  
14 453 29. Gerber, G.J., Krupa, T., Eastabrook, S., Gargaro, J., 2003. Substance use among persons  
15 454 with serious mental illness in eastern Ontario. *Can J Community Ment Health* 22, 113 –  
16 455 128.  
17 456  
18  
19 457 30. Tsoi DT, Porwal M, Webster AC. Interventions for smoking cessation and reduction in  
20 458 individuals with schizophrenia. *Cochrane Database Sys Rev*. 2013(2).  
21 459  
22  
23 460 31. Weiskopf NG, Weng C. Methods and dimensions of electronic health record data quality  
24 461 assessment: enabling reuse for clinical research. *J Am Inform Assoc*. 2013 Jan  
25 462 1;20(1):144-51.  
26 463  
27  
28 464 32. Birtwhistle R, Williamson T. Primary care electronic medical records: a new data source  
29 465 for research in Canada. *CMAJ*. 2015 Mar 3;187(4):239-40.  
30 466  
31  
32 467 33. Queenan JA, Williamson T, Khan S, Drummond N, Garies S, Morkem R, Birtwhistle R.  
33 468 Representativeness of patients and providers in the Canadian Primary Care Sentinel  
34 469 Surveillance Network: a cross-sectional study. *CMAJ Open*. 2016 Jan;4(1):E28.  
35 470  
36  
37 471 34. Ontario Laboratory Information System. eHealth Ontario.  
38 472 [https://www.ehealthontario.on.ca/en/for-healthcare-professionals/ontario-laboratories-](https://www.ehealthontario.on.ca/en/for-healthcare-professionals/ontario-laboratories-information-system-olis)  
39 473 [information-system-olis](https://www.ehealthontario.on.ca/en/for-healthcare-professionals/ontario-laboratories-information-system-olis)  
40 474  
41  
42 475 35. Hippisley-Cox J, Coupland C, Vinogradova Y, Robson J, Brindle P. Performance of the  
43 476 QRISK cardiovascular risk prediction algorithm in an independent UK sample of patients  
44 477 from general practice: a validation study. *Heart*. 2008 Jan 1;94(1):34-9.  
45 478  
46  
47 479 36. Zomer E, Osborn D, Nazareth I, Blackburn R, Burton A, Hardoon S, Holt RI, King M,  
48 480 Marston L, Morris S, Omar R. Effectiveness and cost-effectiveness of a cardiovascular  
49 481 risk prediction algorithm for people with severe mental illness (PRIMROSE). *BMJ open*.  
50 482 2017 Sep 1;7(9):e018181.  
51 483  
52 484  
53 485  
54  
55  
56  
57  
58  
59  
60

1  
2  
3 486  
4 487  
5 488  
6 489  
7 490  
8 491  
9 492  
10 493  
11 494  
12 495  
13 496

## Tables

Table 1. Distribution of Framingham factors among patients with and without schizophrenia

|                                       | Schizophrenia |                    |      |                    | P-values* |
|---------------------------------------|---------------|--------------------|------|--------------------|-----------|
|                                       | No            |                    | Yes  |                    |           |
|                                       | N             | Column Percent (%) | N    | Column Percent (%) |           |
| <b>Age range (years)</b>              |               |                    |      |                    | -         |
| 40-44 years                           | 28574         | 14.8%              | 700  | 14.3%              |           |
| 45-49 years                           | 29137         | 15.1%              | 753  | 15.4%              |           |
| 50-54 years                           | 30939         | 16.1%              | 784  | 16.1%              |           |
| 55-59 years                           | 31790         | 16.5%              | 832  | 17.0%              |           |
| 60-64 years                           | 27061         | 14.1%              | 707  | 14.5%              |           |
| 65-69 years                           | 22430         | 11.7%              | 588  | 12.0%              |           |
| 70-75 years                           | 22496         | 11.7%              | 518  | 10.6%              |           |
| <b>Sex (M/F)</b>                      |               |                    |      |                    | -         |
| Female                                | 106841        | 55.5%              | 2539 | 52.0%              |           |
| Male                                  | 85586         | 44.5%              | 2343 | 48.0%              |           |
| <b>HDL level (mmol/L)</b>             |               |                    |      |                    | <0.0001   |
| Missing                               | 79437         | 41.3%              | 1842 | 37.7%              |           |
| 0-0.89 mmol/L                         | 8565          | 4.5%               | 375  | 7.7%               |           |
| 0.9-1.19 mmol/L                       | 27925         | 14.5%              | 866  | 17.7%              |           |
| 1.2-1.29 mmol/L                       | 11006         | 5.7%               | 272  | 5.6%               |           |
| 1.3-1.59 mmol/L                       | 28313         | 14.7%              | 703  | 14.4%              |           |
| 1.60+ mmol/L                          | 37181         | 19.3%              | 824  | 16.9%              |           |
| <b>Total cholesterol (mmol/L)</b>     |               |                    |      |                    | <0.0001   |
| Missing                               | 81073         | 42.1%              | 1916 | 39.2%              |           |
| 0-4.09 mmol/L                         | 25388         | 13.2%              | 865  | 17.7%              |           |
| 4.1-5.19 mmol/L                       | 39801         | 20.7%              | 1068 | 21.9%              |           |
| 5.2-6.19 mmol/L                       | 30009         | 15.6%              | 663  | 13.6%              |           |
| 6.2-7.19 mmol/L                       | 11225         | 5.8%               | 252  | 5.2%               |           |
| 7.2+ mmol/L                           | 4931          | 2.6%               | 118  | 2.4%               |           |
| <b>Systolic blood pressure (mmHg)</b> |               |                    |      |                    | <0.0001   |
| Missing                               | 62934         | 32.7%              | 1245 | 25.5%              |           |
| 120 mmHg or less                      | 42293         | 22.0%              | 1445 | 29.6%              |           |
| 120-129 mmHg                          | 36752         | 19.1%              | 940  | 19.3%              |           |
| 130-139 mmHg                          | 28764         | 14.9%              | 725  | 14.9%              |           |
| 140-149 mmHg                          | 14043         | 7.3%               | 350  | 7.2%               |           |
| 150-159 mmHg                          | 5752          | 3.0%               | 124  | 2.5%               |           |

|                                     | Schizophrenia |                    |      |                    | P-values* |
|-------------------------------------|---------------|--------------------|------|--------------------|-----------|
|                                     | No            |                    | Yes  |                    |           |
|                                     | N             | Column Percent (%) | N    | Column Percent (%) |           |
| 160 mmHg or more                    | 1889          | 1.0%               | 53   | 1.1%               |           |
| <b>Smoking Status</b>               |               |                    |      |                    | 0.0843    |
| Missing                             | 40109         | 20.8%              | 968  | 19.8%              |           |
| Non-smoker                          | 125796        | 65.4%              | 2633 | 53.9%              |           |
| Smoker                              | 26522         | 13.8%              | 1281 | 26.2%              |           |
| <b>Type II Diabetes Mellitus</b>    |               |                    |      |                    | -         |
| No                                  | 168151        | 87.4%              | 3953 | 81.0%              |           |
| Yes                                 | 24276         | 12.6%              | 929  | 19.0%              |           |
| <b>Anti-Hypertensive medication</b> |               |                    |      |                    | -         |
| No                                  | 140415        | 73.0%              | 3486 | 71.4%              |           |
| Yes                                 | 52012         | 27.0%              | 1396 | 28.6%              |           |
| <b>Total</b>                        | 192427        | 100.0%             | 4882 | 100.0%             | -         |

497 \*p-values compare the proportion of missing data and non-missing data with respect to schizophrenia (using chi-square  
 498 test with false discovery rate).

499

500

501 Table 2. Calculable Framingham score with respect to individual Framingham factors

|                                   | Calculable Framingham Score |                 |       |                 | Total<br>N |
|-----------------------------------|-----------------------------|-----------------|-------|-----------------|------------|
|                                   | No                          |                 | Yes   |                 |            |
|                                   | N                           | Row Percent (%) | N     | Row Percent (%) |            |
| <b>Age range (years)</b>          |                             |                 |       |                 |            |
| 40-44 years                       | 21922                       | 74.9%           | 7352  | 25.1%           | 29274      |
| 45-49 years                       | 20367                       | 68.1%           | 9523  | 31.9%           | 29890      |
| 50-54 years                       | 19024                       | 60.0%           | 12699 | 40.0%           | 31723      |
| 55-59 years                       | 18106                       | 55.5%           | 14516 | 44.5%           | 32622      |
| 60-64 years                       | 14143                       | 50.9%           | 13625 | 49.1%           | 27768      |
| 65-69 years                       | 10565                       | 45.9%           | 12453 | 54.1%           | 23018      |
| 70-75 years                       | 10118                       | 44.0%           | 12896 | 56.0%           | 23014      |
| <b>Sex (M/F)</b>                  |                             |                 |       |                 |            |
| Female                            | 63352                       | 57.9%           | 46028 | 42.1%           | 109380     |
| Male                              | 50893                       | 57.9%           | 37036 | 42.1%           | 87929      |
| <b>HDL level (mmol/L)</b>         |                             |                 |       |                 |            |
| Missing                           | 81279                       | 100.0%          | .     | .               | 81279      |
| 0-0.89 mmol/L                     | 2408                        | 26.9%           | 6532  | 73.1%           | 8940       |
| 0.9-1.19 mmol/L                   | 7973                        | 27.7%           | 20818 | 72.3%           | 28791      |
| 1.2-1.29 mmol/L                   | 3092                        | 27.4%           | 8186  | 72.6%           | 11278      |
| 1.3-1.59 mmol/L                   | 8069                        | 27.8%           | 20947 | 72.2%           | 29016      |
| 1.60+ mmol/L                      | 11424                       | 30.1%           | 26581 | 69.9%           | 38005      |
| <b>Total cholesterol (mmol/L)</b> |                             |                 |       |                 |            |
| Missing                           | 82989                       | 100.0%          | .     | .               | 82989      |
| 0-4.09 mmol/L                     | 6336                        | 24.1%           | 19917 | 75.9%           | 26253      |
| 4.1-5.19 mmol/L                   | 11400                       | 27.9%           | 29469 | 72.1%           | 40869      |
| 5.2-6.19 mmol/L                   | 8686                        | 28.3%           | 21986 | 71.7%           | 30672      |

|                                       | Calculable Framingham Score |                 |       |                 | Total<br>N |
|---------------------------------------|-----------------------------|-----------------|-------|-----------------|------------|
|                                       | No                          |                 | Yes   |                 |            |
|                                       | N                           | Row Percent (%) | N     | Row Percent (%) |            |
| 6.2-7.19 mmol/L                       | 3167                        | 27.6%           | 8310  | 72.4%           | 11477      |
| 7.2+ mmol/L                           | 1667                        | 33.0%           | 3382  | 67.0%           | 5049       |
| <b>Systolic blood pressure (mmHg)</b> |                             |                 |       |                 |            |
| Missing                               | 62874                       | 98.0%           | 1305  | 2.0%            | 64179      |
| 120 mmHg or less                      | 18185                       | 41.6%           | 25553 | 58.4%           | 43738      |
| 120-129 mmHg                          | 14338                       | 38.0%           | 23354 | 62.0%           | 37692      |
| 130-139 mmHg                          | 10431                       | 35.4%           | 19058 | 64.6%           | 29489      |
| 140-149 mmHg                          | 5359                        | 37.2%           | 9034  | 62.8%           | 14393      |
| 150-159 mmHg                          | 2270                        | 38.6%           | 3606  | 61.4%           | 5876       |
| 160 mmHg or more                      | 788                         | 40.6%           | 1154  | 59.4%           | 1942       |
| <b>Smoking Status</b>                 |                             |                 |       |                 |            |
| Missing                               | 41077                       | 100.0%          | .     | .               | 41077      |
| Non-smoker                            | 58342                       | 45.4%           | 70087 | 54.6%           | 128429     |
| Smoker                                | 14826                       | 53.3%           | 12977 | 46.7%           | 27803      |
| <b>Type II Diabetes Mellitus</b>      |                             |                 |       |                 |            |
| No                                    | 105354                      | 61.2%           | 66750 | 38.8%           | 172104     |
| Yes                                   | 8891                        | 35.3%           | 16314 | 64.7%           | 25205      |
| <b>Anti-Hypertensive medication</b>   |                             |                 |       |                 |            |
| No                                    | 92342                       | 64.2%           | 51559 | 35.8%           | 143901     |
| Yes                                   | 21903                       | 41.0%           | 31505 | 59.0%           | 53408      |
| <b>Total</b>                          | 114245                      | 57.9%           | 83064 | 42.1%           | 197309     |

502

503

504

505

506 Table 3: Calculable Framingham score with respect to patient, provider and geographical

507 characteristics

|                                     | Calculable Framingham Score |                 |       |                 | Total<br>N |
|-------------------------------------|-----------------------------|-----------------|-------|-----------------|------------|
|                                     | No                          |                 | Yes   |                 |            |
|                                     | N                           | Row Percent (%) | N     | Row Percent (%) |            |
| <b>Schizophrenia</b>                |                             |                 |       |                 |            |
| No                                  | 111564                      | 58.0%           | 80863 | 42.0%           | 192427     |
| Yes                                 | 2681                        | 54.9%           | 2201  | 45.1%           | 4882       |
| <b>BMI level (Kg/m<sup>2</sup>)</b> |                             |                 |       |                 |            |
| Missing                             | 84398                       | 77.7%           | 24206 | 22.3%           | 108604     |
| 18.4 or less (Underweight)          | 378                         | 42.9%           | 503   | 57.1%           | 881        |
| 18.5 - 24.9 (Normal)                | 9191                        | 38.6%           | 14619 | 61.4%           | 23810      |
| 25 - 29.9 (overweight)              | 10622                       | 32.6%           | 21935 | 67.4%           | 32557      |
| 30 - 34.9 (Obese Class I)           | 5847                        | 30.5%           | 13331 | 69.5%           | 19178      |
| 35 - 39.9 (Obese Class II)          | 2306                        | 30.4%           | 5279  | 69.6%           | 7585       |
| 40 or more (Obese Class III)        | 1503                        | 32.0%           | 3191  | 68.0%           | 4694       |
| <b>No. of encounters</b>            |                             |                 |       |                 |            |
| Missing                             | 42673                       | 86.0%           | 6952  | 14.0%           | 49625      |



|                         | Calculable Framingham Score |                 |       |                 | Total<br>N |
|-------------------------|-----------------------------|-----------------|-------|-----------------|------------|
|                         | No                          |                 | Yes   |                 |            |
|                         | N                           | Row Percent (%) | N     | Row Percent (%) |            |
| 3-5 visits              | 25915                       | 58.6%           | 18311 | 41.4%           | 44226      |
| 6-9 visits              | 19861                       | 48.8%           | 20830 | 51.2%           | 40691      |
| >=10 visits             | 25796                       | 41.1%           | 36971 | 58.9%           | 62767      |
| <b>Income Quintiles</b> |                             |                 |       |                 |            |
| Missing                 | 14795                       | 58.9%           | 10326 | 41.1%           | 25121      |
| 1                       | 15851                       | 58.7%           | 11162 | 41.3%           | 27013      |
| 2                       | 15883                       | 58.3%           | 11348 | 41.7%           | 27231      |
| 3                       | 17118                       | 58.2%           | 12281 | 41.8%           | 29399      |
| 4                       | 20810                       | 57.8%           | 15221 | 42.2%           | 36031      |
| 5                       | 29788                       | 56.7%           | 22726 | 43.3%           | 52514      |
| <b>Region</b>           |                             |                 |       |                 |            |
| Missing                 | 2284                        | 73.6%           | 819   | 26.4%           | 3103       |
| Rural                   | 11590                       | 59.7%           | 7833  | 40.3%           | 19423      |
| Urban                   | 100371                      | 57.4%           | 74412 | 42.6%           | 174783     |
| <b>Provider age</b>     |                             |                 |       |                 |            |
| Missing                 | 5880                        | 50.6%           | 5741  | 49.4%           | 11621      |
| 29-39 years             | 21926                       | 54.1%           | 18618 | 45.9%           | 40544      |
| 40-49 years             | 23203                       | 58.4%           | 16550 | 41.6%           | 39753      |
| 50-59 years             | 29127                       | 55.9%           | 22943 | 44.1%           | 52070      |
| 60+ years               | 34109                       | 64.0%           | 19212 | 36.0%           | 53321      |
| <b>Provider sex</b>     |                             |                 |       |                 |            |
| Female                  | 52950                       | 54.2%           | 44655 | 45.8%           | 97605      |
| Male                    | 61295                       | 61.5%           | 38409 | 38.5%           | 99704      |
| <b>Total</b>            | 114245                      | 57.9%           | 83064 | 42.1%           | 197309     |

508  
509  
510  
511  
512  
513  
514  
515  
516  
517  
518  
519  
520  
521  
522  
523  
524  
525  
526  
527

1  
2  
3 528  
4 529  
5  
6 530  
7  
8  
9  
10  
11  
12  
13  
14  
15  
16  
17  
18  
19  
20  
21  
22  
23  
24  
25  
26  
27  
28  
29  
30  
31  
32  
33  
34  
35  
36  
37  
38  
39  
40  
41  
42  
43  
44  
45  
46  
47  
48  
49  
50  
51  
52  
53  
54  
55  
56  
57  
58  
59  
60

For peer review only

1  
2  
3  
4  
5  
6  
7  
8  
9  
10  
11  
12  
13  
14  
15  
16  
17  
18  
19  
20  
21  
22  
23  
24  
25  
26  
27  
28  
29  
30  
31  
32  
33  
34  
35  
36  
37  
38  
39  
40  
41  
42  
43  
44  
45  
46  
47  
48  
49  
50  
51  
52  
53  
54  
55  
56  
57  
58  
59  
60

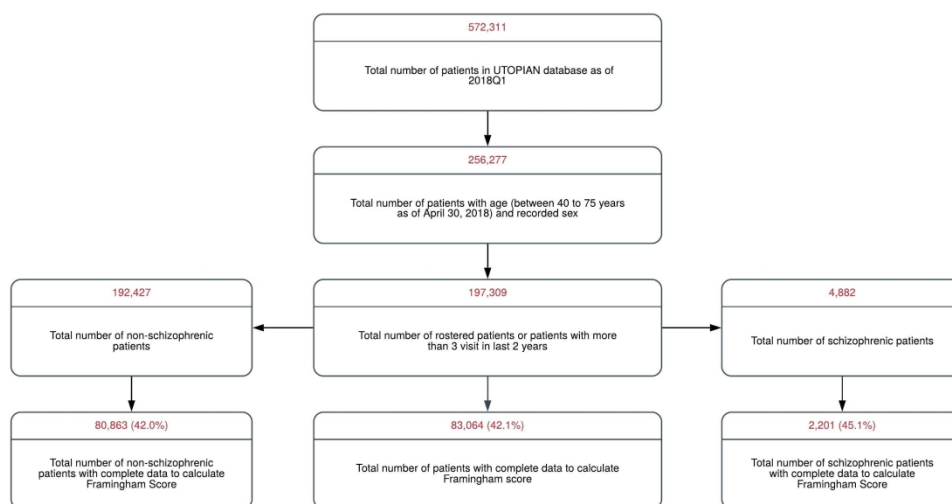

Distribution of Framingham risk factors among patients with and without schizophrenia

263x142mm (300 x 300 DPI)

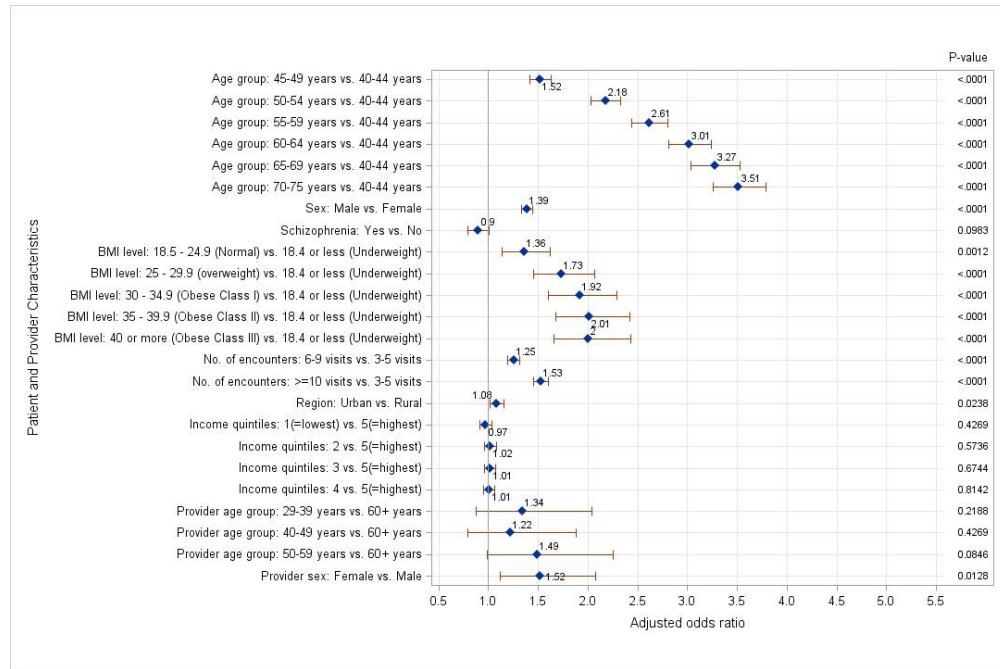

Adjusted odds ratios for calculable Framingham score using random-effects multilevel logistic regression model

285x190mm (96 x 96 DPI)

## Supplementary tables

Table S1: Unadjusted odds ratios for calculable Framingham score using random-effects multilevel logistic regression model

| Unadjusted odds ratio |                                 |                               |            |             |             |         |
|-----------------------|---------------------------------|-------------------------------|------------|-------------|-------------|---------|
| Characteristics       | Index group                     | Reference group               | Odds Ratio | Lower limit | Upper limit | P-value |
| Age                   | 45-49 years                     | 40-44 years                   | 1.49       | 1.434       | 1.547       | <.0001  |
| Age                   | 50-54 years                     | 40-44 years                   | 2.24       | 2.162       | 2.329       | <.0001  |
| Age                   | 55-59 years                     | 40-44 years                   | 2.78       | 2.681       | 2.887       | <.0001  |
| Age                   | 60-64 years                     | 40-44 years                   | 3.50       | 3.371       | 3.640       | <.0001  |
| Age                   | 65-69 years                     | 40-44 years                   | 4.44       | 4.266       | 4.626       | <.0001  |
| Age                   | 70-75 years                     | 40-44 years                   | 5.05       | 4.850       | 5.262       | <.0001  |
| Sex                   | Male                            | Female                        | 1.07       | 1.048       | 1.092       | <.0001  |
| Schizophrenia         | Yes                             | No                            | 1.25       | 1.173       | 1.327       | <.0001  |
| BMI level             | 18.5 - 24.9<br>(Normal)         | 18.4 or less<br>(Underweight) | 1.25       | 1.077       | 1.450       | 0.0043  |
| BMI level             | 25 - 29.9<br>(overweight)       | 18.4 or less<br>(Underweight) | 1.77       | 1.522       | 2.047       | <.0001  |
| BMI level             | 30 - 34.9<br>(Obese Class I)    | 18.4 or less<br>(Underweight) | 2.03       | 1.749       | 2.361       | <.0001  |
| BMI level             | 35 - 39.9<br>(Obese Class II)   | 18.4 or less<br>(Underweight) | 2.09       | 1.784       | 2.437       | <.0001  |
| BMI level             | 40 or more<br>(Obese Class III) | 18.4 or less<br>(Underweight) | 1.99       | 1.695       | 2.342       | <.0001  |
| No. of encounters     | 6-9 visits                      | 3-5 visits                    | 1.60       | 1.558       | 1.653       | <.0001  |
| No. of encounters     | >=10 visits                     | 3-5 visits                    | 2.39       | 2.320       | 2.455       | <.0001  |
| Region                | Urban                           | Rural                         | 1.06       | 1.026       | 1.105       | 0.0012  |
| Income quintiles      | 1(=lowest)                      | 5(=highest)                   | 1.04       | 1.004       | 1.075       | 0.0326  |
| Income quintiles      | 2                               | 5(=highest)                   | 1.05       | 1.020       | 1.089       | 0.0023  |
| Income quintiles      | 3                               | 5(=highest)                   | 1.04       | 1.005       | 1.071       | 0.0261  |
| Income quintiles      | 4                               | 5(=highest)                   | 1.00       | 0.974       | 1.034       | 0.8188  |
| Provider age          | 29-39 years                     | 60+ years                     | 1.69       | 1.225       | 2.334       | 0.0020  |
| Provider age          | 40-49 years                     | 60+ years                     | 1.36       | 0.972       | 1.914       | 0.0757  |
| Provider age          | 50-59 years                     | 60+ years                     | 1.38       | 0.986       | 1.944       | 0.0655  |
| Provider sex          | Female                          | Male                          | 1.61       | 1.296       | 2.012       | <.0001  |

Table S2: Adjusted odds ratios for calculable Framingham score using random-effects multilevel logistic regression model

| Adjusted odds ratio |                                 |                            |            |             |             |         |
|---------------------|---------------------------------|----------------------------|------------|-------------|-------------|---------|
| Characteristics     | Index group                     | Reference group            | Odds Ratio | Lower limit | Upper limit | P-value |
| Age group           | 45-49 years                     | 40-44 years                | 1.52       | 1.41        | 1.63        | <.0001  |
| Age group           | 50-54 years                     | 40-44 years                | 2.18       | 2.03        | 2.33        | <.0001  |
| Age group           | 55-59 years                     | 40-44 years                | 2.61       | 2.44        | 2.80        | <.0001  |
| Age group           | 65-69 years                     | 40-44 years                | 3.27       | 3.04        | 3.52        | <.0001  |
| Age group           | 70-75 years                     | 40-44 years                | 3.51       | 3.26        | 3.78        | <.0001  |
| Sex                 | Male                            | Female                     | 1.39       | 1.33        | 1.45        | <.0001  |
| Schizophrenia       | Yes                             | No                         | 0.90       | 0.79        | 1.01        | 0.0983  |
| BMI level           | 18.5 - 24.9<br>(Normal)         | 18.4 or less (Underweight) | 1.36       | 1.14        | 1.62        | 0.0012  |
| BMI level           | 25 - 29.9<br>(overweight)       | 18.4 or less (Underweight) | 1.73       | 1.45        | 2.07        | <.0001  |
| BMI level           | 30 - 34.9 (Obese<br>Class I)    | 18.4 or less (Underweight) | 1.92       | 1.60        | 2.29        | <.0001  |
| BMI level           | 35 - 39.9 (Obese<br>Class II)   | 18.4 or less (Underweight) | 2.01       | 1.67        | 2.42        | <.0001  |
| BMI level           | 40 or more<br>(Obese Class III) | 18.4 or less (Underweight) | 2.00       | 1.66        | 2.43        | <.0001  |
| No. of encounters   | 6-9 visits                      | 3-5 visits                 | 1.25       | 1.19        | 1.31        | <.0001  |
| No. of encounters   | >=10 visits                     | 3-5 visits                 | 1.53       | 1.46        | 1.60        | <.0001  |
| Region              | Urban                           | Rural                      | 1.08       | 1.02        | 1.16        | 0.0238  |
| Income quintiles    | 1(=lowest)                      | 5(=highest)                | 0.97       | 0.91        | 1.03        | 0.4269  |
| Income quintiles    | 2                               | 5(=highest)                | 1.02       | 0.96        | 1.08        | 0.5736  |
| Income quintiles    | 3                               | 5(=highest)                | 1.01       | 0.96        | 1.07        | 0.6744  |
| Income quintiles    | 4                               | 5(=highest)                | 1.01       | 0.96        | 1.06        | 0.8142  |
| Provider age group  | 29-39 years                     | 60+ years                  | 1.34       | 0.88        | 2.04        | 0.2188  |
| Provider age group  | 40-49 years                     | 60+ years                  | 1.22       | 0.79        | 1.88        | 0.4269  |
| Provider age group  | 50-59 years                     | 60+ years                  | 1.49       | 0.98        | 2.26        | 0.0846  |
| Provider sex        | Female                          | Male                       | 1.52       | 1.12        | 2.07        | 0.0128  |

STROBE Statement—Checklist of items that should be included in reports of *cohort studies***Cardiovascular disease risk in patients with schizophrenia: retrospective cohort study of risk factor documentation and management in primary care electronic medical records**

|                              | Item No | Recommendation                                                                                                                                                                                                                                                                                                         | Page No |
|------------------------------|---------|------------------------------------------------------------------------------------------------------------------------------------------------------------------------------------------------------------------------------------------------------------------------------------------------------------------------|---------|
| <b>Title and abstract</b>    | 1       | (a) Indicate the study's design with a commonly used term in the title or the abstract<br>(b) Provide in the abstract an informative and balanced summary of what was done and what was found                                                                                                                          | 1<br>2  |
| <b>Introduction</b>          |         |                                                                                                                                                                                                                                                                                                                        |         |
| Background/rationale         | 2       | Explain the scientific background and rationale for the investigation being reported                                                                                                                                                                                                                                   | 4       |
| Objectives                   | 3       | State specific objectives, including any prespecified hypotheses                                                                                                                                                                                                                                                       | 5       |
| <b>Methods</b>               |         |                                                                                                                                                                                                                                                                                                                        |         |
| Study design                 | 4       | Present key elements of study design early in the paper                                                                                                                                                                                                                                                                | 5       |
| Setting                      | 5       | Describe the setting, locations, and relevant dates, including periods of recruitment, exposure, follow-up, and data collection                                                                                                                                                                                        | 5       |
| Participants                 | 6       | (a) Give the eligibility criteria, and the sources and methods of selection of participants. Describe methods of follow-up<br>(b) For matched studies, give matching criteria and number of exposed and unexposed                                                                                                      | 6       |
| Variables                    | 7       | Clearly define all outcomes, exposures, predictors, potential confounders, and effect modifiers. Give diagnostic criteria, if applicable                                                                                                                                                                               | 6       |
| Data sources/<br>measurement | 8*      | For each variable of interest, give sources of data and details of methods of assessment (measurement). Describe comparability of assessment methods if there is more than one group                                                                                                                                   | 6       |
| Bias                         | 9       | Describe any efforts to address potential sources of bias                                                                                                                                                                                                                                                              | 7       |
| Study size                   | 10      | Explain how the study size was arrived at                                                                                                                                                                                                                                                                              | 7       |
| Quantitative variables       | 11      | Explain how quantitative variables were handled in the analyses. If applicable, describe which groupings were chosen and why                                                                                                                                                                                           | 7       |
| Statistical methods          | 12      | (a) Describe all statistical methods, including those used to control for confounding<br>(b) Describe any methods used to examine subgroups and interactions<br>(c) Explain how missing data were addressed<br>(d) If applicable, explain how loss to follow-up was addressed<br>(e) Describe any sensitivity analyses | 7       |
| <b>Results</b>               |         |                                                                                                                                                                                                                                                                                                                        |         |
| Participants                 | 13*     | (a) Report numbers of individuals at each stage of study—eg numbers potentially eligible, examined for eligibility, confirmed eligible, included in the study, completing follow-up, and analysed<br>(b) Give reasons for non-participation at each stage<br>(c) Consider use of a flow diagram                        | 7/8     |
| Descriptive data             | 14*     | (a) Give characteristics of study participants (eg demographic, clinical, social) and information on exposures and potential confounders<br>(b) Indicate number of participants with missing data for each variable of interest<br>(c) Summarise follow-up time (eg, average and total amount)                         | 8       |

|    |              |     |                                                                |   |
|----|--------------|-----|----------------------------------------------------------------|---|
| 1  | Outcome data | 15* | Report numbers of outcome events or summary measures over time | 8 |
| 2  |              |     |                                                                |   |
| 3  |              |     |                                                                |   |
| 4  |              |     |                                                                |   |
| 5  |              |     |                                                                |   |
| 6  |              |     |                                                                |   |
| 7  |              |     |                                                                |   |
| 8  |              |     |                                                                |   |
| 9  |              |     |                                                                |   |
| 10 |              |     |                                                                |   |
| 11 |              |     |                                                                |   |
| 12 |              |     |                                                                |   |
| 13 |              |     |                                                                |   |
| 14 |              |     |                                                                |   |
| 15 |              |     |                                                                |   |
| 16 |              |     |                                                                |   |
| 17 |              |     |                                                                |   |
| 18 |              |     |                                                                |   |
| 19 |              |     |                                                                |   |
| 20 |              |     |                                                                |   |
| 21 |              |     |                                                                |   |
| 22 |              |     |                                                                |   |
| 23 |              |     |                                                                |   |
| 24 |              |     |                                                                |   |
| 25 |              |     |                                                                |   |
| 26 |              |     |                                                                |   |
| 27 |              |     |                                                                |   |
| 28 |              |     |                                                                |   |
| 29 |              |     |                                                                |   |
| 30 |              |     |                                                                |   |
| 31 |              |     |                                                                |   |
| 32 |              |     |                                                                |   |
| 33 |              |     |                                                                |   |
| 34 |              |     |                                                                |   |
| 35 |              |     |                                                                |   |
| 36 |              |     |                                                                |   |
| 37 |              |     |                                                                |   |
| 38 |              |     |                                                                |   |
| 39 |              |     |                                                                |   |
| 40 |              |     |                                                                |   |
| 41 |              |     |                                                                |   |
| 42 |              |     |                                                                |   |
| 43 |              |     |                                                                |   |
| 44 |              |     |                                                                |   |
| 45 |              |     |                                                                |   |
| 46 |              |     |                                                                |   |
| 47 |              |     |                                                                |   |
| 48 |              |     |                                                                |   |
| 49 |              |     |                                                                |   |
| 50 |              |     |                                                                |   |
| 51 |              |     |                                                                |   |
| 52 |              |     |                                                                |   |
| 53 |              |     |                                                                |   |
| 54 |              |     |                                                                |   |
| 55 |              |     |                                                                |   |
| 56 |              |     |                                                                |   |
| 57 |              |     |                                                                |   |
| 58 |              |     |                                                                |   |
| 59 |              |     |                                                                |   |
| 60 |              |     |                                                                |   |

For peer review only



|    |                          |    |                                                                                                                                                                                                              |    |
|----|--------------------------|----|--------------------------------------------------------------------------------------------------------------------------------------------------------------------------------------------------------------|----|
| 1  | Main results             | 16 | (a) Give unadjusted estimates and, if applicable, confounder-adjusted estimates and their precision (eg, 95% confidence interval). Make clear which confounders were adjusted for and why they were included | 8  |
| 2  |                          |    | (b) Report category boundaries when continuous variables were categorized                                                                                                                                    |    |
| 3  |                          |    | (c) If relevant, consider translating estimates of relative risk into absolute risk for a meaningful time period                                                                                             |    |
| 4  |                          |    |                                                                                                                                                                                                              |    |
| 5  |                          |    |                                                                                                                                                                                                              |    |
| 6  |                          |    |                                                                                                                                                                                                              |    |
| 7  |                          |    |                                                                                                                                                                                                              |    |
| 8  |                          |    |                                                                                                                                                                                                              |    |
| 9  | Other analyses           | 17 | Report other analyses done—eg analyses of subgroups and interactions, and sensitivity analyses                                                                                                               | 9  |
| 10 |                          |    |                                                                                                                                                                                                              |    |
| 11 | <b>Discussion</b>        |    |                                                                                                                                                                                                              |    |
| 12 |                          |    |                                                                                                                                                                                                              |    |
| 13 | Key results              | 18 | Summarise key results with reference to study objectives                                                                                                                                                     | 9  |
| 14 | Limitations              | 19 | Discuss limitations of the study, taking into account sources of potential bias or imprecision. Discuss both direction and magnitude of any potential bias                                                   | 10 |
| 15 |                          |    |                                                                                                                                                                                                              |    |
| 16 | Interpretation           | 20 | Give a cautious overall interpretation of results considering objectives, limitations, multiplicity of analyses, results from similar studies, and other relevant evidence                                   | 10 |
| 17 |                          |    |                                                                                                                                                                                                              |    |
| 18 |                          |    |                                                                                                                                                                                                              |    |
| 19 | Generalisability         | 21 | Discuss the generalisability (external validity) of the study results                                                                                                                                        | 10 |
| 20 |                          |    |                                                                                                                                                                                                              |    |
| 21 | <b>Other information</b> |    |                                                                                                                                                                                                              |    |
| 22 | Funding                  | 22 | Give the source of funding and the role of the funders for the present study and, if applicable, for the original study on which the present article is based                                                | 1  |
| 23 |                          |    |                                                                                                                                                                                                              |    |
| 24 |                          |    |                                                                                                                                                                                                              |    |

\*Give information separately for exposed and unexposed groups.

**Note:** An Explanation and Elaboration article discusses each checklist item and gives methodological background and published examples of transparent reporting. The STROBE checklist is best used in conjunction with this article (freely available on the Web sites of PLoS Medicine at <http://www.plosmedicine.org/>, Annals of Internal Medicine at <http://www.annals.org/>, and Epidemiology at <http://www.epidem.com/>). Information on the STROBE Initiative is available at <http://www.strobe-statement.org>.

# BMJ Open

## Cardiovascular risk factor documentation and management in primary care electronic medical records among people with schizophrenia in Ontario, Canada: retrospective cohort study

|                                 |                                                                                                                                                                                                                                                                                                                                                                                                                                                                                                                                                                                                                                                    |
|---------------------------------|----------------------------------------------------------------------------------------------------------------------------------------------------------------------------------------------------------------------------------------------------------------------------------------------------------------------------------------------------------------------------------------------------------------------------------------------------------------------------------------------------------------------------------------------------------------------------------------------------------------------------------------------------|
| Journal:                        | <i>BMJ Open</i>                                                                                                                                                                                                                                                                                                                                                                                                                                                                                                                                                                                                                                    |
| Manuscript ID                   | bmjopen-2020-038013.R2                                                                                                                                                                                                                                                                                                                                                                                                                                                                                                                                                                                                                             |
| Article Type:                   | Original research                                                                                                                                                                                                                                                                                                                                                                                                                                                                                                                                                                                                                                  |
| Date Submitted by the Author:   | 06-Aug-2020                                                                                                                                                                                                                                                                                                                                                                                                                                                                                                                                                                                                                                        |
| Complete List of Authors:       | O'Neill, Braden; North York General Hospital, Family and Community Medicine; University of Toronto, Family and Community Medicine<br>Kalia, Sumeet; University of Toronto, Department of Family and Community Medicine<br>Aliarzadeh, Babak; University of Toronto, Department of Family and Community Medicine<br>Sullivan, Frank; University of St. Andrews, ; North York General hospital,<br><br>Moineddin, Rahim; University of Toronto, Family and Community Medicine<br>Kelly, Martina; University of Calgary Faculty of Medicine, DEPARTMENT OF FAMILY MEDICINE<br>Greiver, Michelle; University of Toronto, Family and Community Medicine |
| <b>Primary Subject Heading</b>: | General practice / Family practice                                                                                                                                                                                                                                                                                                                                                                                                                                                                                                                                                                                                                 |
| Secondary Subject Heading:      | Cardiovascular medicine, Health services research, Mental health                                                                                                                                                                                                                                                                                                                                                                                                                                                                                                                                                                                   |
| Keywords:                       | Health informatics < BIOTECHNOLOGY & BIOINFORMATICS, Cardiology < INTERNAL MEDICINE, MENTAL HEALTH, PRIMARY CARE, PREVENTIVE MEDICINE, Schizophrenia & psychotic disorders < PSYCHIATRY                                                                                                                                                                                                                                                                                                                                                                                                                                                            |
|                                 |                                                                                                                                                                                                                                                                                                                                                                                                                                                                                                                                                                                                                                                    |

SCHOLARONE™  
Manuscripts



I, the Submitting Author has the right to grant and does grant on behalf of all authors of the Work (as defined in the below author licence), an exclusive licence and/or a non-exclusive licence for contributions from authors who are: i) UK Crown employees; ii) where BMJ has agreed a CC-BY licence shall apply, and/or iii) in accordance with the terms applicable for US Federal Government officers or employees acting as part of their official duties; on a worldwide, perpetual, irrevocable, royalty-free basis to BMJ Publishing Group Ltd ("BMJ") its licensees and where the relevant Journal is co-owned by BMJ to the co-owners of the Journal, to publish the Work in this journal and any other BMJ products and to exploit all rights, as set out in our [licence](#).

The Submitting Author accepts and understands that any supply made under these terms is made by BMJ to the Submitting Author unless you are acting as an employee on behalf of your employer or a postgraduate student of an affiliated institution which is paying any applicable article publishing charge ("APC") for Open Access articles. Where the Submitting Author wishes to make the Work available on an Open Access basis (and intends to pay the relevant APC), the terms of reuse of such Open Access shall be governed by a Creative Commons licence – details of these licences and which [Creative Commons](#) licence will apply to this Work are set out in our licence referred to above.

Other than as permitted in any relevant BMJ Author's Self Archiving Policies, I confirm this Work has not been accepted for publication elsewhere, is not being considered for publication elsewhere and does not duplicate material already published. I confirm all authors consent to publication of this Work and authorise the granting of this licence.

1  
2  
3 1  
4  
5 2  
6  
7 3 **Cardiovascular risk factor documentation and management in primary care electronic**  
8 4 **medical records among people with schizophrenia in Ontario, Canada: retrospective**  
9 5 **cohort study**  
10  
11 6

13 7 Braden O'Neill<sup>1,2,3</sup>, Sumeet Kalia<sup>2</sup>, Babak Aliarzadeh<sup>2</sup>, Frank Sullivan<sup>1,4</sup>, Rahim Moineddin<sup>3</sup>,  
14 8 Martina Kelly<sup>5</sup>, Michelle Greiver<sup>1,2,3</sup>  
15  
16 9

18 10 <sup>1</sup>Department of Family and Community Medicine, North York General Hospital, Toronto,  
19 11 Ontario, Canada

21 12 <sup>2</sup>University of Toronto Practice-Based Research Network, Toronto, Ontario, Canada

23 13 <sup>3</sup>Department of Family and Community Medicine, Faculty of Medicine, University of Toronto,  
24 14 Ontario, Canada

26 15 <sup>4</sup>School of Medicine, University of St. Andrews, Fife, Scotland

28 16 <sup>5</sup>Department of Family Medicine, University of Calgary, Alberta, Canada  
29  
30  
31 17

32 18 Corresponding author:

34 19 Braden O'Neill

36 20 [braden.oneill@nygh.on.ca](mailto:braden.oneill@nygh.on.ca)  
37  
38  
39 21

40  
41 22 Funding: This study was funded by the Foundation for Advancing Family Medicine of the  
42 23 College of Family Physicians of Canada (2018 Janus Research Grant). Braden O'Neill  
43 24 completed this work during a Research Fellowship with the Medical Psychiatry Alliance,  
44 25 Toronto, Ontario.

46 26 Braden O'Neill and Michelle Greiver receive salary support from North York General Hospital  
47 27 and the Department of Family and Community Medicine, University of Toronto, Ontario,  
48 28 Canada.

50 29 Keywords: cardiovascular diseases; schizophrenia; primary health care; electronic health  
51 30 records; primary prevention

53 31 Word count: 2384  
54  
55 32  
56  
57  
58  
59  
60

33

**Abstract**

**Objectives:** In order to address the substantial increased risk of cardiovascular disease among people with schizophrenia, it is necessary to identify the factors responsible for some of that increased risk. We analyzed the extent to which these risk factors were documented in primary care electronic medical records, and compared their documentation by patient and provider characteristics.

**Design:** Retrospective cohort study

**Setting:** Electronic medical record (EMR) database of the University of Toronto Practice Based Research Network (UTOPIAN) Data Safe Haven.

**Participants:** 197129 adults between 40-75 years of age; 4882 with schizophrenia and 192247 without.

**Primary and secondary outcome measures:** Documentation of cardiovascular disease risk factors (age, sex, smoking history, presence of diabetes, blood pressure, whether a patient is currently on medication to reduce blood pressure, total cholesterol, and high density lipoprotein cholesterol)

**Results:** Documentation of cardiovascular risk factors was more complete among people with schizophrenia (74.5% of whom had blood pressure documented at least once in the last two years versus 67.3% of those without,  $p > 0.0001$ ). Smoking status was not documented in 19.8% of those with schizophrenia and 20.8% of those without ( $p = 0.0843$ ). Factors associated with improved documentation included older patients (OR for age 70-75 vs 45-49 = 3.51, 95% CI 3.26-3.78), male patients (OR = 1.39, 95% CI 1.33-1.45), patients cared for by a female provider (OR = 1.52, 95% CI: 1.12-2.07), and increased number of encounters (OR for  $\geq 10$  visits vs 3-5 visits = 1.53, 95% CI 1.46-1.60).

**Conclusions:** Documentation of cardiovascular risk factors was better among people with schizophrenia than without, although overall documentation was inadequate. Efforts to improve documentation of risk factors are warranted in order to facilitate improved management.

60

61

62

1  
2  
3 63  
4  
5 64  
6  
7 65  
8  
9 66  
10  
11 67  
12 68  
13  
14 69  
15  
16 70  
17  
18 71  
19  
20 72  
21  
22 73  
23  
24 74  
25  
26 75  
27  
28 76  
29  
30 77  
31  
32 78  
33  
34 79  
35  
36 80  
37  
38 81  
39  
40 82  
41  
42 83  
43  
44 84  
45  
46 85  
47  
48 86  
49  
50 87  
51  
52 88  
53  
54 89  
55  
56 90  
57  
58 91  
59  
60 92

### Strengths and limitations of the study

- This study analyzes data from the University of Toronto Practice-Based Research Network (UTOPIAN) Data Safe Haven, one of the world's largest primary care electronic medical record (EMR) databases
- It uses de-identified data from primary care charts to identify cardiovascular disease risk factors
- Strengths of the study include the sample size and the breadth of data included, from approximately 400 primary care clinics in Ontario, Canada
- Weaknesses include possible missing data resulting from the process of transferring data from primary care charts into a de-identified database, and the fact that the clinics included in the database are mainly urban and suburban academic clinics; these results may not necessarily be generalizable to all primary care settings

1  
2  
3 934  
5 946  
7 95 **Introduction**8  
9 96

10 97 High quality, comprehensive data are needed to understand health and how to improve it. Risk  
11 98 factors must be known and documented so that interventions can be planned and implemented.

14 99 One of the key challenges in primary care research has been the availability and quality of data.

16 100 When Julian Tudor Hart conducted research on patients accessing care in his practice in Wales in  
17 101 the 1970s, it required laboriously searching through individual paper charts to collect necessary  
18 102 data.(1) Today, electronic medical records are widely used and can facilitate instant searches at  
19 103 the practice level as well as at local and national levels through databases that aggregate data  
20 104 from multiple practices. However, several studies have demonstrated that important data – for  
21 105 example, regarding cardiovascular risk factors such as smoking and whether someone has a  
22 106 diagnosis of hypertension – remain incomplete.(2,3)

29 107 People with serious mental illnesses, particularly those with schizophrenia, die 8 to 10 years  
30 108 earlier than those without these conditions.(4,5) This is primarily due to higher rates of  
31 109 cardiovascular disease.(5-7) While the long-term metabolic effects of antipsychotic medications  
32 110 used to treat schizophrenia are unclear, their use is associated with increased weight and blood  
33 111 glucose.(8,9) Patients may also face challenges with self-care or accessing appropriate medical  
34 112 care.(10) To date there is sparse evidence about how to improve physical health status in these  
35 113 patients; a recent review of ‘collaborative care’ where both physical and mental health are  
36 114 attended to for these patients did not find any evidence of reductions in cardiovascular disease  
37 115 risk.(11)

45 116 The primary prevention of cardiovascular disease includes addressing risk factors such as  
46 117 tobacco use and hypertension; these are commonly managed in primary care. This is particularly  
47 118 true for people with serious mental illness, who are seen more frequently by family physicians  
48 119 than by psychiatrists.(12) The prevalence of schizophrenia in the general adult population is 1-  
49 120 3%, making it a relatively common condition.(13,14) The prevalence and frequency of  
50 121 interaction strongly supports the important role played by family medicine in reducing the risk of

1  
2  
3 122 cardiovascular disease for people with mental illness. To do this effectively it is necessary to  
4  
5 123 understand what that risk is and what variables should be focused on.  
6

7 124 As a first step in establishing patients' physical health status and identifying who to target for  
8  
9 125 interventions to improve health, it is necessary to understand their health status. Whether data  
10  
11 126 completeness concerns regarding cardiovascular disease risk are general to all patients or  
12  
13 127 whether they are more pronounced amongst those with serious mental illness is unknown.  
14

15 128 Our study objectives were: to describe documentation of cardiovascular disease risk factors  
16  
17 129 (HDL, LDL, total cholesterol; blood pressure; smoking status) among patients with and without  
18  
19 130 schizophrenia; and to explore patient and provider characteristics associated with sufficient  
20  
21 131 documentation of these risk factors to calculate the Framingham risk score for patients with  
22  
23 132 schizophrenia.  
24

25 133

## 26 134 **Methods**

27  
28 135

29  
30 136 This is an observational retrospective cohort study design. We applied the STrengthening the  
31  
32 137 Reporting of OBServational studies in Epidemiology checklist for reporting observational  
33  
34 138 studies.(15) Ethics approval was obtained from the North York General Hospital Research Ethics  
35  
36 139 Board, approval #18-0006.  
37

38 140

### 39 141 *Setting and data sources*

40 142

41  
42 143 We used data from the University of Toronto Practice-Based Research Network (UTOPIAN)  
43  
44 144 Data Safe Haven, a primary care electronic medical record (EMR) database; data extracted as of  
45  
46 145 April 1 2018 were used for this project.(16) The UTOPIAN Data Safe Haven contains EMR  
47  
48 146 records from over 550 000 patients who access care in primary care practices in the Greater  
49  
50 147 Toronto Area in Ontario, Canada. Physicians have consented to the provision of de-identified  
51  
52 148 data, housed in a secure environment. These data are used for quality improvement and research  
53  
54 149 purposes. The UTOPIAN database includes validated definitions for eight long-term conditions:  
55  
56 150 osteoarthritis, diabetes, epilepsy, parkinsonism, dementia, hypertension, COPD,  
57  
58  
59  
60



1  
2  
3 151 depression.(17,18) Neighbourhood level income quintiles are also available from patient  
4 152 residential postal codes using Statistics Canada's Postal Code Conversion Files.(19,20)

5  
6  
7 153

8 154

9  
10  
11 155 *Study population*

12 156

13  
14 157 We included patients 40-75 years of age because Canadian guidelines recommend regular  
15 158 screening for cardiovascular disease (CVD) risk in this age range. There is no clear consensus on  
16 159 the recommended interval for screening, which varies between yearly to every 5 years.(21-23)  
17 160 Guidelines suggest yearly CVD risk assessment for patients with schizophrenia (24); however  
18 161 these are not routinely followed in primary care practice and this increased frequency is  
19 162 consensus-based and not necessarily supported by strong evidence. We therefore chose to look at  
20 163 a two year interval in which screening could have taken place, recognizing that there may be  
21 164 some patients for whom it may be appropriate to screen less often. The most commonly used  
22 165 CVD risk assessment tool in Canadian primary care practice is the Framingham risk calculator  
23 166 (25), which includes the following items: (i) age, (ii) sex, (iii) smoking history, (iv) presence of  
24 167 diabetes, (v) systolic blood pressure (SBP), (vi) whether a patient is currently on medication to  
25 168 reduce blood pressure, (vii) total cholesterol, and (viii) high density lipoprotein (HDL)  
26 169 cholesterol. This is a validated risk stratification tool that establishes a patient's risk of  
27 170 developing cardiovascular disease (CVD; including: coronary death, myocardial infarction,  
28 171 coronary insufficiency, angina, ischemic stroke, hemorrhagic stroke, transient ischemic attack,  
29 172 peripheral artery disease, heart failure) within the next 10 years. It is valid for patients 30 – 74  
30 173 years of age.(25)

31 174

32 175 We identified patients that were 40-75 years of age as of March 31, 2018. We limited our cohort  
33 176 definition to those that had at least 3 primary care visits in the 2 year period between April 1,  
34 177 2016 and March 31, 2018. To identify outcomes we looked at whether people had CVD risk  
35 178 factors as outlined above documented at least once in the above period. This definition ensured  
36 179 that we included patients likely to be routinely followed by the providers whose records are  
37 180 included in the database, and is consistent with our usual approach for studies using this  
38 181 database. We identified patients with schizophrenia using the same definition used in a previous

1  
2  
3 182 study using the same database, using a combination of encounter diagnoses used for billing  
4  
5 183 purposes as well as documentation of the condition in the electronic medical record.(26)

6 184

7  
8 185

9  
10 186 *Statistical analysis*

11  
12 187

13  
14 188 We compared the documentation of cardiovascular disease (CVD) risk factors included in the  
15  
16 189 Framingham risk calculator between those with and without schizophrenia using a chi-square  
17  
18 190 test. P-values derived from multiple hypothesis tests were adjusted using false discovery rates. In  
19  
20 191 particular, the CVD risk factors included: HDL cholesterol, SBP, total cholesterol measured in  
21  
22 192 the last two years of study follow-up, and whether smoking status had ever been recorded. The  
23  
24 193 relationship between the complete documentation of all Framingham elements was also assessed  
25  
26 194 with respect to patient characteristics (age, sex, number of encounters in two years of study  
27  
28 195 follow-up, diagnosis of schizophrenia, most recent body mass index in the last two years of study  
29  
30 196 follow-up), provider characteristics (age, sex) and geographical characteristics (income quintiles,  
31  
32 197 rurality). A mixed-effects multilevel logistic regression was used to estimate unadjusted and  
33  
34 198 adjusted odds ratios for the complete documentation of all Framingham elements (i.e. calculable  
35  
36 199 Framingham score). Providers were specified as a random effect in the regression model.

37  
38 200

39  
40 201 All statistical analyses were generated using SAS software, version 9.4 M4 (SAS Institute). A  
41  
42 202 fixed nominal level of 0.05 was used to determine statistical significance in this study.

43  
44 203

45  
46 204 **Patient and public involvement:** There was no patient and public involvement in the design or  
47  
48 205 conduct of this study.

49  
50 206

51  
52 207

## 53 54 208 **Results**

55  
56 209 *Cohort generation*

57  
58 210

59  
60 211 Data from 376 physicians practicing in 96 different clinic sites were included. In total, 197,309  
212 patients were identified with age between 40-75 years old (as of March 31, 2018), recorded sex

1  
2  
3 213 and had at least 3 visits in the two years of interest (Figure 1). Out of 197,309 patients, 83,064  
4 214 patients (40.4%) had adequate data to calculate a Framingham risk score using the most recent  
5 215 data available for HDL, SBP, and total cholesterol in the last 2 years and smoking status ever  
6 216 recorded. Of these, 4880 patients met the definition of schizophrenia and 2130 (43.8%) of these  
7 217 patients with schizophrenia had complete documentation to calculate the Framingham risk score.  
8  
9

10 218

11 219 FIGURE 1 HERE

12 220

13 221 *Individual Framingham Data Elements*

14 222

15 223 We compared the presence of individual Framingham elements between 4882 patients with  
16 224 schizophrenia and 192247 patients without, over a two year look back window (April 1, 2016 –  
17 225 March 31, 2018) (Table 1). Framingham elements were documented more completely among  
18 226 those with schizophrenia: 25.5% of those with schizophrenia and 32.7% of those without had no  
19 227 documented blood pressure readings over the last two years ( $p < 0.0001$ ). 39.2% of those with  
20 228 schizophrenia and 42.1% of those without did not have any cholesterol readings ( $p < 0.0001$ ).  
21 229 There was no difference in documentation of smoking status between the two groups ( $p = 0.084$ ),  
22 230 with documentation missing in approximately 20% of all charts.  
23  
24  
25  
26  
27  
28  
29  
30  
31  
32  
33

34 231

35 232 TABLE 1 HERE

36 233

37 234 *Patient, provider and geographical characteristics as predictors of calculable Framingham*  
38 235 *score*  
39  
40  
41  
42

43 236

44 237 Individual patient characteristics between those who had complete documentation of  
45 238 Framingham score factors and those who did not are in Table 2 and Table 3. Unadjusted and  
46 239 adjusted odds ratios for the complete documentation of Framingham score are in supplementary  
47 240 Table S1 and Table S2.  
48  
49  
50

51 241

52 242 Patients with schizophrenia did not have statistically significant decreased adjusted odds for the  
53 243 complete documentation of Framingham score as compared to patients without schizophrenia,  
54  
55  
56  
57  
58  
59  
60

244 (OR = 0.90, 95% CI 0.79 – 1.01, p-value=0.10) (Figure 2). The adjusted odds for the complete  
245 documentation of Framingham factors increased with respect to the patient's age (70-75 years vs  
246 40-44 years OR = 3.51, 95% CI 3.26 – 3.78). Male patients had increased adjusted odds of  
247 calculable Framingham score as compared to female patients (male vs. female OR = 1.39, 95%  
248 CI 1.33 – 1.45). An increase in the BMI level was associated with an increase in adjusted odds  
249 for calculable Framingham score (Obese class III vs. Underweight, OR = 2.00, 95% CI 1.66 –  
250 2.43) (Table 3). An increase in the total number of encounters also led to increased adjusted odds  
251 for the complete documentation of Framingham factors (more than 10 visits vs. 3-5 visits in last  
252 two years OR = 1.53, 95% CI 1.46 – 1.60).

253

254 TABLE 2 HERE

255 Patients residing in urban regions had higher adjusted odds for the complete documentation of  
256 Framingham factors as compared to patients residing in rural regions (OR=1.08, 95% CI: 1.02 –  
257 1.16). However, no significant differences in adjusted odds ratios were detected across the five  
258 levels of income quintiles (1 vs 5, OR=0.97, 95% CI: 0.91-1.03, p-value=0.43). Female  
259 physicians had increased adjusted odds for the complete documentation of Framingham factors  
260 as compared to male physicians (OR=1.52, 95% CI: 1.12 – 2.07). However, provider age did not  
261 contribute to increased or decreased adjusted odds for calculable Framingham score (29-39 years  
262 vs. 60+ years, OR=1.49, 95% CI: 0.98 – 2.26, p-value=0.08).

263

264 TABLE 3 HERE

265

## 266 Discussion

267

268 In this study of primary care electronic medical records from the University of Toronto Practice-  
269 Based Research Network, we found better documentation of cardiovascular risk factors among  
270 people with schizophrenia as opposed to those without the condition. However, overall  
271 documentation was inadequate.

272 Other studies on preventive health for people with schizophrenia, such as those addressing  
273 cancer screening, have found lower rates of preventive care when compared with the general

1  
2  
3 274 population.(27) We actually found more complete documentation of some risk factors among  
4  
5 275 people with schizophrenia when compared to those without, such as blood pressure. There are  
6  
7 276 various recommendations for frequency of cardiovascular disease risk screening in the general  
8  
9 277 population; Allan et al suggested every 5 years for men over 40 and women over 50.(23) More  
10  
11 278 complete documentation of risk factors would be expected based on guidelines suggesting more  
12  
13 279 frequent cardiovascular disease risk assessment among people who are on antipsychotic  
14  
15 280 medication.(14) To some extent the present study demonstrates a promising finding, suggesting  
16  
17 281 that patients with schizophrenia are receiving at least as good care from this perspective as those  
18  
19 282 without the condition. It is, however, quite concerning that there are substantial gaps in  
20  
21 283 documentation of particular risk factors such as smoking cessation. Nearly 20% of patients did  
22  
23 284 not have smoking status documented in the chart. We suggest that if it is not documented, then it  
24  
25 285 is extremely unlikely that smoking cessation has been addressed at a primary care visit. Smoking  
26  
27 286 is highly prevalent among people with schizophrenia; Canadian estimates range from 47% (28)  
28  
29 287 and 78% (29). There are many effective interventions to support patients with schizophrenia to  
30  
31 288 stop smoking.(30) It is therefore essential to document smoking status for all patients with  
32  
33 289 schizophrenia and to make smoking cessation a priority.

34  
35  
36 290 We found several factors associated with what we assessed to be ‘appropriate’ documentation of  
37  
38 291 risk factors sufficient for cardiovascular risk assessment.

39  
40 292 Limitations of this study include the use of EMR data, which is known to have deficiencies  
41  
42 293 around data quality and completeness.(31, 32) UTOPIAN, as part of the Canadian Primary Care  
43  
44 294 Sentinel Surveillance Network, is disproportionately comprised of more providers in academic  
45  
46 295 practices and has an older population than the Canadian average.(33) These findings therefore  
47  
48 296 may not be generalizable to all Canadian primary care settings. UTOPIAN contains data from  
49  
50 297 multiple EMR vendors and as a consequence there is the possibility that some data may be  
51  
52 298 missing as a result of errors in database formation; these data are extracted with the best  
53  
54 299 available approaches and regular data cleaning attempts to minimize these errors. Other studies  
55  
56 300 have found some deficiencies, particularly related to documentation of health conditions, in  
57  
58 301 EMR data in the Canadian setting.(3) There are no Canadian national standards for necessary  
59  
60 302 elements of EMR documentation in primary care. In Ontario, laboratory results enter most  
303  
304 303 physicians’ EMRs through the Ontario Laboratory Information System (34) which is an

1  
2  
3 304 automatic process, reducing the extent to which documentation is incomplete because of  
4  
5 305 provider error. Primary care providers therefore receive test results from all other providers  
6  
7 306 involved in a patient's care, making primary care records an appropriate location to assess these  
8  
9 307 parameters. Our focus on 'documentation' in this study is as a result of the practical principle  
10  
11 308 that if something is not documented, it cannot be acted on; therefore data documentation and  
12  
13 309 completeness are being taken as a proxy for their consideration in clinical decision-making. We  
14  
15 310 acknowledge that this approach may result in 'overestimation' of the extent to which  
16  
17 311 cardiovascular disease risk screening is occurring for patients with schizophrenia. It is possible to  
18  
19 312 have all of the Framingham items documented in the medical record but not to have brought  
20  
21 313 them together to estimate overall cardiovascular risk. However, given the primary conclusion  
22  
23 314 that cardiovascular risk screening is inadequate in this sample, the study methods biasing  
24  
25 315 towards 'overestimation', if anything, support this main finding. It is not possible from the data  
26  
27 316 considered in this study to ascertain whether a provider has attempted to intervene towards  
28  
29 317 smoking cessation, or whether someone has addressed blood pressure management. There are  
30  
31 318 other available risk stratification approaches available both for the general population [such as  
32  
33 319 QRISK2 (35)] and specifically for people with serious mental illness [PRIMROSE (36)]. We  
34  
35 320 chose to focus on the Framingham assessment because it is the most commonly used in Canadian  
36  
37 321 primary care and therefore would be most relevant to the study context.

38  
39 322 In summary, we found slightly more complete documentation of cardiovascular risk factors and  
40  
41 323 their management among people with schizophrenia as opposed to those without this condition.  
42  
43 324 However, overall documentation of these risk factors remains incomplete. Adequate  
44  
45 325 cardiovascular disease risk assessment is essential to identifying and addressing risk factors,  
46  
47 326 particularly among people with schizophrenia who have much higher mortality from  
48  
49 327 cardiovascular disease (and other conditions) than the general public. Efforts should be  
50  
51 328 undertaken in primary care to improve data completeness and CVD risk assessment and  
52  
53 329 management.

54  
55 330

56  
57 331 **Conflicts of interest:** All authors report that they have no conflicts of interest to declare.  
58  
59

1  
2  
3 332 **Data statement:** Data from this study are held by the University of Toronto Practice-Based  
4  
5 333 Research Network; ethics approval for this study does not allow unrestricted public access to the  
6  
7 334 data. Please contact the corresponding author for information on how to access.

8  
9 335 **Author statement:** BO, SK, BA, FS, RM, MK, MG contributed to the initial conception of the  
10  
11 336 study. BO, SK, BA, RM made substantial contributions to the statistical methodology, analysis  
12  
13 337 and data interpretation. BO and SK wrote the first draft of the manuscript. BO, SK, BA, FS, MK,  
14  
15 338 MG provided substantial revisions to the manuscript.

16  
17 339

18  
19 340 Figure legends:

20  
21  
22 341 Figure 1: Distribution of Framingham risk factors among patients with and without  
23 342 schizophrenia

24 343

25  
26  
27 344 Figure 2: Adjusted odds ratios for calculable Framingham score using random-effects multilevel  
28 345 logistic regression model

29 346

30  
31  
32 347

33  
34 348

35  
36 349

37  
38 350

39  
40 351

41  
42 352

43  
44 353

45  
46 354

47  
48 355

49  
50 356

51  
52 357

53  
54 358

55  
56 359

57  
58 360

59  
60

359 **References**

- 360 1. Hart JT. The inverse care law. *Lancet*. 1971 Feb 27;297(7696):405-12.
- 361 362 2. Greiver M, Aliarzadeh B, Meaney C, Moineddin R, Southgate CA, Barber DT, White  
363 DG, Martin KB, Ikhtiar T, Williamson T. Are we asking patients if they smoke? Missing  
364 information on tobacco use in Canadian electronic medical records. *Am J Prevent Med*.  
365 2015 Aug 31;49(2):264-8.
- 366 367 3. Singer A, Yakubovich S, Kroeker AL, Dufault B, Duarte R, Katz A. Data quality of  
368 electronic medical records in Manitoba: do problem lists accurately reflect chronic  
369 disease billing diagnoses? *J Am Med Inform Assoc*. 2016 Apr 23;23(6):1107-12.
- 370 371 4. Walker ER, McGee RE, Druss BG. Mortality in mental disorders and global disease  
372 burden implications: a systematic review and meta-analysis. *JAMA Psych*. 2015 Apr  
373 1;72(4):334-41.
- 374 375 5. Gatov E, Rosella L, Chiu M, Kurdyak P. Trends in standardized mortality among  
376 individuals with schizophrenia, 1993–2012: a population-based, repeated cross-sectional  
377 study. *CMAJ* 2017;189:e1177-87.
- 378 379 6. Hennekens CH, Hennekens AR, Hollar D, Casey DE. Schizophrenia and increased risks  
380 of cardiovascular disease. *Am Heart J*. 2005 Dec 31;150(6):1115-21.
- 381 382 7. Goldstein BI, Fagiolini A, Houck P, Kupfer DJ. Cardiovascular disease and hypertension  
383 among adults with bipolar I disorder in the United States. *Bipolar Disor*. 2009 Sep  
384 1;11(6):657-62.
- 385 386 8. Hirsch L, Yang J, Bresee L, Jette N, Patten S, Pringsheim T. Second-generation antipsychotics  
387 and metabolic side effects: a systematic review of population-based studies. *Drug safety*. 2017  
388 Sep 1;40(9):771-81.
- 389 390 9. Spertus J, Horvitz-Lennon M, Abing H, Normand SL. Risk of weight gain for specific antipsychotic  
391 drugs: a meta-analysis. *NPJ schizophrenia*. 2018 Jun 27;4(1):1-7.
- 392 393 10. De Hert M, Dekker JM, Wood D, Kahl KG, Holt RI, Möller HJ. Cardiovascular disease  
394 and diabetes in people with severe mental illness position statement from the European  
395 Psychiatric Association (EPA), supported by the European Association for the Study of  
396 Diabetes (EASD) and the European Society of Cardiology (ESC). *European Psych*. 2009  
397 Sep 1;24(6):412-24.
- 398



- 1  
2  
3 399 11. Bullock HL, Waddell K, & Wilson MG. Rapid synthesis: Identifying and assessing core  
4 400 components of collaborative-care models for treating mental and physical health  
5 401 conditions. Hamilton, Canada: McMaster Health Forum, 31 March 2017.  
6 402  
7 403  
8 403 12. Slomp M, Bland R, Patterson S, Whittaker L. Three-year physician treated prevalence  
9 404 rate of mental disorders in Alberta. *Can J Psych*. 2009 Mar;54(3):199-203.  
10 405  
11 406  
12 407 13. Government of Canada [Internet]: Ottawa, ON. Chapter 3: Schizophrenia – A report on  
13 408 mental illnesses in Canada. 2012. [cited 31 January 2018] Available from:  
14 409 [https://www.canada.ca/en/public-health/services/reports-publications/report-on-mental-](https://www.canada.ca/en/public-health/services/reports-publications/report-on-mental-illnesses-canada/schizophrenia.htm)  
15 410 [illnesses-canada/schizophrenia.htm](https://www.canada.ca/en/public-health/services/reports-publications/report-on-mental-illnesses-canada/schizophrenia.htm)  
16 411  
17 412 14. Saha S, Chant D, Welham J, McGrath J. A systematic review of the prevalence of  
18 413 schizophrenia. *PLoS medicine*. 2005 May 31;2(5):e141.  
19 414  
20 415 15. von Elm E , Altman DG , Egger M , et al. The Strengthening the Reporting of  
21 416 Observational Studies in Epidemiology (STROBE) Statement: guidelines for reporting  
22 417 observational studies. *Int J Surg* 2014;12:1495–9.doi:10.1016/j.ijisu.2014.07.013  
23 418  
24 419 16. University of Toronto Department of Family and Community Medicine [Internet].  
25 420 University of Toronto Practice Based Research Network (UTOPIAN). [cited 31 January  
26 421 2018] Available from: <https://www.dfc.utoronto.ca/landing-page/utopian>  
27 422  
28 423 17. CPCSSN Team, Case Definitions: Canadian Primary Care Sentinel Surveillance Network  
29 424 (CPCSSN), Version 2. July 16, 2019. URL: [http://cpcssn.ca/research-resources/cpcssn-](http://cpcssn.ca/research-resources/cpcssn-case-definitions-v2)  
30 425 [case-definitions-v2](http://cpcssn.ca/research-resources/cpcssn-case-definitions-v2)  
31 426  
32 427 18. Williamson T, Green ME, Birtwhistle R, Khan S, Garies S, Wong ST, Natarajan N,  
33 428 Manca D, Drummond N. Validating the 8 CPCSSN case definitions for chronic disease  
34 429 surveillance in a primary care database of electronic health records. *Ann Fam Med*. 2014  
35 430 Jul 1;12(4):367-72.  
36 431  
37 432 19. Wilkins R. Use of postal codes and addresses in the analysis of health data. *Health*  
38 433 *Reports*. 1993;5(2):157–77. pmid:8292756  
39 434  
40 435 20. Pampalon R, Hamel D, Gamache P, Raymond G. A deprivation index for health planning  
41 436 in Canada. *Chronic Dis Can*. 2009 Jan 1;29(4):178–91. pmid:1980468  
42 437  
43 438 21. Genest J, McPherson R, Frohlich J, Anderson T, Campbell N, Carpentier A, Couture P,  
44 439 Dufour R, Fodor G, Francis GA, Grover S. 2009 Canadian Cardiovascular

- 1  
2  
3 440 Society/Canadian guidelines for the diagnosis and treatment of dyslipidemia and  
4 441 prevention of cardiovascular disease in the adult—2009 recommendations. Canadian  
5 442 Journal of Cardiology. 2009 Oct 1;25(10):567-79.  
6 443  
7 444  
8 444 22. Anderson TJ, Grégoire J, Hegele RA, Couture P, Mancini GJ, McPherson R, Francis GA,  
9 445 Poirier P, Lau DC, Grover S, Genest Jr J. 2012 update of the Canadian Cardiovascular  
10 446 Society guidelines for the diagnosis and treatment of dyslipidemia for the prevention of  
11 447 cardiovascular disease in the adult. Canadian Journal of Cardiology. 2013 Feb  
12 448 1;29(2):151-67.  
13 449  
14 450  
15 450 23. Allan GM, Lindblad AJ, Comeau A, Coppola J, Hudson B, Mannarino M, McMinis C,  
16 451 Padwal R, Schelstraete C, Zarnke K, Garrison S. Simplified lipid guidelines: Prevention  
17 452 and management of cardiovascular disease in primary care. Canadian Family Physician.  
18 453 2015 Oct 1;61(10):857-67.  
19 454  
20 455 24. Pringsheim T, Kelly M, Urness D, Teehan M, Ismail Z, Gardner D. Physical Health and  
21 456 Drug Safety in individuals with schizophrenia. Can J Psych. 2017 Sep;62(9):673-83.  
22 457  
23 458 25. D'Agostino RB, Vasan RS, Pencina MJ, Wolf PA, Cobain M, Massaro JM, Kannel WB.  
24 459 General cardiovascular risk profile for use in primary care. Circulation. 2008 Feb  
25 460 12;117(6):743-53.  
26 461  
27 462 26. O'Neill B, Kalia S, Aliarzadeh B, Moineddin R, Fung WL, Sullivan F, Maloul A,  
28 463 Bernard S, Greiver M. Agreement between primary care and hospital diagnosis of  
29 464 schizophrenia and bipolar disorder: A cross-sectional, observational study using record  
30 465 linkage. PLOS One. 2019 Jan 7;14(1):e0210214.  
31 466  
32 467 27. Martens PJ, Chochinov HM, Prior HJ, Fransoo R, Burland E, Team TN. Are cervical  
33 468 cancer screening rates different for women with schizophrenia? A Manitoba population-  
34 469 based study. Schizophrenia research. 2009 Aug 1;113(1):101-6.  
35 470  
36 471 28. Johnson JL, Ratner PA, Malchy LA, Okoli CT, Procyshyn RM, Bottorff JL, Groening M,  
37 472 Schultz A, Osborne M. Gender-specific profiles of tobacco use among non-  
38 473 institutionalized people with serious mental illness. BMC psychiatry. 2010  
39 474 Dec;10(1):101.  
40 475  
41 476 29. Gerber, G.J., Krupa, T., Eastabrook, S., Gargaro, J., 2003. Substance use among persons  
42 477 with serious mental illness in eastern Ontario. Can J Community Ment Health 22, 113 –  
43 478 128.  
44 479

- 1  
2  
3 480 30. Tsoi DT, Porwal M, Webster AC. Interventions for smoking cessation and reduction in  
4 481 individuals with schizophrenia. *Cochrane Database Sys Rev.* 2013(2).  
5 482  
6 483 31. Weiskopf NG, Weng C. Methods and dimensions of electronic health record data quality  
7 484 assessment: enabling reuse for clinical research. *J Am Inform Assoc.* 2013 Jan  
8 485 1;20(1):144-51.  
9 486  
10 487 32. Birtwhistle R, Williamson T. Primary care electronic medical records: a new data source  
11 488 for research in Canada. *CMAJ.* 2015 Mar 3;187(4):239-40.  
12 489  
13 490 33. Queenan JA, Williamson T, Khan S, Drummond N, Garies S, Morkem R, Birtwhistle R.  
14 491 Representativeness of patients and providers in the Canadian Primary Care Sentinel  
15 492 Surveillance Network: a cross-sectional study. *CMAJ Open.* 2016 Jan;4(1):E28.  
16 493  
17 494 34. Ontario Laboratory Information System. eHealth Ontario.  
18 495 [https://www.ehealthontario.on.ca/en/for-healthcare-professionals/ontario-laboratories-](https://www.ehealthontario.on.ca/en/for-healthcare-professionals/ontario-laboratories-information-system-olis)  
19 496 [information-system-olis](https://www.ehealthontario.on.ca/en/for-healthcare-professionals/ontario-laboratories-information-system-olis)  
20 497  
21 498 35. Hippisley-Cox J, Coupland C, Vinogradova Y, Robson J, Brindle P. Performance of the  
22 499 QRISK cardiovascular risk prediction algorithm in an independent UK sample of patients  
23 500 from general practice: a validation study. *Heart.* 2008 Jan 1;94(1):34-9.  
24 501  
25 502 36. Zomer E, Osborn D, Nazareth I, Blackburn R, Burton A, Hardoon S, Holt RI, King M,  
26 503 Marston L, Morris S, Omar R. Effectiveness and cost-effectiveness of a cardiovascular  
27 504 risk prediction algorithm for people with severe mental illness (PRIMROSE). *BMJ open.*  
28 505 2017 Sep 1;7(9):e018181.  
29 506  
30 507  
31 508  
32 509  
33 510  
34 511  
35 512  
36 513  
37 514  
38 515  
39 516  
40 517  
41 518  
42 519

## Tables

Table 1. Distribution of Framingham factors among patients with and without schizophrenia

|                                       | Schizophrenia |                    |      |                    | P-values* |
|---------------------------------------|---------------|--------------------|------|--------------------|-----------|
|                                       | No            |                    | Yes  |                    |           |
|                                       | N             | Column Percent (%) | N    | Column Percent (%) |           |
| <b>Age range (years)</b>              |               |                    |      |                    | -         |
| 40-44 years                           | 28574         | 14.8%              | 700  | 14.3%              |           |
| 45-49 years                           | 29137         | 15.1%              | 753  | 15.4%              |           |
| 50-54 years                           | 30939         | 16.1%              | 784  | 16.1%              |           |
| 55-59 years                           | 31790         | 16.5%              | 832  | 17.0%              |           |
| 60-64 years                           | 27061         | 14.1%              | 707  | 14.5%              |           |
| 65-69 years                           | 22430         | 11.7%              | 588  | 12.0%              |           |
| 70-75 years                           | 22496         | 11.7%              | 518  | 10.6%              |           |
| <b>Sex (M/F)</b>                      |               |                    |      |                    | -         |
| Female                                | 106841        | 55.5%              | 2539 | 52.0%              |           |
| Male                                  | 85586         | 44.5%              | 2343 | 48.0%              |           |
| <b>HDL level (mmol/L)</b>             |               |                    |      |                    | <0.0001   |
| Missing                               | 79437         | 41.3%              | 1842 | 37.7%              |           |
| 0-0.89 mmol/L                         | 8565          | 4.5%               | 375  | 7.7%               |           |
| 0.9-1.19 mmol/L                       | 27925         | 14.5%              | 866  | 17.7%              |           |
| 1.2-1.29 mmol/L                       | 11006         | 5.7%               | 272  | 5.6%               |           |
| 1.3-1.59 mmol/L                       | 28313         | 14.7%              | 703  | 14.4%              |           |
| 1.60+ mmol/L                          | 37181         | 19.3%              | 824  | 16.9%              |           |
| <b>Total cholesterol (mmol/L)</b>     |               |                    |      |                    | <0.0001   |
| Missing                               | 81073         | 42.1%              | 1916 | 39.2%              |           |
| 0-4.09 mmol/L                         | 25388         | 13.2%              | 865  | 17.7%              |           |
| 4.1-5.19 mmol/L                       | 39801         | 20.7%              | 1068 | 21.9%              |           |
| 5.2-6.19 mmol/L                       | 30009         | 15.6%              | 663  | 13.6%              |           |
| 6.2-7.19 mmol/L                       | 11225         | 5.8%               | 252  | 5.2%               |           |
| 7.2+ mmol/L                           | 4931          | 2.6%               | 118  | 2.4%               |           |
| <b>Systolic blood pressure (mmHg)</b> |               |                    |      |                    | <0.0001   |
| Missing                               | 62934         | 32.7%              | 1245 | 25.5%              |           |
| 120 mmHg or less                      | 42293         | 22.0%              | 1445 | 29.6%              |           |
| 120-129 mmHg                          | 36752         | 19.1%              | 940  | 19.3%              |           |
| 130-139 mmHg                          | 28764         | 14.9%              | 725  | 14.9%              |           |
| 140-149 mmHg                          | 14043         | 7.3%               | 350  | 7.2%               |           |
| 150-159 mmHg                          | 5752          | 3.0%               | 124  | 2.5%               |           |
| 160 mmHg or more                      | 1889          | 1.0%               | 53   | 1.1%               |           |
| <b>Smoking Status</b>                 |               |                    |      |                    | 0.0843    |
| Missing                               | 40109         | 20.8%              | 968  | 19.8%              |           |
| Non-smoker                            | 125796        | 65.4%              | 2633 | 53.9%              |           |
| Smoker                                | 26522         | 13.8%              | 1281 | 26.2%              |           |
| <b>Type II Diabetes Mellitus</b>      |               |                    |      |                    | -         |
| No                                    | 168151        | 87.4%              | 3953 | 81.0%              |           |
| Yes                                   | 24276         | 12.6%              | 929  | 19.0%              |           |
| <b>Anti-Hypertensive medication</b>   |               |                    |      |                    | -         |
| No                                    | 140415        | 73.0%              | 3486 | 71.4%              |           |
| Yes                                   | 52012         | 27.0%              | 1396 | 28.6%              |           |

|              | Schizophrenia |                    |      |                    | P-values* |
|--------------|---------------|--------------------|------|--------------------|-----------|
|              | No            |                    | Yes  |                    |           |
|              | N             | Column Percent (%) | N    | Column Percent (%) |           |
| <b>Total</b> | 192427        | 100.0%             | 4882 | 100.0%             | -         |

520 \*p-values compare the proportion of missing data and non-missing data with respect to schizophrenia (using chi-square  
521 test with false discovery rate).

522

523

524 Table 2. Calculable Framingham score with respect to individual Framingham factors

|                                       | Calculable Framingham Score |                 |       |                 | Total<br>N |
|---------------------------------------|-----------------------------|-----------------|-------|-----------------|------------|
|                                       | No                          |                 | Yes   |                 |            |
|                                       | N                           | Row Percent (%) | N     | Row Percent (%) |            |
| <b>Age range (years)</b>              |                             |                 |       |                 |            |
| 40-44 years                           | 21922                       | 74.9%           | 7352  | 25.1%           | 29274      |
| 45-49 years                           | 20367                       | 68.1%           | 9523  | 31.9%           | 29890      |
| 50-54 years                           | 19024                       | 60.0%           | 12699 | 40.0%           | 31723      |
| 55-59 years                           | 18106                       | 55.5%           | 14516 | 44.5%           | 32622      |
| 60-64 years                           | 14143                       | 50.9%           | 13625 | 49.1%           | 27768      |
| 65-69 years                           | 10565                       | 45.9%           | 12453 | 54.1%           | 23018      |
| 70-75 years                           | 10118                       | 44.0%           | 12896 | 56.0%           | 23014      |
| <b>Sex (M/F)</b>                      |                             |                 |       |                 |            |
| Female                                | 63352                       | 57.9%           | 46028 | 42.1%           | 109380     |
| Male                                  | 50893                       | 57.9%           | 37036 | 42.1%           | 87929      |
| <b>HDL level (mmol/L)</b>             |                             |                 |       |                 |            |
| Missing                               | 81279                       | 100.0%          | .     | .               | 81279      |
| 0-0.89 mmol/L                         | 2408                        | 26.9%           | 6532  | 73.1%           | 8940       |
| 0.9-1.19 mmol/L                       | 7973                        | 27.7%           | 20818 | 72.3%           | 28791      |
| 1.2-1.29 mmol/L                       | 3092                        | 27.4%           | 8186  | 72.6%           | 11278      |
| 1.3-1.59 mmol/L                       | 8069                        | 27.8%           | 20947 | 72.2%           | 29016      |
| 1.60+ mmol/L                          | 11424                       | 30.1%           | 26581 | 69.9%           | 38005      |
| <b>Total cholesterol (mmol/L)</b>     |                             |                 |       |                 |            |
| Missing                               | 82989                       | 100.0%          | .     | .               | 82989      |
| 0-4.09 mmol/L                         | 6336                        | 24.1%           | 19917 | 75.9%           | 26253      |
| 4.1-5.19 mmol/L                       | 11400                       | 27.9%           | 29469 | 72.1%           | 40869      |
| 5.2-6.19 mmol/L                       | 8686                        | 28.3%           | 21986 | 71.7%           | 30672      |
| 6.2-7.19 mmol/L                       | 3167                        | 27.6%           | 8310  | 72.4%           | 11477      |
| 7.2+ mmol/L                           | 1667                        | 33.0%           | 3382  | 67.0%           | 5049       |
| <b>Systolic blood pressure (mmHg)</b> |                             |                 |       |                 |            |
| Missing                               | 62874                       | 98.0%           | 1305  | 2.0%            | 64179      |
| 120 mmHg or less                      | 18185                       | 41.6%           | 25553 | 58.4%           | 43738      |
| 120-129 mmHg                          | 14338                       | 38.0%           | 23354 | 62.0%           | 37692      |
| 130-139 mmHg                          | 10431                       | 35.4%           | 19058 | 64.6%           | 29489      |
| 140-149 mmHg                          | 5359                        | 37.2%           | 9034  | 62.8%           | 14393      |
| 150-159 mmHg                          | 2270                        | 38.6%           | 3606  | 61.4%           | 5876       |
| 160 mmHg or more                      | 788                         | 40.6%           | 1154  | 59.4%           | 1942       |
| <b>Smoking Status</b>                 | 41077                       | 100.0%          | .     | .               | 41077      |

|                              | Calculable Framingham Score |                 |              |                 | Total<br>N    |
|------------------------------|-----------------------------|-----------------|--------------|-----------------|---------------|
|                              | No                          |                 | Yes          |                 |               |
|                              | N                           | Row Percent (%) | N            | Row Percent (%) |               |
| Missing                      |                             |                 |              |                 |               |
| Non-smoker                   | 58342                       | 45.4%           | 70087        | 54.6%           | 128429        |
| Smoker                       | 14826                       | 53.3%           | 12977        | 46.7%           | 27803         |
| Type II Diabetes Mellitus    |                             |                 |              |                 |               |
| No                           | 105354                      | 61.2%           | 66750        | 38.8%           | 172104        |
| Yes                          | 8891                        | 35.3%           | 16314        | 64.7%           | 25205         |
| Anti-Hypertensive medication |                             |                 |              |                 |               |
| No                           | 92342                       | 64.2%           | 51559        | 35.8%           | 143901        |
| Yes                          | 21903                       | 41.0%           | 31505        | 59.0%           | 53408         |
| <b>Total</b>                 | <b>114245</b>               | <b>57.9%</b>    | <b>83064</b> | <b>42.1%</b>    | <b>197309</b> |

525

526

527

528

529 Table 3: Calculable Framingham score with respect to patient, provider and geographical

530 characteristics

|                                | Calculable Framingham Score |                 |       |                 | Total<br>N |
|--------------------------------|-----------------------------|-----------------|-------|-----------------|------------|
|                                | No                          |                 | Yes   |                 |            |
|                                | N                           | Row Percent (%) | N     | Row Percent (%) |            |
| Schizophrenia                  |                             |                 |       |                 |            |
| No                             | 111564                      | 58.0%           | 80863 | 42.0%           | 192427     |
| Yes                            | 2681                        | 54.9%           | 2201  | 45.1%           | 4882       |
| BMI level (Kg/m <sup>2</sup> ) |                             |                 |       |                 |            |
| Missing                        | 84398                       | 77.7%           | 24206 | 22.3%           | 108604     |
| 18.4 or less (Underweight)     | 378                         | 42.9%           | 503   | 57.1%           | 881        |
| 18.5 - 24.9 (Normal)           | 9191                        | 38.6%           | 14619 | 61.4%           | 23810      |
| 25 - 29.9 (overweight)         | 10622                       | 32.6%           | 21935 | 67.4%           | 32557      |
| 30 - 34.9 (Obese Class I)      | 5847                        | 30.5%           | 13331 | 69.5%           | 19178      |
| 35 - 39.9 (Obese Class II)     | 2306                        | 30.4%           | 5279  | 69.6%           | 7585       |
| 40 or more (Obese Class III)   | 1503                        | 32.0%           | 3191  | 68.0%           | 4694       |
| No. of encounters              |                             |                 |       |                 |            |
| Missing                        | 42673                       | 86.0%           | 6952  | 14.0%           | 49625      |
| 3-5 visits                     | 25915                       | 58.6%           | 18311 | 41.4%           | 44226      |
| 6-9 visits                     | 19861                       | 48.8%           | 20830 | 51.2%           | 40691      |
| >=10 visits                    | 25796                       | 41.1%           | 36971 | 58.9%           | 62767      |
| Income Quintiles               |                             |                 |       |                 |            |
| Missing                        | 14795                       | 58.9%           | 10326 | 41.1%           | 25121      |
| 1                              | 15851                       | 58.7%           | 11162 | 41.3%           | 27013      |
| 2                              | 15883                       | 58.3%           | 11348 | 41.7%           | 27231      |
| 3                              | 17118                       | 58.2%           | 12281 | 41.8%           | 29399      |
| 4                              | 20810                       | 57.8%           | 15221 | 42.2%           | 36031      |
| 5                              | 29788                       | 56.7%           | 22726 | 43.3%           | 52514      |
| Region                         | 2284                        | 73.6%           | 819   | 26.4%           | 3103       |

|                     | Calculable Framingham Score |                 |       |                 | Total<br>N |
|---------------------|-----------------------------|-----------------|-------|-----------------|------------|
|                     | No                          |                 | Yes   |                 |            |
|                     | N                           | Row Percent (%) | N     | Row Percent (%) |            |
| Missing             |                             |                 |       |                 |            |
| Rural               | 11590                       | 59.7%           | 7833  | 40.3%           | 19423      |
| Urban               | 100371                      | 57.4%           | 74412 | 42.6%           | 174783     |
| <b>Provider age</b> |                             |                 |       |                 |            |
| Missing             | 5880                        | 50.6%           | 5741  | 49.4%           | 11621      |
| 29-39 years         | 21926                       | 54.1%           | 18618 | 45.9%           | 40544      |
| 40-49 years         | 23203                       | 58.4%           | 16550 | 41.6%           | 39753      |
| 50-59 years         | 29127                       | 55.9%           | 22943 | 44.1%           | 52070      |
| 60+ years           | 34109                       | 64.0%           | 19212 | 36.0%           | 53321      |
| <b>Provider sex</b> |                             |                 |       |                 |            |
| Female              | 52950                       | 54.2%           | 44655 | 45.8%           | 97605      |
| Male                | 61295                       | 61.5%           | 38409 | 38.5%           | 99704      |
| <b>Total</b>        | 114245                      | 57.9%           | 83064 | 42.1%           | 197309     |

531  
532  
533  
534  
535  
536  
537  
538  
539  
540  
541  
542  
543  
544  
545  
546  
547  
548  
549  
550  
551  
552  
553

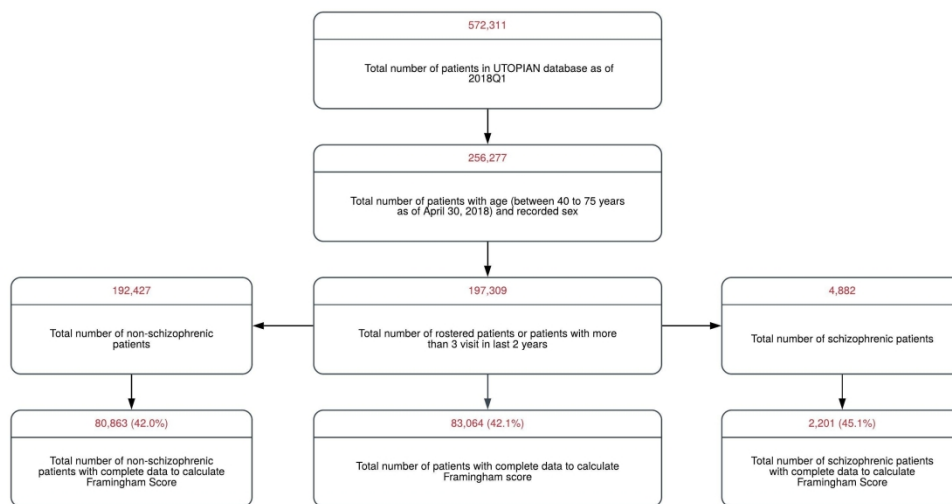

Distribution of Framingham risk factors among patients with and without schizophrenia

263x142mm (300 x 300 DPI)



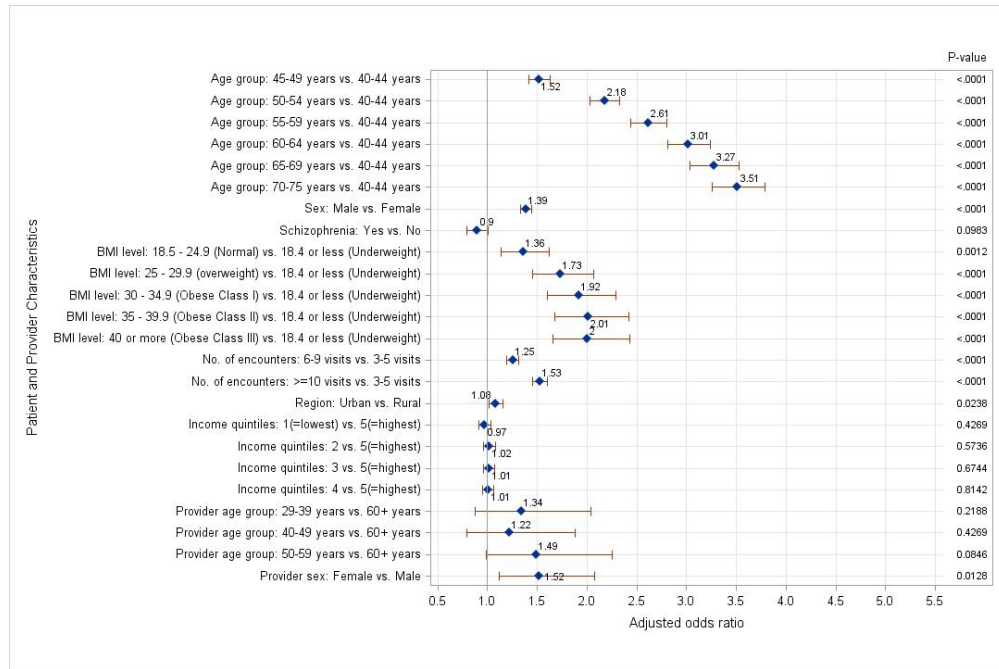

Adjusted odds ratios for calculable Framingham score using random-effects multilevel logistic regression model

285x190mm (96 x 96 DPI)

## Supplementary tables

Table S1: Unadjusted odds ratios for calculable Framingham score using random-effects multilevel logistic regression model

| Unadjusted odds ratio |                                 |                               |            |             |             |         |
|-----------------------|---------------------------------|-------------------------------|------------|-------------|-------------|---------|
| Characteristics       | Index group                     | Reference group               | Odds Ratio | Lower limit | Upper limit | P-value |
| Age                   | 45-49 years                     | 40-44 years                   | 1.49       | 1.434       | 1.547       | <.0001  |
| Age                   | 50-54 years                     | 40-44 years                   | 2.24       | 2.162       | 2.329       | <.0001  |
| Age                   | 55-59 years                     | 40-44 years                   | 2.78       | 2.681       | 2.887       | <.0001  |
| Age                   | 60-64 years                     | 40-44 years                   | 3.50       | 3.371       | 3.640       | <.0001  |
| Age                   | 65-69 years                     | 40-44 years                   | 4.44       | 4.266       | 4.626       | <.0001  |
| Age                   | 70-75 years                     | 40-44 years                   | 5.05       | 4.850       | 5.262       | <.0001  |
| Sex                   | Male                            | Female                        | 1.07       | 1.048       | 1.092       | <.0001  |
| Schizophrenia         | Yes                             | No                            | 1.25       | 1.173       | 1.327       | <.0001  |
| BMI level             | 18.5 - 24.9<br>(Normal)         | 18.4 or less<br>(Underweight) | 1.25       | 1.077       | 1.450       | 0.0043  |
| BMI level             | 25 - 29.9<br>(overweight)       | 18.4 or less<br>(Underweight) | 1.77       | 1.522       | 2.047       | <.0001  |
| BMI level             | 30 - 34.9<br>(Obese Class I)    | 18.4 or less<br>(Underweight) | 2.03       | 1.749       | 2.361       | <.0001  |
| BMI level             | 35 - 39.9<br>(Obese Class II)   | 18.4 or less<br>(Underweight) | 2.09       | 1.784       | 2.437       | <.0001  |
| BMI level             | 40 or more<br>(Obese Class III) | 18.4 or less<br>(Underweight) | 1.99       | 1.695       | 2.342       | <.0001  |
| No. of encounters     | 6-9 visits                      | 3-5 visits                    | 1.60       | 1.558       | 1.653       | <.0001  |
| No. of encounters     | >=10 visits                     | 3-5 visits                    | 2.39       | 2.320       | 2.455       | <.0001  |
| Region                | Urban                           | Rural                         | 1.06       | 1.026       | 1.105       | 0.0012  |
| Income quintiles      | 1(=lowest)                      | 5(=highest)                   | 1.04       | 1.004       | 1.075       | 0.0326  |
| Income quintiles      | 2                               | 5(=highest)                   | 1.05       | 1.020       | 1.089       | 0.0023  |
| Income quintiles      | 3                               | 5(=highest)                   | 1.04       | 1.005       | 1.071       | 0.0261  |
| Income quintiles      | 4                               | 5(=highest)                   | 1.00       | 0.974       | 1.034       | 0.8188  |
| Provider age          | 29-39 years                     | 60+ years                     | 1.69       | 1.225       | 2.334       | 0.0020  |
| Provider age          | 40-49 years                     | 60+ years                     | 1.36       | 0.972       | 1.914       | 0.0757  |
| Provider age          | 50-59 years                     | 60+ years                     | 1.38       | 0.986       | 1.944       | 0.0655  |
| Provider sex          | Female                          | Male                          | 1.61       | 1.296       | 2.012       | <.0001  |

Table S2: Adjusted odds ratios for calculable Framingham score using random-effects multilevel logistic regression model

| Adjusted odds ratio |                                 |                            |            |             |             |         |
|---------------------|---------------------------------|----------------------------|------------|-------------|-------------|---------|
| Characteristics     | Index group                     | Reference group            | Odds Ratio | Lower limit | Upper limit | P-value |
| Age group           | 45-49 years                     | 40-44 years                | 1.52       | 1.41        | 1.63        | <.0001  |
| Age group           | 50-54 years                     | 40-44 years                | 2.18       | 2.03        | 2.33        | <.0001  |
| Age group           | 55-59 years                     | 40-44 years                | 2.61       | 2.44        | 2.80        | <.0001  |
| Age group           | 65-69 years                     | 40-44 years                | 3.27       | 3.04        | 3.52        | <.0001  |
| Age group           | 70-75 years                     | 40-44 years                | 3.51       | 3.26        | 3.78        | <.0001  |
| Sex                 | Male                            | Female                     | 1.39       | 1.33        | 1.45        | <.0001  |
| Schizophrenia       | Yes                             | No                         | 0.90       | 0.79        | 1.01        | 0.0983  |
| BMI level           | 18.5 - 24.9<br>(Normal)         | 18.4 or less (Underweight) | 1.36       | 1.14        | 1.62        | 0.0012  |
| BMI level           | 25 - 29.9<br>(overweight)       | 18.4 or less (Underweight) | 1.73       | 1.45        | 2.07        | <.0001  |
| BMI level           | 30 - 34.9 (Obese<br>Class I)    | 18.4 or less (Underweight) | 1.92       | 1.60        | 2.29        | <.0001  |
| BMI level           | 35 - 39.9 (Obese<br>Class II)   | 18.4 or less (Underweight) | 2.01       | 1.67        | 2.42        | <.0001  |
| BMI level           | 40 or more<br>(Obese Class III) | 18.4 or less (Underweight) | 2.00       | 1.66        | 2.43        | <.0001  |
| No. of encounters   | 6-9 visits                      | 3-5 visits                 | 1.25       | 1.19        | 1.31        | <.0001  |
| No. of encounters   | >=10 visits                     | 3-5 visits                 | 1.53       | 1.46        | 1.60        | <.0001  |
| Region              | Urban                           | Rural                      | 1.08       | 1.02        | 1.16        | 0.0238  |
| Income quintiles    | 1(=lowest)                      | 5(=highest)                | 0.97       | 0.91        | 1.03        | 0.4269  |
| Income quintiles    | 2                               | 5(=highest)                | 1.02       | 0.96        | 1.08        | 0.5736  |
| Income quintiles    | 3                               | 5(=highest)                | 1.01       | 0.96        | 1.07        | 0.6744  |
| Income quintiles    | 4                               | 5(=highest)                | 1.01       | 0.96        | 1.06        | 0.8142  |
| Provider age group  | 29-39 years                     | 60+ years                  | 1.34       | 0.88        | 2.04        | 0.2188  |
| Provider age group  | 40-49 years                     | 60+ years                  | 1.22       | 0.79        | 1.88        | 0.4269  |
| Provider age group  | 50-59 years                     | 60+ years                  | 1.49       | 0.98        | 2.26        | 0.0846  |
| Provider sex        | Female                          | Male                       | 1.52       | 1.12        | 2.07        | 0.0128  |

STROBE Statement—Checklist of items that should be included in reports of *cohort studies***Cardiovascular disease risk in patients with schizophrenia: retrospective cohort study of risk factor documentation and management in primary care electronic medical records**

|                              | Item No | Recommendation                                                                                                                                                                                                                                                                                                         | Page No |
|------------------------------|---------|------------------------------------------------------------------------------------------------------------------------------------------------------------------------------------------------------------------------------------------------------------------------------------------------------------------------|---------|
| <b>Title and abstract</b>    | 1       | (a) Indicate the study's design with a commonly used term in the title or the abstract<br>(b) Provide in the abstract an informative and balanced summary of what was done and what was found                                                                                                                          | 1<br>2  |
| <b>Introduction</b>          |         |                                                                                                                                                                                                                                                                                                                        |         |
| Background/rationale         | 2       | Explain the scientific background and rationale for the investigation being reported                                                                                                                                                                                                                                   | 4       |
| Objectives                   | 3       | State specific objectives, including any prespecified hypotheses                                                                                                                                                                                                                                                       | 5       |
| <b>Methods</b>               |         |                                                                                                                                                                                                                                                                                                                        |         |
| Study design                 | 4       | Present key elements of study design early in the paper                                                                                                                                                                                                                                                                | 5       |
| Setting                      | 5       | Describe the setting, locations, and relevant dates, including periods of recruitment, exposure, follow-up, and data collection                                                                                                                                                                                        | 5       |
| Participants                 | 6       | (a) Give the eligibility criteria, and the sources and methods of selection of participants. Describe methods of follow-up<br>(b) For matched studies, give matching criteria and number of exposed and unexposed                                                                                                      | 6       |
| Variables                    | 7       | Clearly define all outcomes, exposures, predictors, potential confounders, and effect modifiers. Give diagnostic criteria, if applicable                                                                                                                                                                               | 6       |
| Data sources/<br>measurement | 8*      | For each variable of interest, give sources of data and details of methods of assessment (measurement). Describe comparability of assessment methods if there is more than one group                                                                                                                                   | 6       |
| Bias                         | 9       | Describe any efforts to address potential sources of bias                                                                                                                                                                                                                                                              | 7       |
| Study size                   | 10      | Explain how the study size was arrived at                                                                                                                                                                                                                                                                              | 7       |
| Quantitative variables       | 11      | Explain how quantitative variables were handled in the analyses. If applicable, describe which groupings were chosen and why                                                                                                                                                                                           | 7       |
| Statistical methods          | 12      | (a) Describe all statistical methods, including those used to control for confounding<br>(b) Describe any methods used to examine subgroups and interactions<br>(c) Explain how missing data were addressed<br>(d) If applicable, explain how loss to follow-up was addressed<br>(e) Describe any sensitivity analyses | 7       |
| <b>Results</b>               |         |                                                                                                                                                                                                                                                                                                                        |         |
| Participants                 | 13*     | (a) Report numbers of individuals at each stage of study—eg numbers potentially eligible, examined for eligibility, confirmed eligible, included in the study, completing follow-up, and analysed<br>(b) Give reasons for non-participation at each stage<br>(c) Consider use of a flow diagram                        | 7/8     |
| Descriptive data             | 14*     | (a) Give characteristics of study participants (eg demographic, clinical, social) and information on exposures and potential confounders<br>(b) Indicate number of participants with missing data for each variable of interest<br>(c) Summarise follow-up time (eg, average and total amount)                         | 8       |

|   |              |     |                                                                |   |
|---|--------------|-----|----------------------------------------------------------------|---|
| 1 | Outcome data | 15* | Report numbers of outcome events or summary measures over time | 8 |
|---|--------------|-----|----------------------------------------------------------------|---|

2  
3  
4  
5  
6  
7  
8  
9  
10  
11  
12  
13  
14  
15  
16  
17  
18  
19  
20  
21  
22  
23  
24  
25  
26  
27  
28  
29  
30  
31  
32  
33  
34  
35  
36  
37  
38  
39  
40  
41  
42  
43  
44  
45  
46  
47  
48  
49  
50  
51  
52  
53  
54  
55  
56  
57  
58  
59  
60

For peer review only

|    |                          |    |                                                                                                                                                                                                              |    |
|----|--------------------------|----|--------------------------------------------------------------------------------------------------------------------------------------------------------------------------------------------------------------|----|
| 1  | Main results             | 16 | (a) Give unadjusted estimates and, if applicable, confounder-adjusted estimates and their precision (eg, 95% confidence interval). Make clear which confounders were adjusted for and why they were included | 8  |
| 2  |                          |    | (b) Report category boundaries when continuous variables were categorized                                                                                                                                    |    |
| 3  |                          |    | (c) If relevant, consider translating estimates of relative risk into absolute risk for a meaningful time period                                                                                             |    |
| 4  |                          |    |                                                                                                                                                                                                              |    |
| 5  |                          |    |                                                                                                                                                                                                              |    |
| 6  |                          |    |                                                                                                                                                                                                              |    |
| 7  |                          |    |                                                                                                                                                                                                              |    |
| 8  |                          |    |                                                                                                                                                                                                              |    |
| 9  | Other analyses           | 17 | Report other analyses done—eg analyses of subgroups and interactions, and sensitivity analyses                                                                                                               | 9  |
| 10 |                          |    |                                                                                                                                                                                                              |    |
| 11 | <b>Discussion</b>        |    |                                                                                                                                                                                                              |    |
| 12 |                          |    |                                                                                                                                                                                                              |    |
| 13 | Key results              | 18 | Summarise key results with reference to study objectives                                                                                                                                                     | 9  |
| 14 | Limitations              | 19 | Discuss limitations of the study, taking into account sources of potential bias or imprecision. Discuss both direction and magnitude of any potential bias                                                   | 10 |
| 15 |                          |    |                                                                                                                                                                                                              |    |
| 16 | Interpretation           | 20 | Give a cautious overall interpretation of results considering objectives, limitations, multiplicity of analyses, results from similar studies, and other relevant evidence                                   | 10 |
| 17 |                          |    |                                                                                                                                                                                                              |    |
| 18 |                          |    |                                                                                                                                                                                                              |    |
| 19 | Generalisability         | 21 | Discuss the generalisability (external validity) of the study results                                                                                                                                        | 10 |
| 20 |                          |    |                                                                                                                                                                                                              |    |
| 21 | <b>Other information</b> |    |                                                                                                                                                                                                              |    |
| 22 | Funding                  | 22 | Give the source of funding and the role of the funders for the present study and, if applicable, for the original study on which the present article is based                                                | 1  |
| 23 |                          |    |                                                                                                                                                                                                              |    |
| 24 |                          |    |                                                                                                                                                                                                              |    |

\*Give information separately for exposed and unexposed groups.

**Note:** An Explanation and Elaboration article discusses each checklist item and gives methodological background and published examples of transparent reporting. The STROBE checklist is best used in conjunction with this article (freely available on the Web sites of PLoS Medicine at <http://www.plosmedicine.org/>, Annals of Internal Medicine at <http://www.annals.org/>, and Epidemiology at <http://www.epidem.com/>). Information on the STROBE Initiative is available at <http://www.strobe-statement.org>.
