# Supplementary material for: Cardiovascular risk factor documentation and management in primary care electronic medical records among people with schizophrenia in Ontario, Canada: retrospective cohort study
Source: PubMed Central journal article supplement — BMJ Open. 2020 Oct 16;10(10):e038013. doi: 10.1136/bmjopen-2020-038013 (PMC7569984; doi:10.1136/bmjopen-2020-038013), 2020-10-16
Supplement: bmjopen-2020-038013supp001.pdf [file bmjopen-2020-038013supp001.pdf]

## Supplementary tables

Table S1: Unadjusted odds ratios for calculable Framingham score using random-effects multilevel logistic regression model

| Unadjusted odds ratio |                              |                            |            |             |             |         |
|-----------------------|------------------------------|----------------------------|------------|-------------|-------------|---------|
| Characteristics       | Index group                  | Reference group            | Odds Ratio | Lower limit | Upper limit | P-value |
| Age                   | 45-49 years                  | 40-44 years                | 1.49       | 1.434       | 1.547       | <.0001  |
| Age                   | 50-54 years                  | 40-44 years                | 2.24       | 2.162       | 2.329       | <.0001  |
| Age                   | 55-59 years                  | 40-44 years                | 2.78       | 2.681       | 2.887       | <.0001  |
| Age                   | 60-64 years                  | 40-44 years                | 3.50       | 3.371       | 3.640       | <.0001  |
| Age                   | 65-69 years                  | 40-44 years                | 4.44       | 4.266       | 4.626       | <.0001  |
| Age                   | 70-75 years                  | 40-44 years                | 5.05       | 4.850       | 5.262       | <.0001  |
| Sex                   | Male                         | Female                     | 1.07       | 1.048       | 1.092       | <.0001  |
| Schizophrenia         | Yes                          | No                         | 1.25       | 1.173       | 1.327       | <.0001  |
| BMI level             | 18.5 - 24.9 (Normal)         | 18.4 or less (Underweight) | 1.25       | 1.077       | 1.450       | 0.0043  |
| BMI level             | 25 - 29.9 (overweight)       | 18.4 or less (Underweight) | 1.77       | 1.522       | 2.047       | <.0001  |
| BMI level             | 30 - 34.9 (Obese Class I)    | 18.4 or less (Underweight) | 2.03       | 1.749       | 2.361       | <.0001  |
| BMI level             | 35 - 39.9 (Obese Class II)   | 18.4 or less (Underweight) | 2.09       | 1.784       | 2.437       | <.0001  |
| BMI level             | 40 or more (Obese Class III) | 18.4 or less (Underweight) | 1.99       | 1.695       | 2.342       | <.0001  |
| No. of encounters     | 6-9 visits                   | 3-5 visits                 | 1.60       | 1.558       | 1.653       | <.0001  |
| No. of encounters     | >=10 visits                  | 3-5 visits                 | 2.39       | 2.320       | 2.455       | <.0001  |
| Region                | Urban                        | Rural                      | 1.06       | 1.026       | 1.105       | 0.0012  |
| Income quintiles      | 1(=lowest)                   | 5(=highest)                | 1.04       | 1.004       | 1.075       | 0.0326  |
| Income quintiles      | 2                            | 5(=highest)                | 1.05       | 1.020       | 1.089       | 0.0023  |
| Income quintiles      | 3                            | 5(=highest)                | 1.04       | 1.005       | 1.071       | 0.0261  |
| Income quintiles      | 4                            | 5(=highest)                | 1.00       | 0.974       | 1.034       | 0.8188  |
| Provider age          | 29-39 years                  | 60+ years                  | 1.69       | 1.225       | 2.334       | 0.0020  |
| Provider age          | 40-49 years                  | 60+ years                  | 1.36       | 0.972       | 1.914       | 0.0757  |
| Provider age          | 50-59 years                  | 60+ years                  | 1.38       | 0.986       | 1.944       | 0.0655  |
| Provider sex          | Female                       | Male                       | 1.61       | 1.296       | 2.012       | <.0001  |

Table S2: Adjusted odds ratios for calculable Framingham score using random-effects multilevel logistic regression model

| Adjusted odds ratio |                              |                            |            |             |             |         |
|---------------------|------------------------------|----------------------------|------------|-------------|-------------|---------|
| Characteristics     | Index group                  | Reference group            | Odds Ratio | Lower limit | Upper limit | P-value |
| Age group           | 45-49 years                  | 40-44 years                | 1.52       | 1.41        | 1.63        | <.0001  |
| Age group           | 50-54 years                  | 40-44 years                | 2.18       | 2.03        | 2.33        | <.0001  |
| Age group           | 55-59 years                  | 40-44 years                | 2.61       | 2.44        | 2.80        | <.0001  |
| Age group           | 65-69 years                  | 40-44 years                | 3.27       | 3.04        | 3.52        | <.0001  |
| Age group           | 70-75 years                  | 40-44 years                | 3.51       | 3.26        | 3.78        | <.0001  |
| Sex                 | Male                         | Female                     | 1.39       | 1.33        | 1.45        | <.0001  |
| Schizophrenia       | Yes                          | No                         | 0.90       | 0.79        | 1.01        | 0.0983  |
| BMI level           | 18.5 - 24.9 (Normal)         | 18.4 or less (Underweight) | 1.36       | 1.14        | 1.62        | 0.0012  |
| BMI level           | 25 - 29.9 (overweight)       | 18.4 or less (Underweight) | 1.73       | 1.45        | 2.07        | <.0001  |
| BMI level           | 30 - 34.9 (Obese Class I)    | 18.4 or less (Underweight) | 1.92       | 1.60        | 2.29        | <.0001  |
| BMI level           | 35 - 39.9 (Obese Class II)   | 18.4 or less (Underweight) | 2.01       | 1.67        | 2.42        | <.0001  |
| BMI level           | 40 or more (Obese Class III) | 18.4 or less (Underweight) | 2.00       | 1.66        | 2.43        | <.0001  |
| No. of encounters   | 6-9 visits                   | 3-5 visits                 | 1.25       | 1.19        | 1.31        | <.0001  |
| No. of encounters   | >=10 visits                  | 3-5 visits                 | 1.53       | 1.46        | 1.60        | <.0001  |
| Region              | Urban                        | Rural                      | 1.08       | 1.02        | 1.16        | 0.0238  |
| Income quintiles    | 1(=lowest)                   | 5(=highest)                | 0.97       | 0.91        | 1.03        | 0.4269  |
| Income quintiles    | 2                            | 5(=highest)                | 1.02       | 0.96        | 1.08        | 0.5736  |
| Income quintiles    | 3                            | 5(=highest)                | 1.01       | 0.96        | 1.07        | 0.6744  |
| Income quintiles    | 4                            | 5(=highest)                | 1.01       | 0.96        | 1.06        | 0.8142  |
| Provider age group  | 29-39 years                  | 60+ years                  | 1.34       | 0.88        | 2.04        | 0.2188  |
| Provider age group  | 40-49 years                  | 60+ years                  | 1.22       | 0.79        | 1.88        | 0.4269  |
| Provider age group  | 50-59 years                  | 60+ years                  | 1.49       | 0.98        | 2.26        | 0.0846  |
| Provider sex        | Female                       | Male                       | 1.52       | 1.12        | 2.07        | 0.0128  |
